# Supplementary material for: Consecutive chirality transfer: efficient synthesis of chiral C,O-chelated BINOL/gold(iii) complexes for asymmetric catalysis and chiral resolution of disubstituted BINOLs
Source: Royal Society of Chemistry journal article supplement (doi:10.1039/d4sc04221b), 2024-01-01
Supplement: d4sc04221b1.pdf [file d4sc04221b1.pdf]

## Supporting Information

# Consecutive Chirality Transfer: Efficient Synthesis of Chiral C,O-Chelated BINOL/Gold(III) Complexes for Asymmetric Catalysis and Chiral Resolution of Disubstituted BINOLs

Kwok-Heung Aries Chan,<sup>a</sup> Wa-Yi O,<sup>a</sup> Jia-Jun Jiang,<sup>b</sup> Jian-Fang Cui,<sup>\*c</sup> and Man-Kin Wong<sup>\*a</sup>

<sup>a</sup> State Key Laboratory of Chemical Biology and Drug Discovery, Research Institute for Future Food, Department of Food Science and Nutrition, The Hong Kong Polytechnic University, Hung Hom, Hong Kong, China.

<sup>b</sup> Department of Applied Biology and Chemical Technology, The Hong Kong Polytechnic University, Hung Hom, Hong Kong, China.

<sup>c</sup> School of Science and Engineering, The Chinese University of Hong Kong, Shenzhen, Guangdong, 518172, China.

E-mail: [mankin.wong@polyu.edu.hk](mailto:mankin.wong@polyu.edu.hk); [cuijf@cuhk.edu.cn](mailto:cuijf@cuhk.edu.cn)

## Table of Contents

|                                                                                                                                                      |           |
|------------------------------------------------------------------------------------------------------------------------------------------------------|-----------|
| General Procedures .....                                                                                                                             | 1         |
| Literature References.....                                                                                                                           | 1         |
| Experimental Procedures .....                                                                                                                        | 3         |
| <b>Synthesis of C,O-Chelated BINOL/Gold(III) Complexes 3a, 3g-3j.....</b>                                                                            | <b>3</b>  |
| (1) Preparation of Gold(III) Dichloride Complexes <b>1a-1e</b> .....                                                                                 | <b>3</b>  |
| (2) Column-Free Chiral Resolution Method for Preparation of Gold(III) Dichloride Complexes ( <i>R</i> )- <b>1a</b> and ( <i>S</i> )- <b>1a</b> ..... | <b>4</b>  |
| (3) Preparation of BINOL/Gold(III) Complexes .....                                                                                                   | <b>6</b>  |
| <b>Synthesis of C,O-Chelated BINOL/Gold(III) Complexes 3b-3f and Resolution of BINOLs 2b-2f .....</b>                                                | <b>6</b>  |
| (1) <sup>1</sup> H NMR Analysis for Determination of Diastereomeric Ratio of <b>3b-3f</b> .....                                                      | <b>9</b>  |
| (2) HPLC Analysis of Resolved BINOLs <b>2b-2f</b> .....                                                                                              | <b>14</b> |
| <b>Synthesis of Substrates 4a-m.....</b>                                                                                                             | <b>19</b> |
| <b>General Procedure for Gold(III) Catalyzed Asymmetric Carboalkoxylation of <i>ortho</i>-Alkynylbenzaldehydes.....</b>                              | <b>19</b> |
| <b>Study of Carboalkoxylation of <i>ortho</i>-Alkynylbenzaldehydes.....</b>                                                                          | <b>20</b> |
| <b>X-Ray Crystal Structure of (<i>R,R</i>)-3a .....</b>                                                                                              | <b>22</b> |
| <b>Characterization Data of Compounds.....</b>                                                                                                       | <b>28</b> |
| <b>NMR Spectra .....</b>                                                                                                                             | <b>36</b> |
| <b>Circular Dichroism Spectra .....</b>                                                                                                              | <b>67</b> |
| <b>Chiral HPLC Spectra .....</b>                                                                                                                     | <b>71</b> |
| <b>References.....</b>                                                                                                                               | <b>85</b> |

## General Procedures

Chemicals are purchased from commercial resources and used without further purification. Thin layer chromatography was performed on precoated silica gel 60 F254 plates. Flash column chromatography was performed using silica gel 60 (230-400 mesh ASTM).  $^1\text{H}$  NMR and  $^{13}\text{C}$  NMR spectra were recorded on Bruker DPX-400 or DPX-600 and internally referenced to TMS. Data for  $^1\text{H}$  NMR were reported as follows: chemical shift ( $\delta$ , ppm), multiplicity (s = singlet; brs = broad singlet; d = doublet; dd = double doublet; t = triplet; td = triple doublet; tt = triple triplet; q = quartet; qd = quadruple doublet, m = multiplet), coupling constant (Hz), integration. Data for  $^{13}\text{C}$  NMR are recorded in terms of chemical shift ( $\delta$ , ppm). High resolution mass spectra (HR-MS) were measured on Agilent 6540 UHD Accurate-Mass Q-TOF LC/MS system equipped with an ion spray source in the positive ion mode. X-ray crystal structures were determined by Bruker D8 Venture single crystal X-Ray diffractometer for small molecule. Compounds described in the literature were characterized by comparison of their  $^1\text{H}$  and/or  $^{13}\text{C}$  NMR spectra to the previously reported data.

## Literature References

|                                                                                                            |                                                                                                                                            |
|------------------------------------------------------------------------------------------------------------|--------------------------------------------------------------------------------------------------------------------------------------------|
| 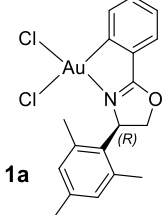 <p><b>1a</b></p>         | <p>J.-J. Jiang, J.-F. Cui, B. Yang, Y. Ning, N. C.-H. Lai, M.-K. Wong, <i>Org. Lett.</i>, 2019, <b>21</b>, 6289 – 6294.</p>                |
|  <p><b>1b</b></p>        | <p>J.-J. Jiang, J.-F. Cui, B. Yang, Y. Ning, N. C.-H. Lai, M.-K. Wong, <i>Org. Lett.</i>, 2019, <b>21</b>, 6289 – 6294.</p>                |
|  <p><b>1d</b></p>       | <p>J.-J. Jiang, J.-F. Cui, B. Yang, Y. Ning, N. C.-H. Lai, M.-K. Wong, <i>Org. Lett.</i>, 2019, <b>21</b>, 6289 – 6294.</p>                |
|  <p><b>1e</b></p>       | <p>J.-J. Jiang, J.-F. Cui, B. Yang, Y. Ning, N. C.-H. Lai, M.-K. Wong, <i>Org. Lett.</i>, 2019, <b>21</b>, 6289 – 6294.</p>                |
|  <p><b>S1</b></p>       | <p>J. C. Barrow, P. L. Ngo, J. M. Pellicore, H. G. Selnick, P. G. Nantermet, <i>Tetrahedron Lett.</i>, 2001, <b>42</b>, 2051 – 2054.</p>   |
|  <p><b>(R,R)-3i</b></p> | <p>J.-F. Cui, H.-M. Ko, K.-P. Shing, J.-R. Deng, N. C.-H. Lai, M.-K. Wong, <i>Angew. Chem. Int. Ed.</i>, 2017, <b>56</b>, 3074 – 3079.</p> |
|  <p><b>4a</b></p>       | <p>M. D. Acqua, D. Facoetti, G. Abbiati, E. Rossi, <i>Synthesis</i>, 2010, <b>14</b>, 2367 – 2378.</p>                                     |

|                                                                                                      |                                                                                                                                                                                                                                 |
|------------------------------------------------------------------------------------------------------|---------------------------------------------------------------------------------------------------------------------------------------------------------------------------------------------------------------------------------|
| 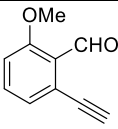 <p><b>4b</b></p>   | H. Luo, C. He, H. Jiang, S. Zhu, <i>Chin. J. Chem.</i> , 2020, <b>38</b> , 1052 – 1056.                                                                                                                                         |
|  <p><b>4c</b></p>   | Y. Ohta, Y. Kubota, T. Watabe, H. Chiba, S. Oishi, N. Fujii, H. Ohno, <i>J. Org. Chem.</i> , 2009, <b>16</b> , 6299 – 6302.                                                                                                     |
|  <p><b>4d</b></p>   | J. Kong, F. Zhang, C. Zhang, W. Chang, L. Liu, J. Li, <i>Molecular Catalysis</i> , 2022, <b>530</b> , 112633.                                                                                                                   |
|  <p><b>4e</b></p>   | W. Debrouwer, R. A. J. Seigneur, T. S. A. Heugebaerta, C. V. Stevens, <i>Chem. Commun.</i> , 2015, <b>51</b> , 729 – 732.                                                                                                       |
|  <p><b>4g</b></p>   | W. Debrouwer, R. A. J. Seigneur, T. S. A. Heugebaerta, C. V. Stevens, <i>Chem. Commun.</i> , 2015, <b>51</b> , 729 – 732.                                                                                                       |
|  <p><b>4h</b></p>   | Y. Ohta, Y. Kubota, T. Watabe, H. Chiba, S. Oishi, N. Fujii, H. Ohno, <i>J. Org. Chem.</i> , 2009, <b>74</b> , 6299 – 6302.                                                                                                     |
|  <p><b>4i</b></p> | G. He, C. Wu, J. Zhou, Q. Yang, C. Zhang, Y. Zhou, H. Zhang, H. Liu, <i>J. Org. Chem.</i> , 2018, <b>83</b> , 13356 – 13362.                                                                                                    |
|  <p><b>4j</b></p> | J. Nejedlý, M. Šámal, J. Rybáček, I. G. Sánchez, V. Houska, T. Warzecha, J. Vacek, L. Sieger, M. Buděšínský, L. Bednářová, P. Fiedler, I. Císařová, I. Stary*, I. G. Stará* <i>J. Org. Chem.</i> , 2020, <b>85</b> , 248 – 276. |
|  <p><b>4k</b></p> | J.-R. Deng, N. C.-H. Lai, K. K.-Y. Kung, B. Yang, S.-F. Chung, A. S.-L. Leung, M.-C. Choi, Y.-C. Leung, M.-K. Wong, <i>Commun. Chem.</i> , 2020, <b>3</b> , 67.                                                                 |
|  <p><b>4l</b></p> | Z. Cao, H. Zhang, X. Zhang, L. Zhang, X. Meng, G. Chen, X.-E. Zhao, X. Suna, J. You, <i>RSC Adv.</i> , 2015, <b>5</b> , 103155 – 103158.                                                                                        |
|  <p><b>4m</b></p> | Z. Cao, H. Zhang, X. Zhang, L. Zhang, X. Meng, G. Chen, X.-E. Zhao, X. Suna, J. You, <i>RSC Adv.</i> , 2015, <b>5</b> , 103155 – 103158.                                                                                        |
|  <p><b>5a</b></p> | J.-J. Jiang, J.-F. Cui, B. Yang, Y. Ning, N. C.-H. Lai, M.-K. Wong, <i>Org. Lett.</i> , 2019, <b>21</b> , 6289 – 6294.                                                                                                          |
|  <p><b>5c</b></p> | J.-J. Jiang, J.-F. Cui, B. Yang, Y. Ning, N. C.-H. Lai, M.-K. Wong, <i>Org. Lett.</i> , 2019, <b>21</b> , 6289 – 6294.                                                                                                          |

|                                                                                                    |                                                                                                                                          |
|----------------------------------------------------------------------------------------------------|------------------------------------------------------------------------------------------------------------------------------------------|
| 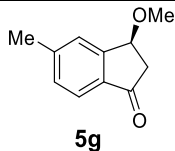 <p><b>5g</b></p> | J.-J. Jiang, J.-F. Cui, B. Yang, Y. Ning, N. C.-H. Lai, M.-K. Wong, <i>Org. Lett.</i> , 2019, <b>21</b> , 6289 – 6294.                   |
|  <p><b>5h</b></p> | J.-J. Jiang, J.-F. Cui, B. Yang, Y. Ning, N. C.-H. Lai, M.-K. Wong, <i>Org. Lett.</i> , 2019, <b>21</b> , 6289 – 6294.                   |
|  <p><b>5l</b></p> | Z. Cao, H. Zhang, X. Zhang, L. Zhang, X. Meng, G. Chen, X.-E. Zhao, X. Suna, J. You, <i>RSC Adv.</i> , 2015, <b>5</b> , 103155 – 103158. |
|  <p><b>5m</b></p> | Z. Cao, H. Zhang, X. Zhang, L. Zhang, X. Meng, G. Chen, X.-E. Zhao, X. Suna, J. You, <i>RSC Adv.</i> , 2015, <b>5</b> , 103155 – 103158. |
|  <p><b>5n</b></p> | J.-J. Jiang, J.-F. Cui, B. Yang, Y. Ning, N. C.-H. Lai, M.-K. Wong, <i>Org. Lett.</i> , 2019, <b>21</b> , 6289 – 6294.                   |

## Experimental Procedures

### Synthesis of C,O-Chelated BINOL/Gold(III) Complexes 3a, 3g-3j

#### (1) Preparation of Gold(III) Dichloride Complexes 1a-1e

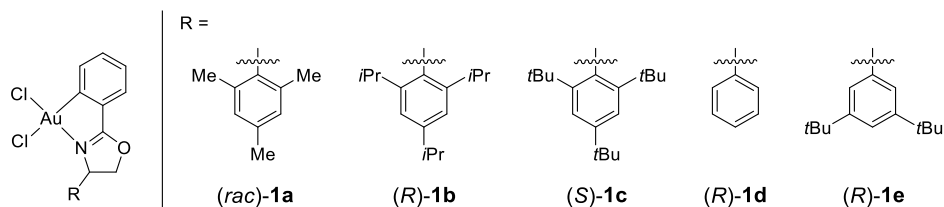

Compounds (*rac*)-**1a**, (*R*)-**1b**, (*R*)-**1d** and (*R*)-**1e** were synthesized and identified with reference to the characterization data of our previously reported paper.<sup>1</sup>

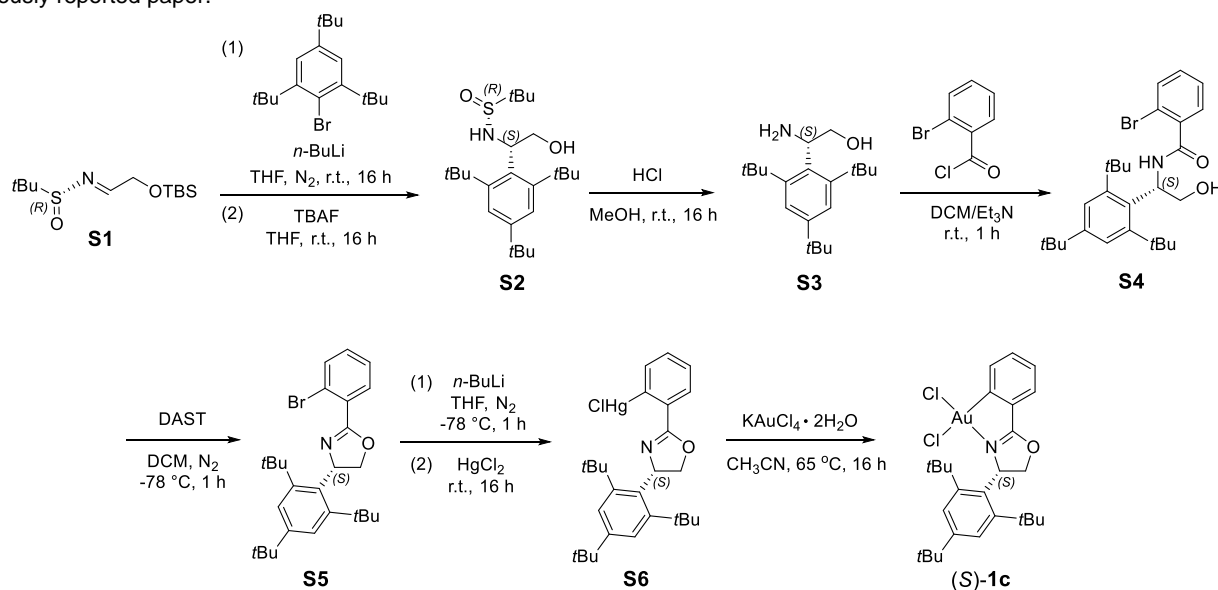

Compound **S1** was synthesized and identified with reference to the characterization data of literature.<sup>2</sup>

Compound **S2**: A solution of 2-Bromo-1,3,5-tri-tert-butylbenzene (5.47 g, 16.8 mmol) in anhydrous THF (90 mL) was cooled to 0 °C under N<sub>2</sub>, followed by the dropwise addition of *n*-butyllithium (*n*-BuLi, 1.6 M solution in hexane, 12.25 mL). The solution was warmed to room temperature and stirred for 2 h. Compound **S1** (3.89 g, 14 mmol) was dissolved in anhydrous THF (10 mL) and dropwise added to the solution. The reaction mixture was stirred for further 16 h. When the reaction completed, saturated NH<sub>4</sub>Cl aqueous solution (30 mL) was added. The aqueous phase was extracted by EA (50 mL × 3). The organic phase was combined, dried with anhydrous MgSO<sub>4</sub>, concentrated under reduced pressure, and subjected to flash column chromatography (hexane/EA), affording product as a pale-yellow oil (2.32 g, 4.43 mmol, 32% yield). The product was then treated with tetra-*n*-butylammonium fluoride (TBAF, 1.0 M solution in THF, 5.27 mL) in THF (22 mL). The reaction mixture was stirred at room temperature for 16 h. When the reaction completed, water (30 mL) was added. The reaction mixture was extracted with EA (20 mL × 3) and washed with brine (30 mL). The organic phase was combined, dried with anhydrous MgSO<sub>4</sub>, concentrated under reduced pressure and subjected to flash column chromatography (hexane/DCM/EA), affording compound **S2** as a white solid (922 mg, 2.25 mmol, 51% yield).

Compound **S3**: Compound **S2** (865 mg, 2.11 mmol) was suspended in the solution of HCl aqueous solution (12 M, 6 mL) and MeOH (6 mL). After stirring for 2 h at room temperature, the reaction mixture became a clear pale-yellow solution. The solution was cooled to 0 °C and adjusted to pH 12. The solution was diluted with water and then extracted with DCM (20 mL × 5) and washed with brine (30 mL). The organic phase was combined, dried with anhydrous MgSO<sub>4</sub>, concentrated under reduced pressure and subjected to flash column chromatography (DCM/MeOH), affording compound **S3** as a white solid (638 mg, 2.08 mmol, 99% yield).

Compound **S4**: 2-bromobenzoyl chloride (483 mg, 2.2 mmol, 287 μL) was added dropwise to a solution of compound **S3** (611 mg, 2 mmol) and triethylamine (Et<sub>3</sub>N, 1 mL) in DCM (2 mL) at 0 °C. The solution was then allowed to warm to room temperature and stirred for 1 h. When the reaction was completed, the water (10 mL) was added. The reaction mixture was extracted with EA (10 mL × 3) and washed with brine (30 mL). The organic phase was combined, dried with anhydrous MgSO<sub>4</sub>, concentrated under reduced pressure and subjected to flash column chromatography (hexane/acetone), affording compound **S4** as a white solid (713 mg, 1.46 mmol, 73% yield).

Compound **S5**: A solution of compound **S4** (691 g, 1.42 mmol) in dry DCM (10 mL) was cooled to -78 °C under N<sub>2</sub>, followed by the dropwise addition of diethylaminosulfur trifluoride (DAST, 251 mg, 1.56 mmol, 204 μL) and stirred for 1 h. Potassium carbonate (K<sub>2</sub>CO<sub>3</sub>, 179 mg, 2.13 mmol) was added. The reaction mixture was warmed to room temperature and stirred for further 1 h. When the reaction completed, saturated NaHCO<sub>3</sub> was slowly added to the mixture until no bubble coming out. The reaction mixture was extracted with DCM (30 mL × 3) and washed with brine (30 mL). The organic phase was combined, dried with anhydrous MgSO<sub>4</sub>, concentrated under reduced pressure and subjected to flash column chromatography (hexane/EA), affording compound **S5** as a white solid (563 mg, 1.20 mmol, 84% yield).

Compound **S6**: A solution of compound **S5** (471 g, 1 mmol) in anhydrous THF (5 mL) was cooled to -78 °C under N<sub>2</sub>, followed by the dropwise addition of *n*-butyllithium (*n*-BuLi, 1.6 M solution in hexane, 938 μL) and stirred for 1 h. HgCl<sub>2</sub> (326 mg, 1.2 mmol) was added and the mixture was warmed to room temperature and stirred for further 16 h. The reaction was quenched by water and filtered through celite. The filtrate was extracted by DCM (10 mL × 3) and washed with brine (30 mL). The organic phase was combined, dried with anhydrous MgSO<sub>4</sub>, concentrated under reduced pressure and subjected to flash column chromatography (hexane/DCM), affording compound **S6** as a white solid (333 mg, 0.532 mmol, 53% yield).

Compound (*S*)-**1c**: A mixture of compound **S6** (265 mg, 0.423 mmol) and KAuCl<sub>4</sub>·2H<sub>2</sub>O (193 mg, 0.465 mmol) in CH<sub>3</sub>CN (2 mL) was heated to 65 °C and stirred for 16 h. When the reaction completed, the solution was dried under reduced pressure and suspended by DCM. The suspension was filter through celite and the filtrate was subjected to flash column chromatography (hexane/acetone). The resulting solid was washed by isopropanol, affording compound (*S*)-**1c** as a white solid (145 mg, 0.220 mmol, 52% yield).

## (2) Column-Free Chiral Resolution Method for Preparation of Gold(III) Dichloride Complexes (*R*)-**1a** and (*S*)-**1a**

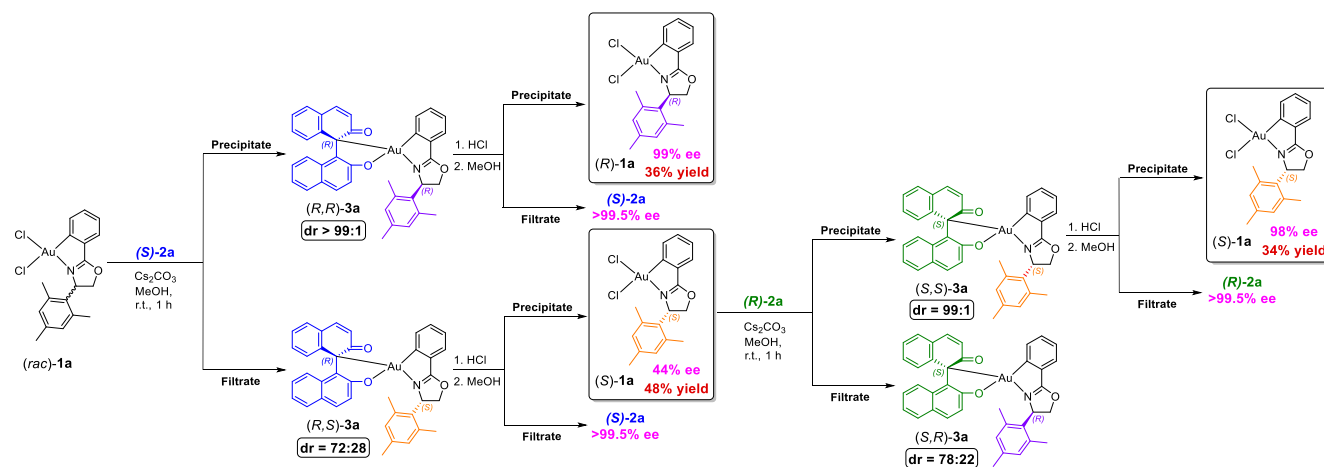

**Diastereomeric resolution:** A mixture of racemic cyclometalated gold(III) complex (C<sup>N</sup>)AuCl<sub>2</sub> (*rac*)-**1a** (1.0 g, 1.878 mmol, 1.0 equiv.), BINOL (*S*)-**2a** (590 mg, 2.066 mmol, 1.1 equiv.) and Cs<sub>2</sub>CO<sub>3</sub> (1.34 g, 4.132 mmol, 2.2 equiv.) in MeOH was stirred for 1 h at room temperature. Orange red precipitate mixed with a red solution was observed. The precipitate was collected by filtration, washed with MeOH and dried under reduced pressure to give the corresponding C,O-chelated cyclometalated BINOL/gold(III) complex (*R,R*)-**3a** with dr > 99:1 as orange red solid. The filtrate was diluted with EA and washed with water. The resulting solution was concentrated

under reduced pressure and diluted by hexane to precipitate the crude BINOL/gold(III) complex (*R,S*)-**3a** with dr = 72:28 as orange red solid.

**Acid treatment:** The obtained (*R,R*)-**3a** was dissolved in DCM/MeOH (1:1, 20 mL) resulting in a red solution. After addition of 6 N hydrochloric acid (0.94 mL, 5.634 mmol, 3 equiv.) at room temperature, the color of the solution immediately changed from red to colorless within 1 min. The solvent was removed under reduced pressure to give a crude mixture of (*R*)-**1a** and (*S*)-**2a**. MeOH was added into the crude mixture and the resulting suspension was collected by filtration affording (*R*)-**1a** (99% ee) as white solid (360 mg, 0.676 mmol, 36% yield). Using the same method for (*R,S*)-**3a**, (*S*)-**1a** (44% ee) was obtained as white solid (480 mg, 0.902 mmol, 48% yield). Two filtrates were combined and purified flash column chromatography over silica gel to recover the BINOL (*S*)-**2a** (560 mg, 1.962 mmol, 95% yield).

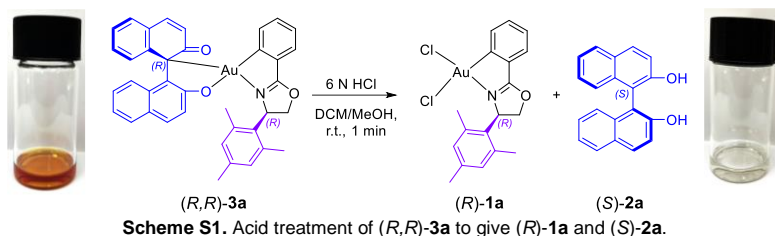

Repeat the diastereomeric resolution method with (*S*)-**1a** (44% ee) by changing the resolving agent to (*R*)-**2a** (284 mg, 0.992 mmol, 1.1 equiv) to give (*S,S*)-**3a** (dr = 99:1) and crude (*S,R*)-**3a** (dr = 78:22). After acid treatment for (*S,S*)-**3a**, (*S*)-**1a** (98% ee) was obtained (280 mg, 0.638 mmol, 34% yield) and BINOL (*R*)-**2a** was recovered (272 mg, 0.952 mmol, 96% yield).

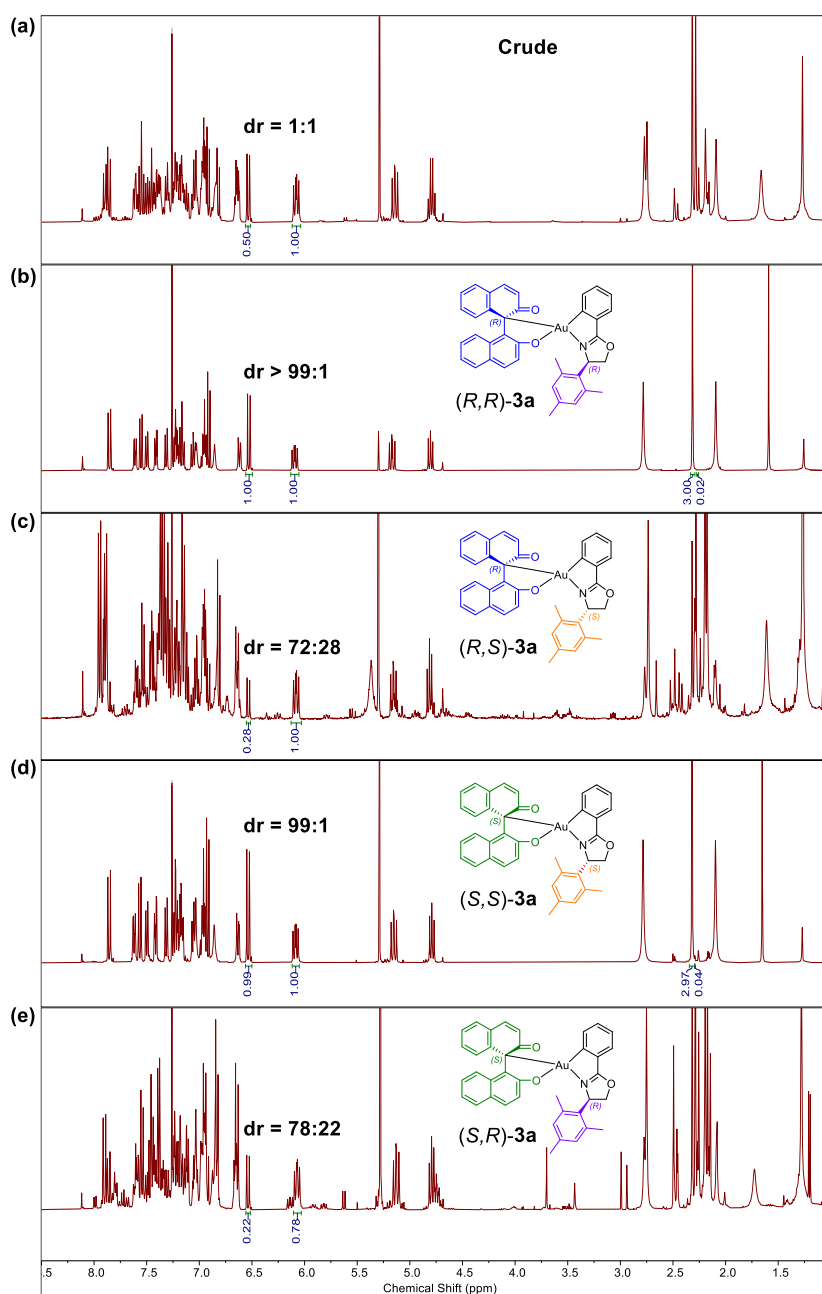

### (3) Preparation of BINOL/Gold(III) Complexes

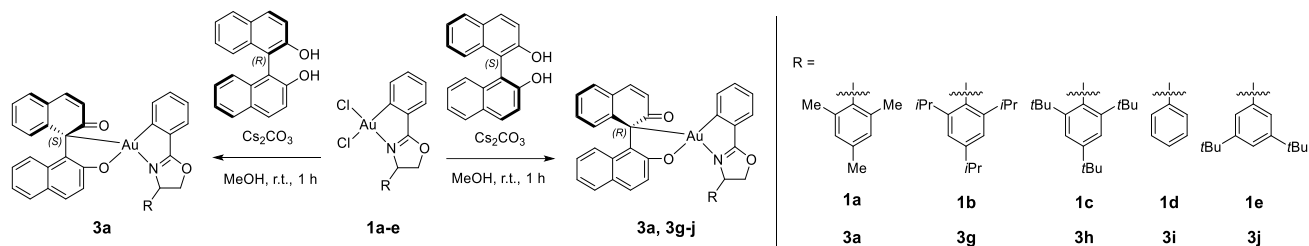

(*R,R*)-**3a** (602 mg, 0.808 mmol, 43% yield) and (*S,S*)-**3a** (504 mg, 0.676 mmol, 36% yield) can be prepared by the above diastereomeric resolution method using (*rac*)-**1a**.

(*R,S*)-**3a**: A mixture of enantiopure cyclometalated gold(III) complex (*S*)-**1a** (22.0 mg, 0.0413 mmol, 1.1 equiv.), BINOL (*S*)-**2a** (10.8 mg, 0.0376 mmol, 1.0 equiv.) and  $\text{Cs}_2\text{CO}_3$  (26.9 mg, 0.0826 mmol, 2.2 equiv.) in MeOH was stirred for 1 h at room temperature, giving an orange red solution. The resulting solution was filtered through celite. The filtrate was diluted with EA and washed with water. The resulting solution was concentrated under reduced pressure and diluted by hexane to precipitate BINOL/gold(III) complex as orange red solid (23.8 mg, 0.0320 mmol, 85% yield).

(*S,R*)-**3a**: A mixture of enantiopure cyclometalated gold(III) complex (*R*)-**1a** (22.0 mg, 0.0413 mmol, 1.1 equiv.), BINOL (*R*)-**2a** (10.8 mg, 0.0376 mmol, 1.0 equiv.) and  $\text{Cs}_2\text{CO}_3$  (26.9 mg, 0.0826 mmol, 2.2 equiv.) in MeOH was stirred for 1 h at room temperature, giving an orange red solution. The resulting solution was filtered through celite. The filtrate was diluted with EA and washed with water. The resulting solution was concentrated under reduced pressure and diluted by hexane to precipitate BINOL/gold(III) complex as orange red solid (25.2 mg, 0.0338 mmol, 90% yield).

(*R,R*)-**3g**, (*R,S*)-**3h**, (*R,R*)-**3i** and (*R,R*)-**3j**: A mixture of enantiopure cyclometalated gold(III) complex (*C*'N)AuCl<sub>2</sub> **1** (1.0 equiv.), BINOL (*S*)-**2a** (1.1 equiv.) and  $\text{Cs}_2\text{CO}_3$  (2.2 equiv.) in MeOH was stirred for 1 h at room temperature. Orange red precipitate was formed in a suspension. The precipitate was collected by filtration, washed with MeOH and dried under reduced pressure to give the corresponding C,O-chelated cyclometalated BINOL/gold(III) complexes (*R,R*)-**3g** (orange red solid, 78 mg, 0.0935 mmol, 85% yield), (*R,S*)-**3h** (salmon orange solid, 20 mg, 0.0229 mmol, 78% yield), (*R,R*)-**3i** (orange solid, 237 mg, 0.337 mmol, 82% yield) and (*R,R*)-**3j** (orange solid, 114 mg, 0.140 mmol, 82% yield).

### Synthesis of C,O-Chelated BINOL/Gold(III) Complexes **3b-3f** and Resolution of BINOLs **2b-2f**

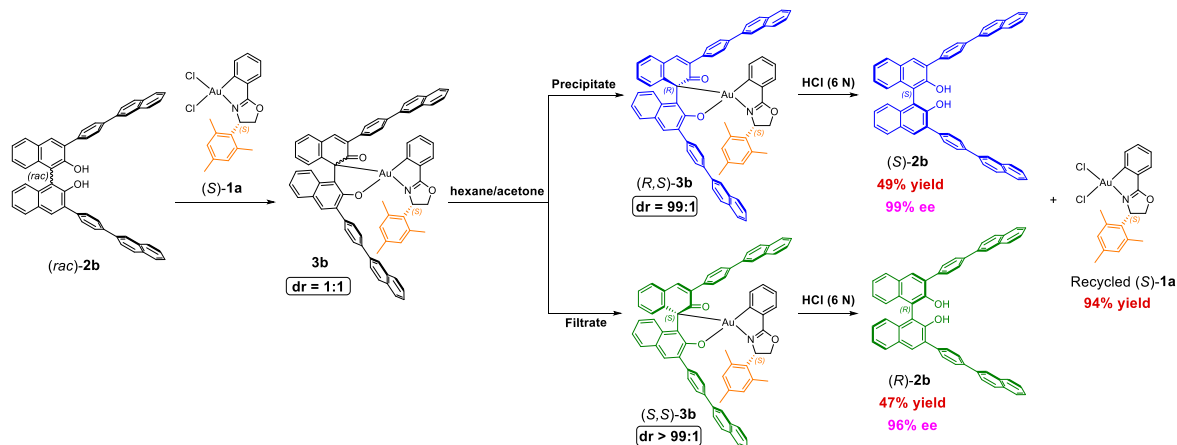

A mixture of gold(III) complex (*S*)-**1a** (22 mg, 0.0413 mmol, 1.1 equiv.), racemic BINOL (*rac*)-**2b** (25.9 mg, 0.0375 mmol, 1.0 equiv.) and  $\text{Cs}_2\text{CO}_3$  (26.9 mg, 0.0827 mmol, 2.2 equiv.) in MeOH (2 mL) was stirred for 1 h at room temperature. Orange red precipitate was formed in a suspension. The precipitate was collected by filtration affording the diastereomeric mixtures of **3b** with dr = 1:1. After addition of hexane/acetone (1:1, 4 mL), orange red precipitate mixed with a red solution was observed. The precipitate was collected to give BINOL/gold(III) complex (*R,S*)-**3b** with dr = 99:1 as orange red solid (21.6 mg, 0.0187 mmol, 50% yield). The filtrate was concentrated under reduced pressure and diluted by hexane to precipitate the BINOL/gold(III) complex (*S,S*)-**3b** with dr > 99:1 as orange red solid (21.1 mg, 0.0184 mmol, 49% yield).

The obtained (*R,S*)-**3b** and (*S,S*)-**3b** was separately dissolved in DCM/MeOH (1:1, 2 mL). After addition of 6 N hydrochloric acid (19  $\mu\text{L}$ , 0.0188 mmol, 3 equiv.) at room temperature, the color of the solution immediately changed from red to colorless within 1 min. The solvent was removed under reduced pressure and subjected to flash column chromatography (hexane/DCM), affording BINOL (*S*)-**2b** (white solid, 12.7 mg, 0.0184 mmol, 49% yield, 99% ee), BINOL (*R*)-**2b** (white solid, 12.2 mg, 0.0176 mmol, 47% yield, 96% ee) and recovered (*S*)-**1a** (20.7 mg, 0.0388 mmol, 94% yield).



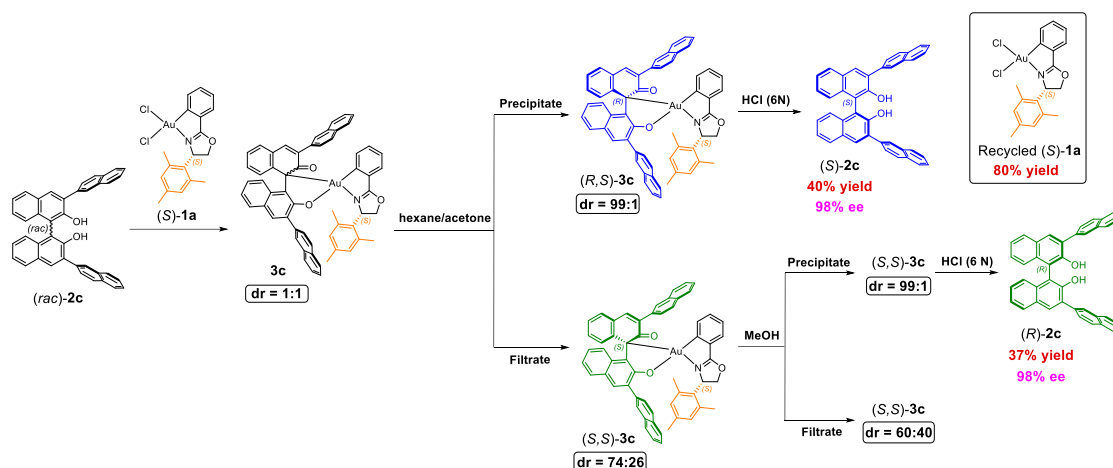

A mixture of gold(III) complex **(S)-1a** (22 mg, 0.0413 mmol, 1.1 equiv.), racemic BINOL **(rac)-2c** (20.2 mg, 0.0375 mmol, 1.0 equiv.) and  $\text{Cs}_2\text{CO}_3$  (26.9 mg, 0.0827 mmol, 2.2 equiv.) in MeOH (2 mL) was stirred for 1 h at room temperature. The reaction mixture was diluted with DCM and washed with water. The resulting solution was concentrated under reduced pressure affording the diastereomeric mixture **3c** with dr = 1:1. After addition of hexane/acetone (5:1, 12 mL), orange red precipitate mixed with a red solution was observed. The precipitate was collected to give BINOL/gold(III) complex **(R,S)-3c** with dr = 99:1 as orange red solid (15.7 mg, 0.0157 mmol, 42% yield). The filtrate was concentrated under reduced pressure and diluted by hexane to precipitate the crude BINOL/gold(III) complex **(S,S)-3c** with dr = 74:26 as orange red solid. MeOH (5 mL) was subsequently added to the obtained crude **(S,S)-3c**. Orange red precipitate mixed with pale yellow solution was observed. The precipitate was collected by filtration to give BINOL/gold(III) complex **(S,S)-3c** with dr = 99:1 as orange red solid (14.6 mg, 0.0146 mmol, 39% yield).

The obtained **(R,S)-3c** and **(S,S)-3c** was separately added in DCM/MeOH (1:1, 2 mL). After addition of 6 N hydrochloric acid (19  $\mu\text{L}$ , 0.0188 mmol, 3 equiv.) at room temperature, the color of the solution immediately changed from red to colorless within 1 min. The solvent was removed under reduced pressure and subjected to flash column chromatography (hexane/DCM), affording BINOL **(S)-2c** (white solid, 8.1 mg, 0.0150 mmol, 40% yield, 98% ee), BINOL **(R)-2c** (white solid, 7.5 mg, 0.0139 mmol, 37% yield, 98% ee) and recovered **(S)-1a** (17.6 mg, 0.0330 mmol, 80% yield).

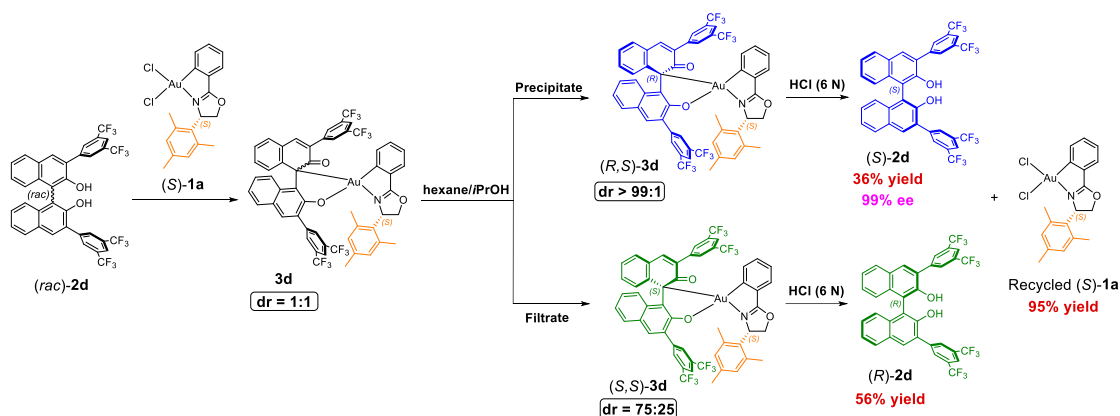

A mixture of gold(III) complex **(S)-1a** (22 mg, 0.0413 mmol, 1.1 equiv.), racemic BINOL **(rac)-2d** (27.9 mg, 0.0375 mmol, 1.0 equiv.) and  $\text{Cs}_2\text{CO}_3$  (26.9 mg, 0.0827 mmol, 2.2 equiv.) in MeOH (2 mL) was stirred for 1 h at room temperature. The resulting solution was concentrated under reduced pressure affording the diastereomeric mixtures of **3d** with dr = 1:1. After addition of hexane/*i*PrOH (9:1, 20 mL), yellow precipitate mixed with a red solution was observed. The precipitate was collected to give BINOL/gold(III) complex **(R,S)-3d** with dr > 99:1 as orange red solid (17.5 mg, 0.0150 mmol, 40% yield). The filtrate was concentrated under reduced pressure and diluted by hexane to precipitate the crude BINOL/gold(III) complex **(S,S)-3d** with dr = 75:25 as yellow solid.

The obtained **(R,S)-3d** and crude **(S,S)-3d** was separately dissolved in EA/MeOH (1:1, 2 mL). After addition of 6 N hydrochloric acid (19  $\mu\text{L}$ , 0.0188 mmol, 3 equiv.) at room temperature, the color of the solution immediately changed from red to colorless within 1 min. The solvent was removed under reduced pressure and subjected to flash column chromatography (hexane/DCM), affording BINOL **(S)-2d** (white solid, 10.0 mg, 0.0135 mmol, 36% yield, 99% ee), BINOL **(R)-2d** (white solid, 15.6 mg, 0.0210 mmol, 56% yield, 50% ee) and recovered **(S)-1a** (20.9 mg, 0.0392 mmol, 95% yield).

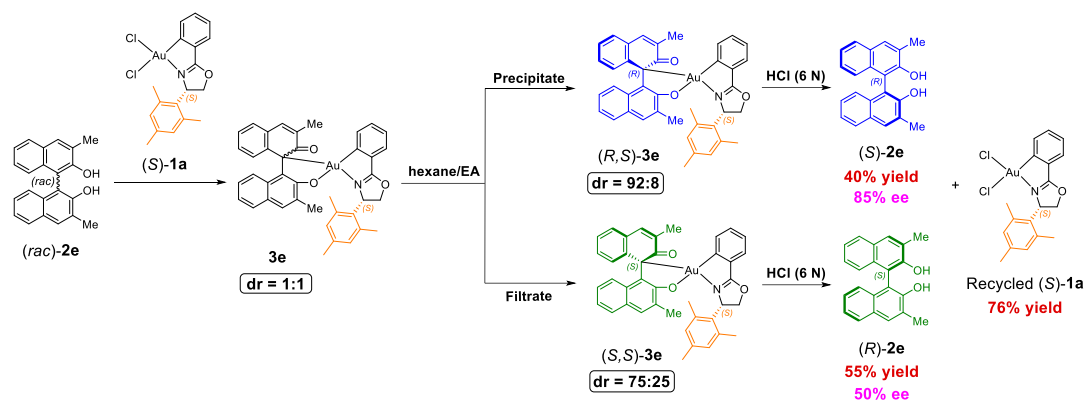

A mixture of gold(III) complex **(S)-1a** (22 mg, 0.0413 mmol, 1.1 equiv.), racemic BINOL **(rac)-2e** (11.8 mg, 0.0375 mmol, 1.0 equiv.) and  $\text{Cs}_2\text{CO}_3$  (26.9 mg, 0.0827 mmol, 2.2 equiv.) in MeOH (2 mL) was stirred for 1 h at room temperature. The reaction mixture was diluted with DCM and washed with water. The resulting solution was concentrated under reduced pressure affording the diastereomeric mixtures of **3e** with dr = 1:1. After addition of hexane/EA (2:1, 12 mL), orange red precipitate mixed with red solution was observed. The precipitate was collected to give BINOL/gold(III) complex **(R,S)-3e** with dr = 92:8 as orange red solid (12.2 mg, 0.0157 mmol, 42% yield). The filtrate was concentrated under reduced pressure and diluted by hexane to precipitate the crude BINOL/gold(III) complex **(S,S)-3e** with dr = 75:25 as orange red solid.

The obtained **(R,S)-3e** and crude **(S,S)-3e** was separately added in DCM/MeOH (1:1, 2 mL). After addition of 6 N hydrochloric acid (19  $\mu\text{L}$ , 0.0188 mmol, 3 equiv.) at room temperature, the color of the solution immediately changed from red to colorless within 1 min. The solvent was removed under reduced pressure and subjected to flash column chromatography (hexane/DCM), affording BINOL **(S)-2e** (white solid, 4.7 mg, 0.0150 mmol, 40% yield, 85% ee), BINOL **(R)-2e** (white solid, 6.5 mg, 0.0206 mmol, 55% yield, 50% ee) and recovered **(S)-1a** (16.7 mg, 0.0314 mmol, 76% yield).

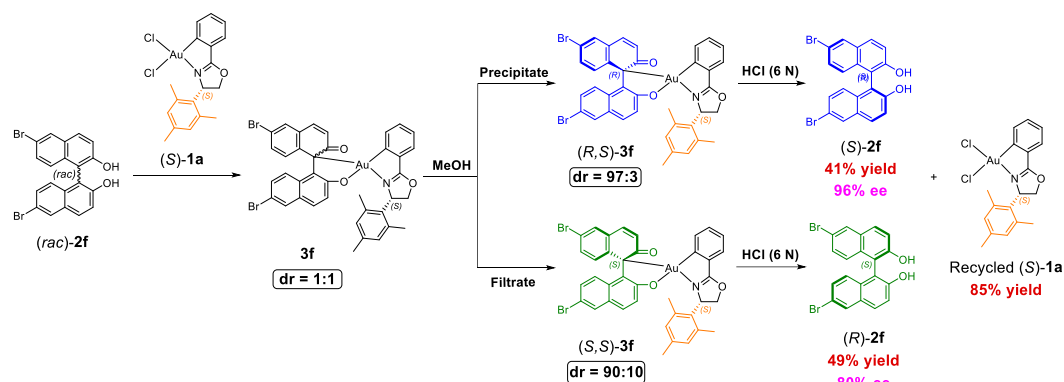

A mixture of gold(III) complex **(S)-1a** (28 mg, 0.0525 mmol, 1.4 equiv.), racemic BINOL **(rac)-2f** (16.7 mg, 0.0375 mmol, 1.0 equiv.) and  $\text{Cs}_2\text{CO}_3$  (34.2 mg, 0.105 mmol, 2.8 equiv.) in MeOH (1 mL) was stirred for 1 h at room temperature. Orange red precipitate was formed in a suspension. The precipitate was collected by filtration affording the diastereomeric mixtures of **3f** with dr = 1:1. After addition of MeOH (10 mL), orange red precipitate mixed with red solution was observed. The precipitate was collected to give BINOL/gold(III) complex **(R,S)-3f** with dr = 97:3 as orange red solid (14.2 mg, 0.0157 mmol, 43% yield). The filtrate was concentrated under reduced pressure and diluted by hexane to precipitate the BINOL/gold(III) complex **(S,S)-3f** with dr = 90:10 as orange red solid (17.9 mg, 0.0199 mmol, 53% yield).

The obtained **(R,S)-3f** and **(S,S)-3f** was separately added in DCM/MeOH (1:1, 2 mL). After addition of 6 N hydrochloric acid (19  $\mu\text{L}$ , 0.0188 mmol, 3 equiv.) at room temperature, the color of the solution immediately changed from red to colorless within 1 min. The solvent was removed under reduced pressure and subjected to flash column chromatography (hexane/DCM), affording compound BINOL **(S)-2f** (white solid, 6.8 mg, 0.0154 mmol, 41% yield, 96% ee), BINOL **(R)-2f** (white solid, 8.2 mg, 0.0184 mmol, 49% yield, 80% ee) and recovered **(S)-1a** (23.8 mg, 0.0446 mmol, 85% yield).

(1)  $^1\text{H}$  NMR Analysis for Determination of Diastereomeric Ratio of 3b-3f

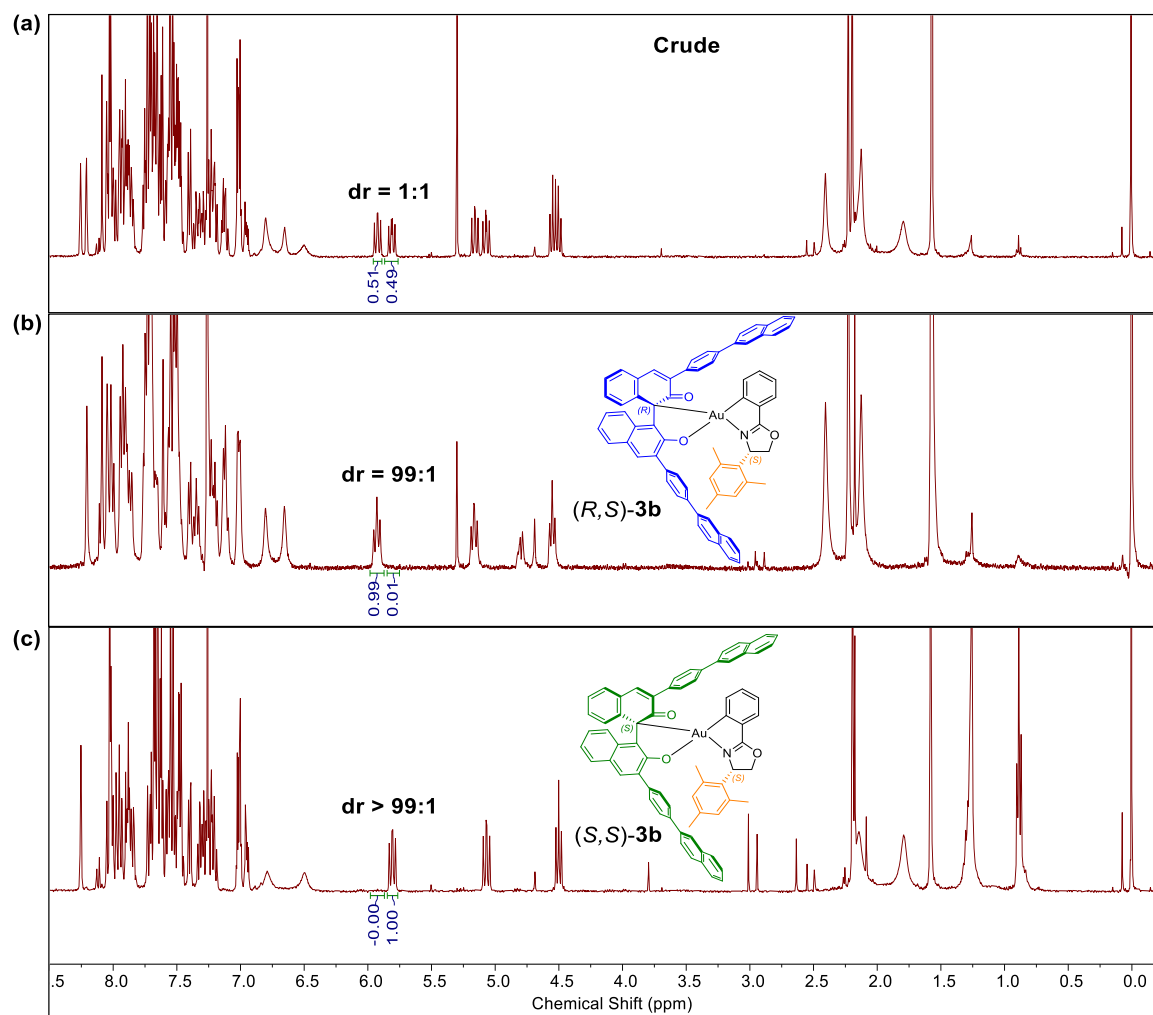

Figure S2. Determination of dr of (a) crude mixture of 3b; (b)  $(R,S)$ -3b; (c)  $(S,S)$ -3b by  $^1\text{H}$  NMR analysis.

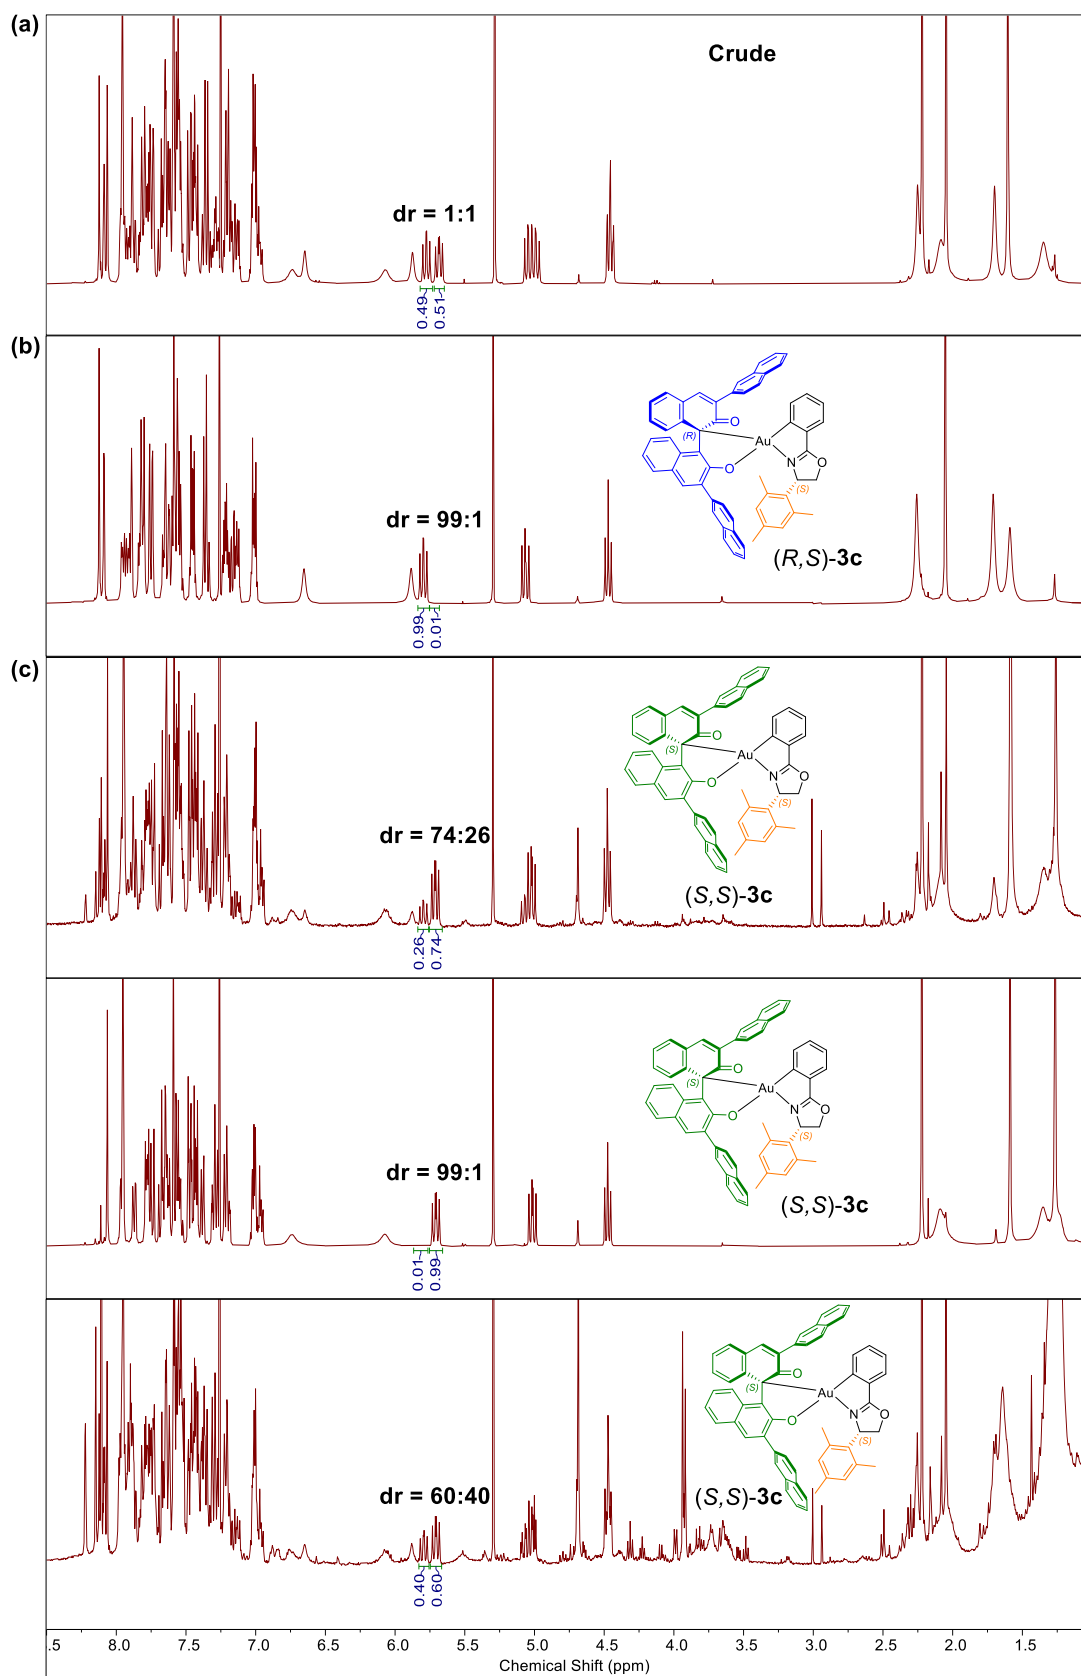

**Figure S3.** Determination of dr of (a) crude mixture of **3c**; (b) *(R,S)*-**3c**; (c) *(S,S)*-**3c** by  $^1\text{H}$  NMR analysis.

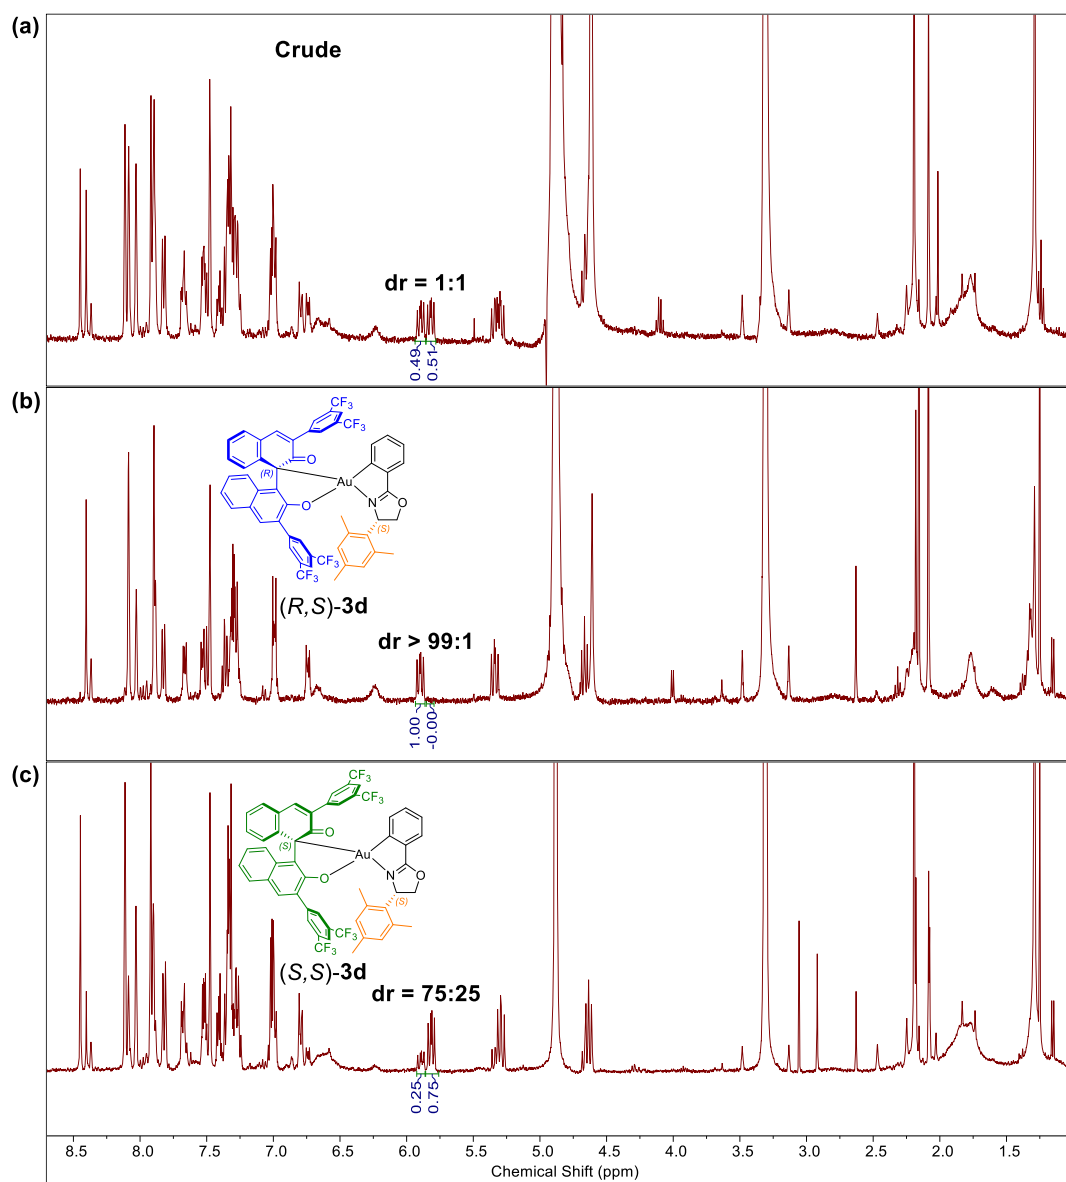

**Figure S4.** Determination of dr of (a) crude mixture of **3d**; (b) **(R,S)-3d**; (c) **(S,S)-3d** by  $^1\text{H}$  NMR analysis.

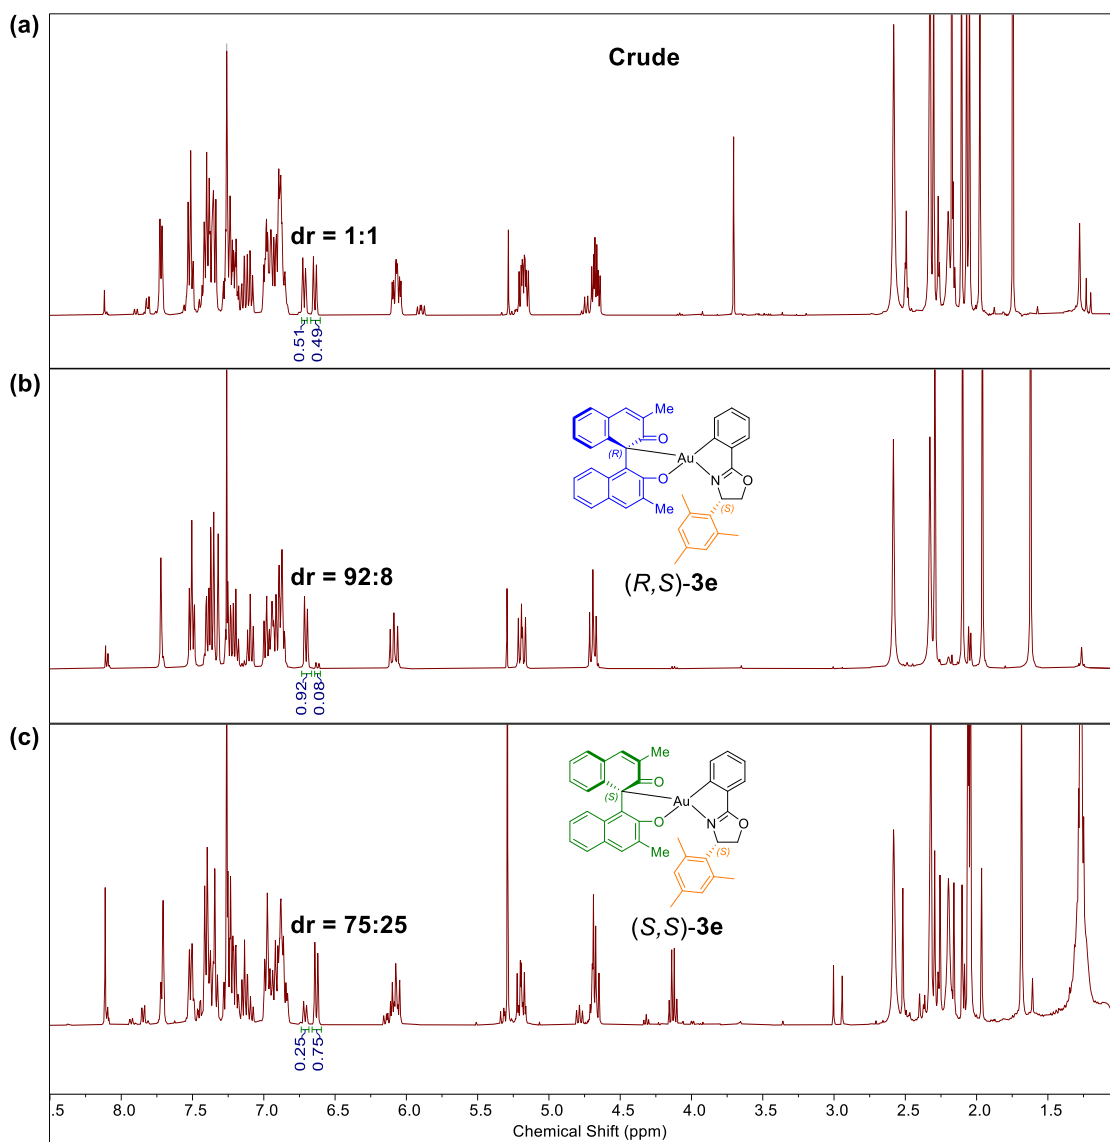

**Figure S5.** Determination of dr of (a) crude mixture of **3e**; (b) (*R,S*)-**3e**; (c) (*S,S*)-**3e** by  $^1\text{H}$  NMR analysis.

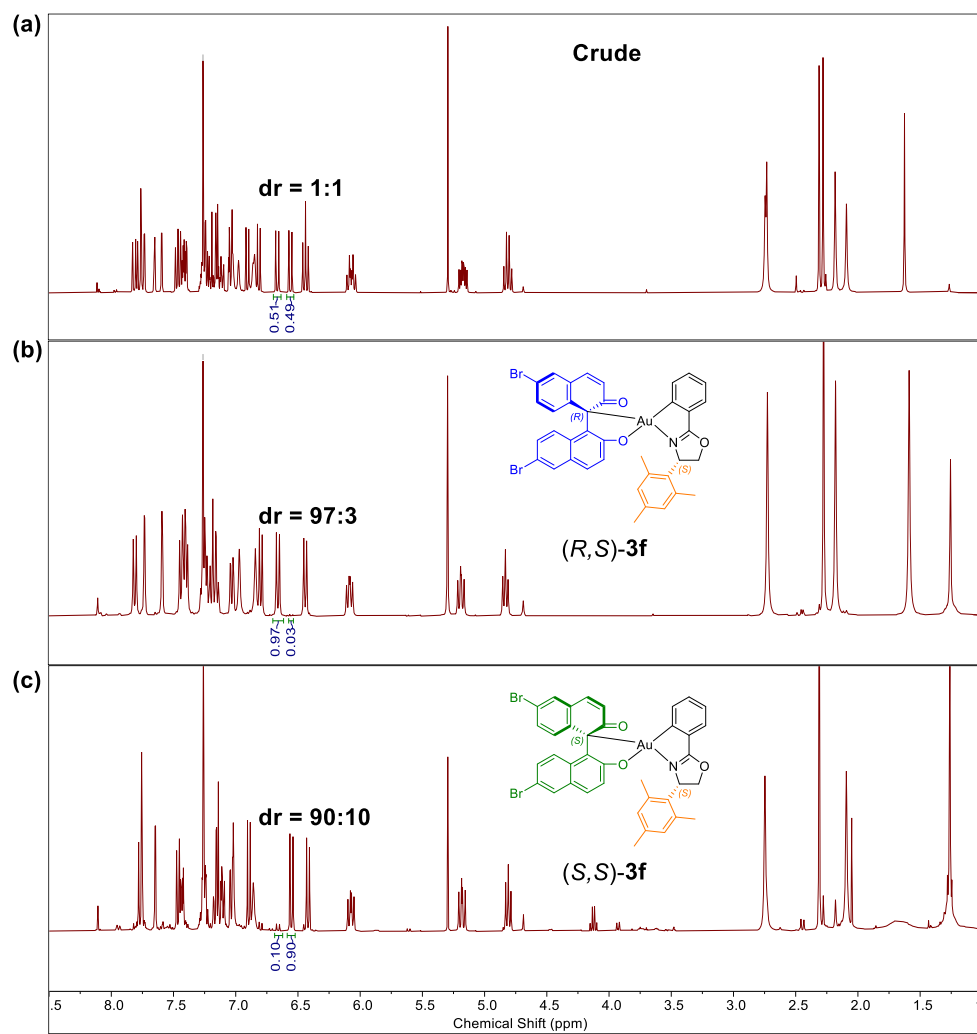

**Figure S6.** Determination of dr of (a) crude mixture of **3f**; (b) **(R,S)-3f**; (c) **(S,S)-3f** by  $^1\text{H}$  NMR analysis.

## (2) HPLC Analysis of Resolved BINOLs 2b-2f

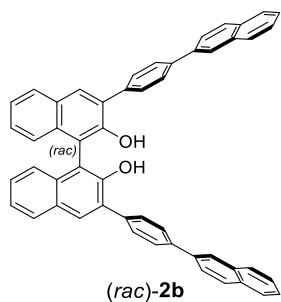

Chiralpak IC column,  
55:45 hexane/isopropanol, 1 mL/min,  
 $t_R = 10.1$  min, 19.6 min,  
ee = 0%.

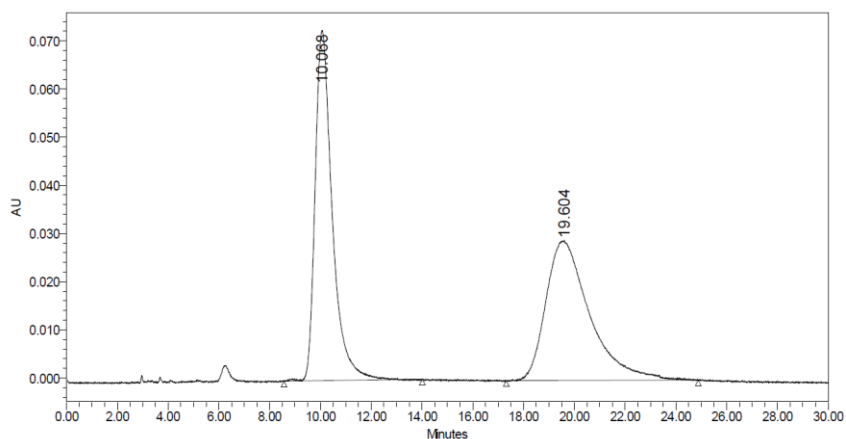

|   | RT     | Area    | % Area | Height |
|---|--------|---------|--------|--------|
| 1 | 10.068 | 3407855 | 49.57  | 72703  |
| 2 | 19.604 | 3467350 | 50.43  | 29070  |

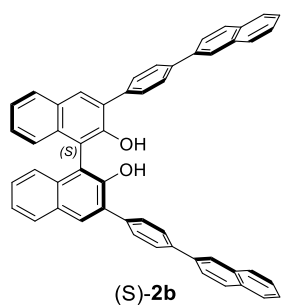

Chiralpak IC column,  
55:45 hexane/isopropanol, 1 mL/min,  
 $t_R = 10.1$  min (major), 19.1 min (minor),  
ee = 99%.

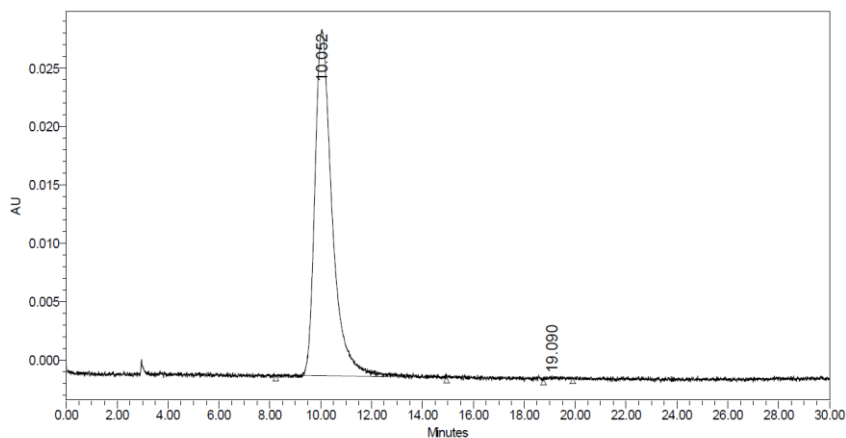

|   | RT     | Area    | % Area | Height |
|---|--------|---------|--------|--------|
| 1 | 10.052 | 1402756 | 99.62  | 29687  |
| 2 | 19.090 | 5306    | 0.38   | 261    |

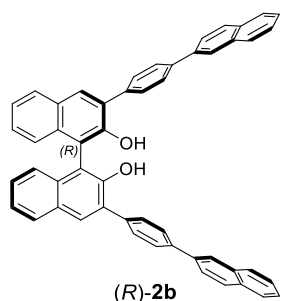

Chiralpak IC column,  
55:45 hexane/isopropanol, 1 mL/min,  
 $t_R = 10.7$  min (minor), 21.2 min (major),  
ee = 96%.

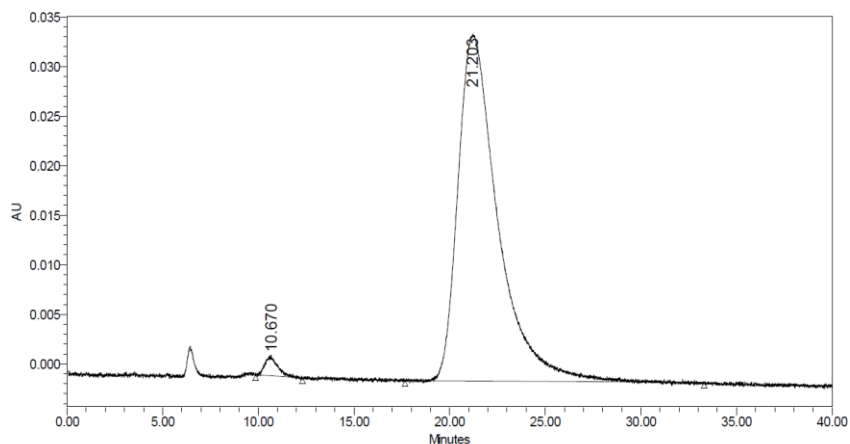

|   | RT     | Area    | % Area | Height |
|---|--------|---------|--------|--------|
| 1 | 10.670 | 91573   | 1.77   | 2086   |
| 2 | 21.203 | 5088501 | 98.23  | 34982  |



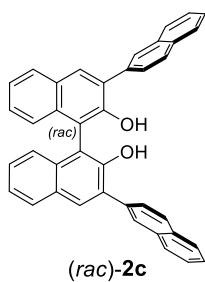

Chiralpak AD-H column,  
55:45 hexane/isopropanol, 1 mL/min,  
 $t_R = 13.2$  min, 27.1 min,  
ee = 0%.

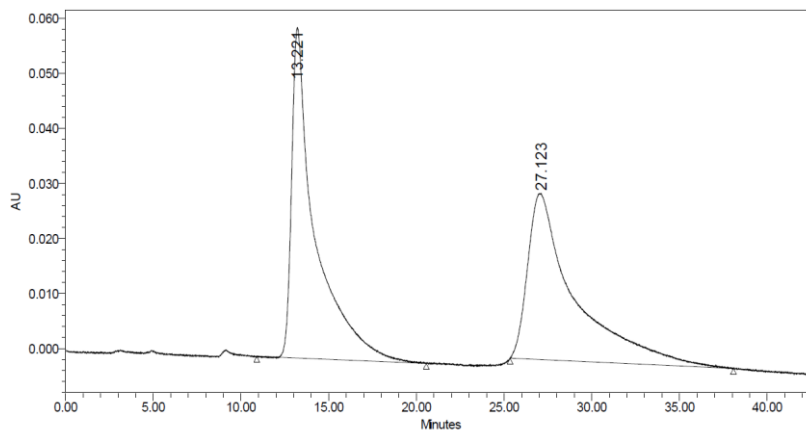

|   | RT     | Area    | % Area | Height |
|---|--------|---------|--------|--------|
| 1 | 13.221 | 5547564 | 49.86  | 60060  |
| 2 | 27.123 | 5578178 | 50.14  | 30224  |

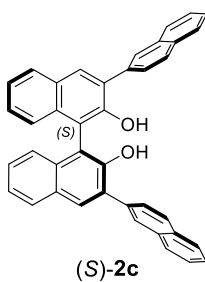

Chiralpak AD-H column,  
55:45 hexane/isopropanol, 1 mL/min,  
 $t_R = 13.1$  min (minor), 26.6 min (major),  
ee = 98%.

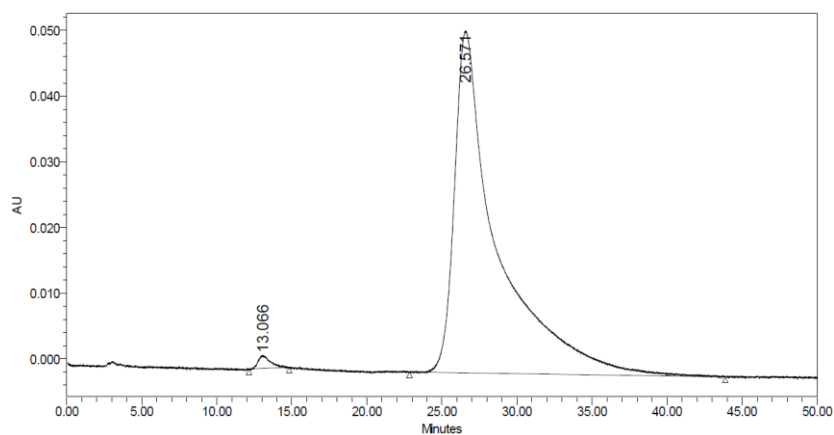

|   | RT     | Area     | % Area | Height |
|---|--------|----------|--------|--------|
| 1 | 13.066 | 111180   | 1.07   | 2013   |
| 2 | 26.571 | 10291249 | 98.93  | 52032  |

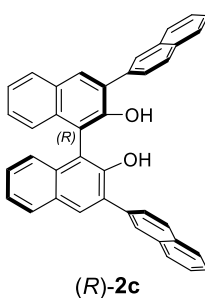

Chiralpak AD-H column,  
55:45 hexane/isopropanol, 1 mL/min,  
 $t_R = 13.0$  min (major), 26.7 min (minor),  
ee = 98%.

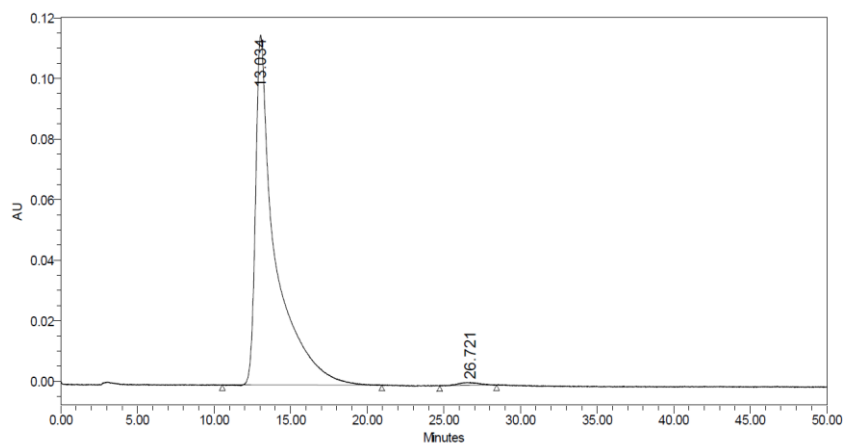

|   | RT     | Area     | % Area | Height |
|---|--------|----------|--------|--------|
| 1 | 13.034 | 10292059 | 99.14  | 115506 |
| 2 | 26.721 | 89427    | 0.86   | 1036   |

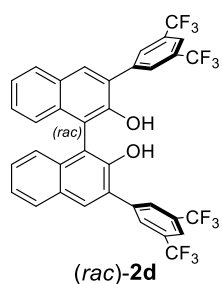

Chiralpak AD-H column,  
 99:1 hexane/isopropanol, 0.5 mL/min,  
 $t_R = 7.0$  min,  $7.7$  min,  
 ee = 0%.

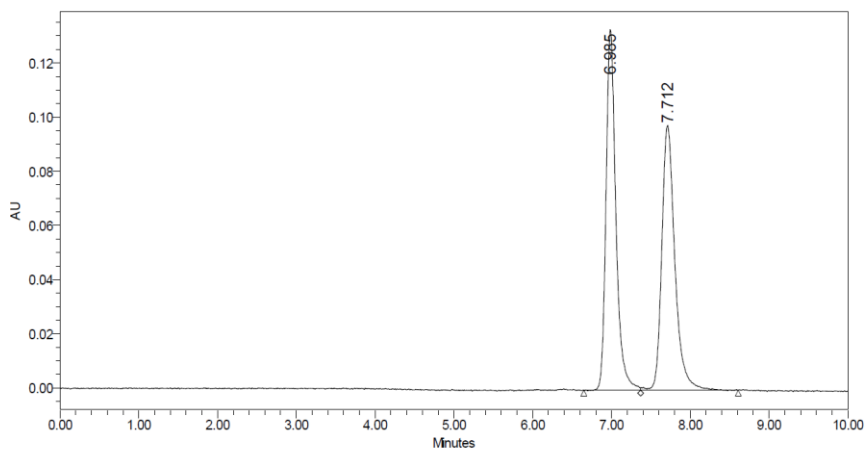

|   | RT    | Area    | % Area | Height |
|---|-------|---------|--------|--------|
| 1 | 6.985 | 1155465 | 50.60  | 133081 |
| 2 | 7.712 | 1127890 | 49.40  | 97675  |

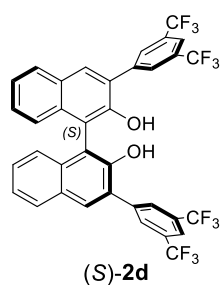

Chiralpak AD-H column,  
 99:1 hexane/isopropanol, 0.5 mL/min,  
 $t_R = 6.8$  min (major),  $7.3$  min (minor),  
 ee = 99%.

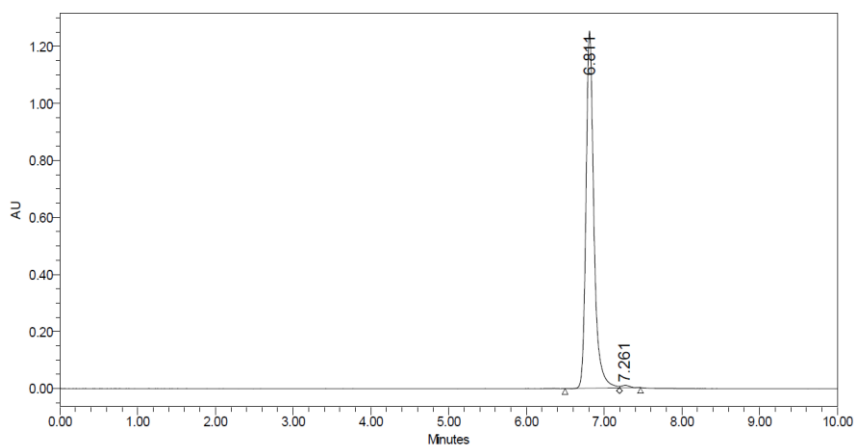

|   | RT    | Area    | % Area | Height  |
|---|-------|---------|--------|---------|
| 1 | 6.811 | 8838431 | 99.31  | 1252022 |
| 2 | 7.261 | 61777   | 0.69   | 8458    |

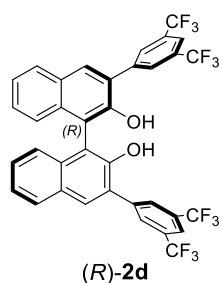

Chiralpak AD-H column,  
 99:1 hexane/isopropanol, 0.5 mL/min,  
 $t_R = 6.8$  min (minor),  $7.2$  min (major),  
 ee = 50%.

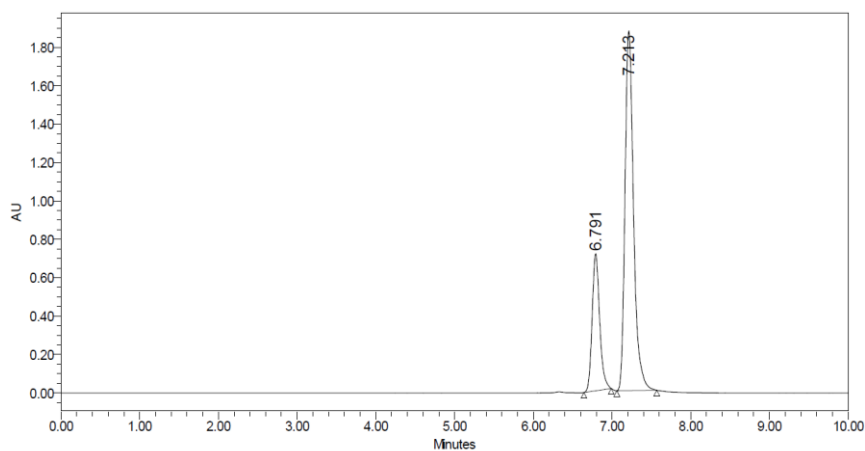

|   | RT    | Area     | % Area | Height  |
|---|-------|----------|--------|---------|
| 1 | 6.791 | 4722529  | 25.08  | 712671  |
| 2 | 7.213 | 14106097 | 74.92  | 1872273 |

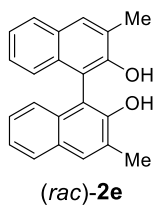

Chiralpak IC column,  
98:2 hexane/isopropanol, 1 mL/min,  
 $t_R = 4.4$  min, 4.9 min,  
ee = 0%.

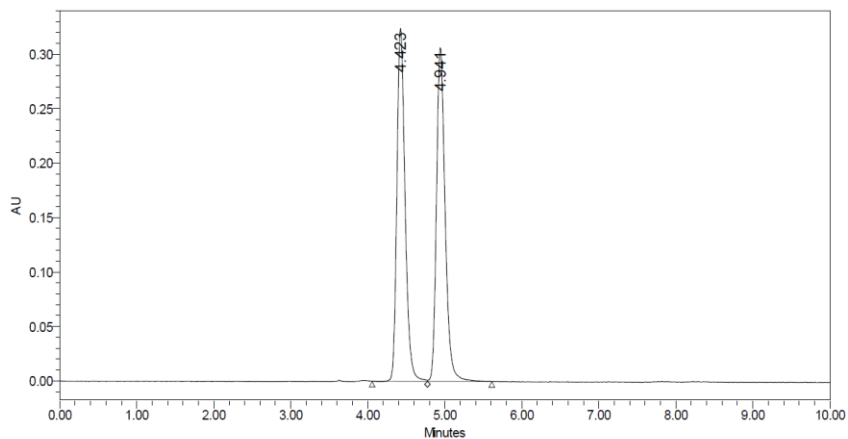

|   | RT    | Area    | % Area | Height |
|---|-------|---------|--------|--------|
| 1 | 4.423 | 2396054 | 50.06  | 324145 |
| 2 | 4.941 | 2390388 | 49.94  | 306579 |

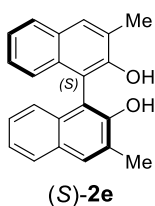

Chiralpak IC column,  
98:2 hexane/isopropanol, 1 mL/min,  
 $t_R = 4.4$  min (minor), 4.9 min (major),  
ee = 85%.

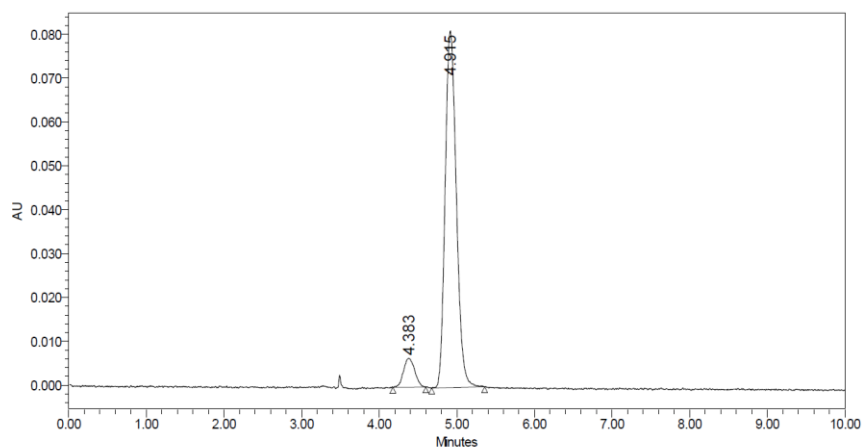

|   | RT    | Area   | % Area | Height |
|---|-------|--------|--------|--------|
| 1 | 4.383 | 65677  | 7.49   | 6544   |
| 2 | 4.915 | 811170 | 92.51  | 81283  |

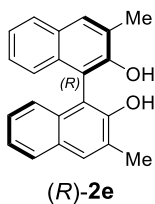

Chiralpak IC column,  
98:2 hexane/isopropanol, 1 mL/min,  
 $t_R = 4.4$  min (major), 5.0 min (minor),  
ee = 50%.

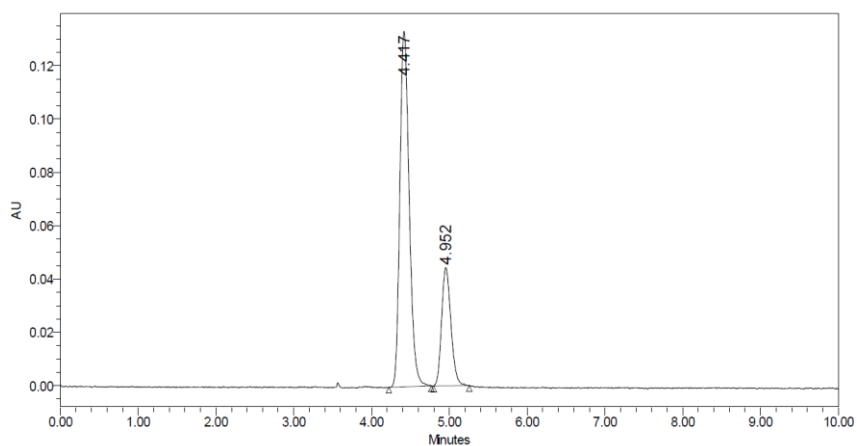

|   | RT    | Area    | % Area | Height |
|---|-------|---------|--------|--------|
| 1 | 4.417 | 1108486 | 75.02  | 133269 |
| 2 | 4.952 | 369118  | 24.98  | 44338  |

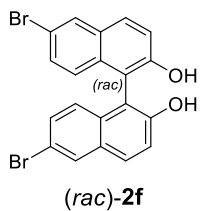

Chiralpak IC column,  
95:5 hexane/isopropanol, 1 mL/min,  
 $t_R = 7.7$  min, 10.8 min,  
ee = 0%.

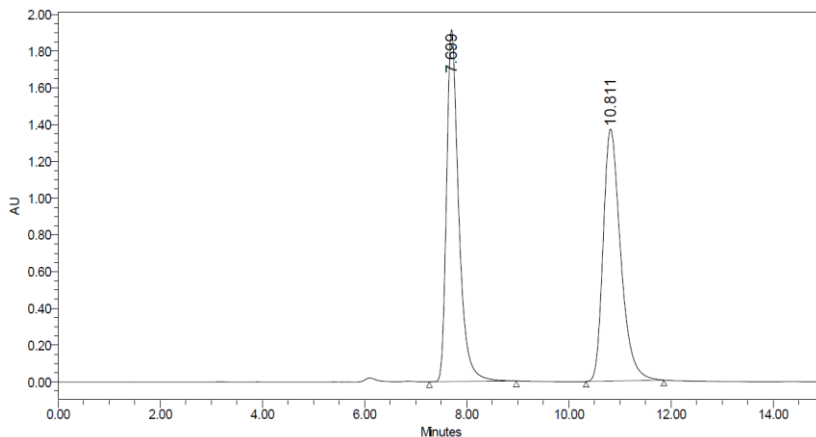

|   | RT     | Area     | % Area | Height  |
|---|--------|----------|--------|---------|
| 1 | 7.699  | 31596231 | 49.23  | 1914315 |
| 2 | 10.811 | 32588649 | 50.77  | 1370909 |

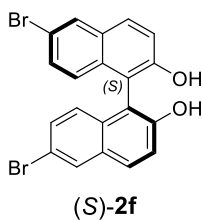

Chiralpak IC column,  
95:5 hexane/isopropanol, 1 mL/min,  
 $t_R = 7.7$  min (minor), 10.8 min (major),  
ee = 96%.

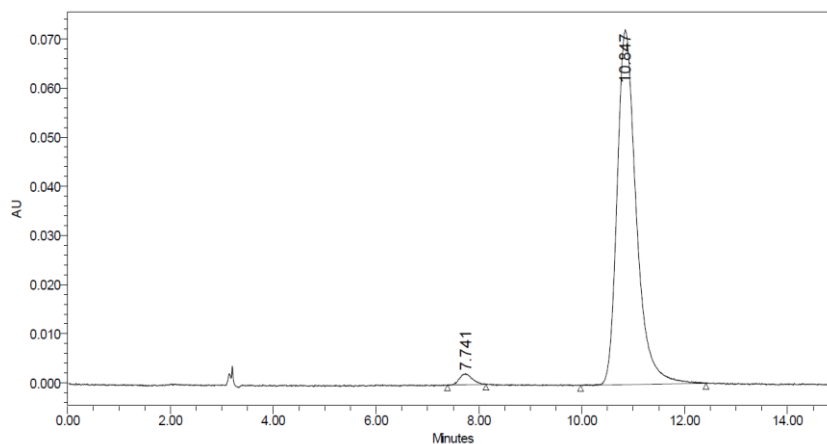

|   | RT     | Area    | % Area | Height |
|---|--------|---------|--------|--------|
| 1 | 7.741  | 38545   | 2.03   | 2266   |
| 2 | 10.847 | 1863208 | 97.97  | 72205  |

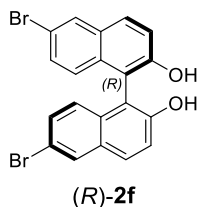

Chiralpak IC column,  
95:5 hexane/isopropanol, 1 mL/min,  
 $t_R = 7.7$  min (major), 10.9 min (minor),  
ee = 80%.

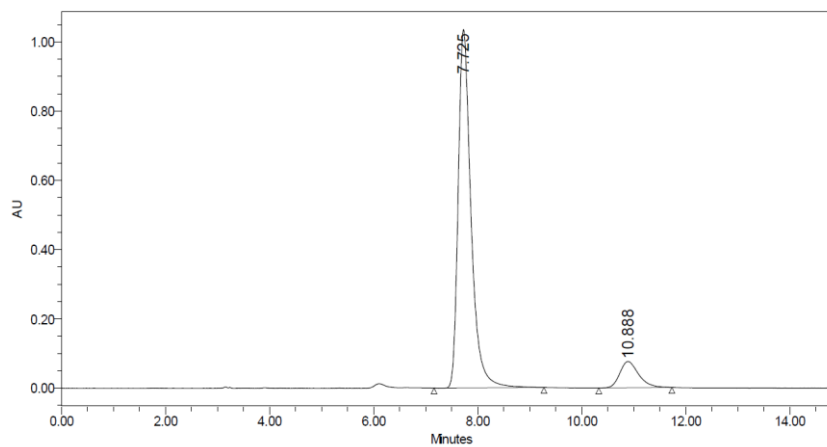

|   | RT     | Area     | % Area | Height  |
|---|--------|----------|--------|---------|
| 1 | 7.725  | 17699961 | 90.28  | 1035064 |
| 2 | 10.888 | 1904821  | 9.72   | 75778   |

## Synthesis of Substrates 4a-m

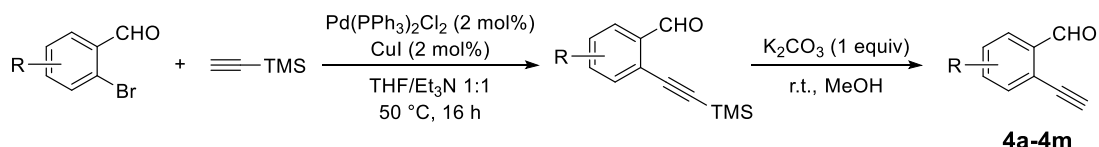

Substrates **4a-4e**, **4g-4m** were synthesized and identified with reference to the characterization data of literatures.<sup>5-13</sup> For synthesis of **4f**, a mixture of 2-bromo-6-methylbenzaldehyde (3 mmol, 1.0 equiv), Pd(PPh<sub>3</sub>)<sub>2</sub>Cl<sub>2</sub> (0.06 mmol, 0.02 equiv.) and CuI (0.06 mmol, 0.02 equiv.) in THF/Et<sub>3</sub>N (1:1, 10 mL) was degassed by three freeze-pump-thaw cycles. Then, trimethylsilylacetylene (4.5 mmol, 1.5 equiv.) was added to the mixture by syringe. The reaction mixture was heated to 50 °C for 16 h. When the reaction is completed, the resulting mixture was filtered through celite. The filtrate was concentrated under reduced pressure and the residue was purified by column chromatography over silica gel with hexane/EA as the eluent to give the corresponding reaction intermediate (86% yield). The reaction intermediate was then treated with K<sub>2</sub>CO<sub>3</sub> (0.56 g, 2.58 mmol) in MeOH (10 mL) at room temperature. When the reaction was completed, as monitored by TLC, water was added. The residue was extracted with CH<sub>2</sub>Cl<sub>2</sub> and dried over MgSO<sub>4</sub>. The filtrate was concentrated under reduced pressure and purified by flash column chromatography over silica gel with n-hexane/EA to give **4f** (pale yellow solid, 0.19 g, 1.34 mmol, 52% yield).

## General Procedure for Gold(III) Catalyzed Asymmetric Carboalkoxylation of *ortho*-Alkynylbenzaldehydes

The asymmetric carboalkoxylation affording **5a** is representative. Substrate **4a** (0.20 mmol) was added to a mixture of gold(III) catalyst (*R,R*-**3a** (0.010 mmol, 5 mol %) and D-camporsulfonic acid (0.005 mmol, 2.5 mol %) in MeOH (2 mL). The reaction mixture was stirred at room temperature for 16 h. The reaction mixture was concentrated under reduced pressure and purified by flash column chromatography over silica gel with hexane/EA to afford **5a** as pale yellow oil. This general procedure was applied to **5b-5m**. For **5n-5o**, MeOH was replaced by EtOH. Racemic samples were obtained with KAuCl<sub>4</sub>·2H<sub>2</sub>O as catalyst and no addition of acid. Products **5a**, **5c**, **5g-5h**, **5l-5m** were identified with reference to the characterization data in literatures.<sup>[1,3]</sup>

### Previous preparation methods of chiral oxazoline-based gold(III) dichloride complexes **1**

#### (1) Use of chiral preparative HPLC

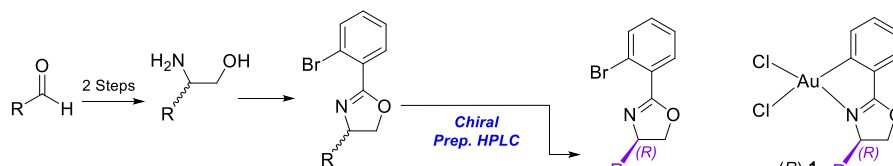

#### (2) Use of chiral building blocks

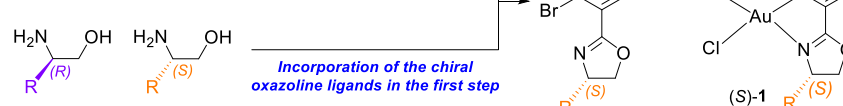

#### Limitations :

- ▶ Use of expensive preparative HPLC
- ▶ Time-consuming multistep synthesis
- ▶ Limited to small-scale synthesis
- ▶ Limited commercial source of chiral reagents

### This work : Preparation of enantiopure gold(III) complexes **1** by diastereomeric resolution

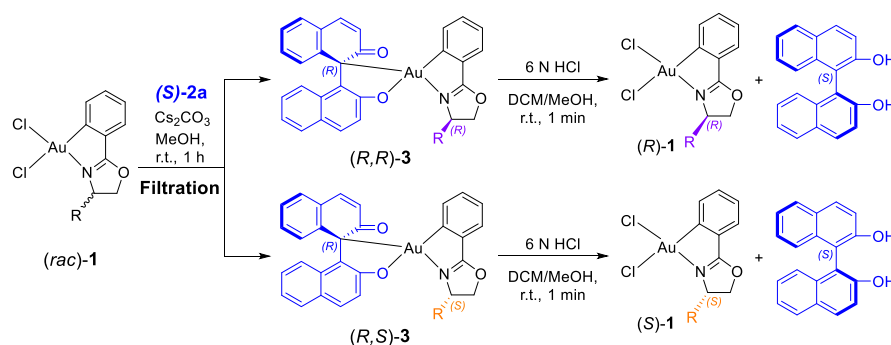

- ▶ Separation by filtration
- ▶ Excellent yields
- ▶ Simplified preparation and purification steps
- ▶ Low-cost
- ▶ Short reaction time

**Scheme S2.** Comparison of previous methods for the preparation of chiral oxazoline-based gold(III) complexes with this work.

## Study of Carboalkoxylation of *ortho*-Alkynylbenzaldehydes

**Table S1.** Study of the effect of the chirality of CSA on the reaction enantioselectivity.<sup>a</sup>

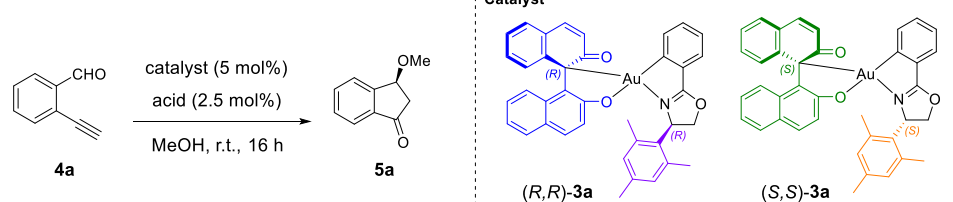

| Entry | Catalyst                  | Acid  | Yield (%) <sup>b</sup> | ee (%) <sup>c</sup> |
|-------|---------------------------|-------|------------------------|---------------------|
| 1     | ( <i>R,R</i> )- <b>3a</b> | L-CSA | 38                     | 80                  |
| 2     | ( <i>R,R</i> )- <b>3a</b> | D-CSA | 47                     | 89                  |
| 3     | ( <i>S,S</i> )- <b>3a</b> | L-CSA | 38                     | -85                 |
| 4     | ( <i>S,S</i> )- <b>3a</b> | D-CSA | 41                     | -89                 |

<sup>a</sup> Reaction conditions: 0.2 mmol of substrate **4a**, 2 mL of MeOH. <sup>b</sup> Isolated yield. <sup>c</sup> Determined by chiral HPLC.

In entries 1 and 2, the use of (*R,R*)-**3a** with L-CSA afforded the product with 80% ee which was slightly lower than that with D-CSA (89% ee). In entries 3 and 4, the use of (*S,S*)-**3a** with L-CSA or D-CSA afforded products with similar ee (-85% and -89% respectively). These results indicated that the chirality of CSA only has limited effect on the reaction enantioselectivity.

**Table S2.** <sup>1</sup>H NMR yield of carboalkoxylation of 2-ethynylbenzaldehyde **4a** using **3a** as catalysts.<sup>a</sup>

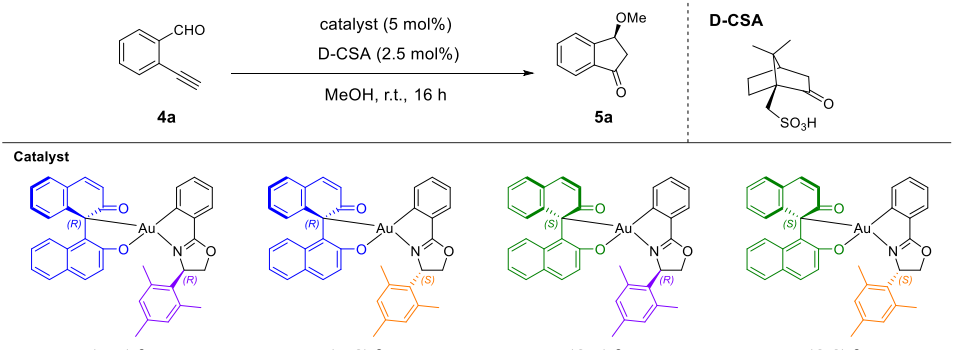

| Entry | Catalyst                  | <sup>1</sup> H NMR Yield (%) <sup>b</sup> |
|-------|---------------------------|-------------------------------------------|
| 1     | ( <i>R,R</i> )- <b>3a</b> | 50                                        |
| 2     | ( <i>R,S</i> )- <b>3a</b> | 35                                        |
| 3     | ( <i>S,R</i> )- <b>3a</b> | 38                                        |
| 4     | ( <i>S,S</i> )- <b>3a</b> | 49                                        |

<sup>a</sup> Reaction conditions: 5 mol% of different catalysts, 2.5 mol% of D-CSA, 0.2 mmol of substrate **4a**, 2 mL of MeOH. <sup>b</sup> Yields were determined by <sup>1</sup>H NMR spectroscopy with 1,3,5-trimethoxybenzene as an internal standard.

The enantiomer pair (*R,R*)-**3a** and (*S,S*)-**3a** afforded product **5a** with 50% yield and 49% yield respectively, while the other enantiomer pair (*R,S*)-**3a** and (*S,R*)-**3a** gave 35% yield and 38% yield respectively. The NMR yield determination suggested that enantiomeric catalysts showed similar yield. The product yield afforded by (*R,R*)-**3a** and (*S,S*)-**3a** enantiomer pair was slightly higher than the (*R,S*)-**3a** and (*S,R*)-**3a** enantiomer pair.

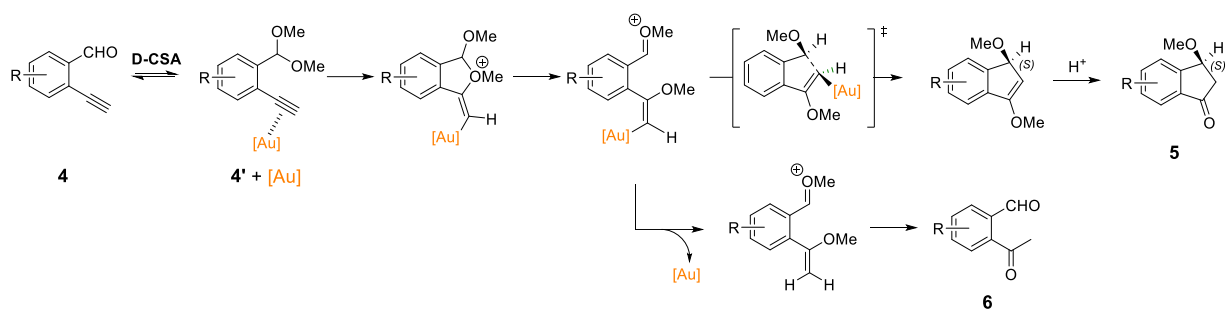

**Scheme S3.** Reaction mechanism of carboalkoxylation of *ortho*-alkynylbenzaldehydes.

The aldehyde group of **4** was first rapidly converted into dimethyl acetal group in the presence of D-CSA and MeOH, affording alkyne **4'**. The mechanism of carboalkoxylation reaction of alkynes has been previously studied in literatures.<sup>[2-4]</sup> According to the proposed mechanism, the alkyne group of **4'** was then activated by gold(III) catalyst followed by intramolecular nucleophilic addition resulting in the cyclic acetal intermediates then underwent Petasis-Ferrier rearrangement to generate oxonium ion [-CH=(OMe)+]. This oxonium ion could either undergo 5-exo-trig cyclization to afford the desired chiral product **5**, or protodeauration to generate the hydration product **6**.

**Table S3.** Comparison of product yields of carboalkoxylation of **4a** using methanol with different water content.<sup>a</sup>

| Entry | Solvent            | Air/N <sub>2</sub> | Yield (%) <sup>b</sup> |
|-------|--------------------|--------------------|------------------------|
| 1     | Methanol           | Air                | 47                     |
| 2     | Anhydrous methanol | N <sub>2</sub>     | 44                     |

<sup>a</sup> Reaction conditions: 5 mol% of (*R,R*)-**3a**, 2.5 mol% of D-CSA, 0.2 mmol of substrate **4a**, 2 mL of solvent. <sup>b</sup> Isolated yield.

Similar yields of product **5** were obtained using methanol with different water content. Moreover, the hydration product **6** was still observed in TLC even though anhydrous methanol was used as solvent for the reaction. This result indicated that the presence of water in the solvent did not significantly contribute to the hydration product formation. The formation of the hydration product **6** was possibly attributed to the competing reaction of the protodeauration (Scheme S3).

**Table S4.** <sup>1</sup>H NMR study of the carboalkoxylation of substrates **4a-4k**.<sup>a</sup>

| Entry | Substrate | Conversion of acetal <b>4'</b> (%) | <sup>1</sup> H NMR Yield (%) <sup>b</sup> |
|-------|-----------|------------------------------------|-------------------------------------------|
| 1     | <b>4a</b> | 100                                | 50                                        |
| 2     | <b>4b</b> | 100                                | 83                                        |
| 3     | <b>4c</b> | 95                                 | 42                                        |
| 4     | <b>4d</b> | 100                                | 73                                        |
| 5     | <b>4e</b> | 97                                 | 31                                        |
| 6     | <b>4f</b> | 94                                 | 77                                        |
| 7     | <b>4g</b> | 100                                | 60                                        |
| 8     | <b>4h</b> | 100                                | 70                                        |
| 9     | <b>4i</b> | 95                                 | 59                                        |
| 10    | <b>4j</b> | 86                                 | 37                                        |
| 11    | <b>4k</b> | 41                                 | n.d.                                      |

<sup>a</sup> Reaction conditions: 5 mol% of different catalysts, 2.5 mol% of D-CSA, 0.2 mmol of substrate **4**, 2 mL of MeOH. <sup>b</sup> Yields were determined by <sup>1</sup>H NMR spectroscopy with 1,3,5-trimethoxybenzene as an internal standard.

The acetal forms of the substrates **4a – 4i** without substituent or bearing an electron donating group were almost consumed after 16 h but gave moderate yields, which possibly revealed that the presence of competing reaction (i.e., the formation of hydration product **6**) limited the formation of product. The acetal forms of the substrates **4j** and **4k** bearing electron withdrawing group showed incomplete conversion, which was possibly due to the withdrawing properties of -Cl and -CF<sub>3</sub> lowering the rate of the intramolecular nucleophilic cyclization step as well as the 5-exo-trig cyclization step, affording **5j** with low yield while **5k** was not determined.

## X-Ray Crystal Structure of (*R,R*)-3a

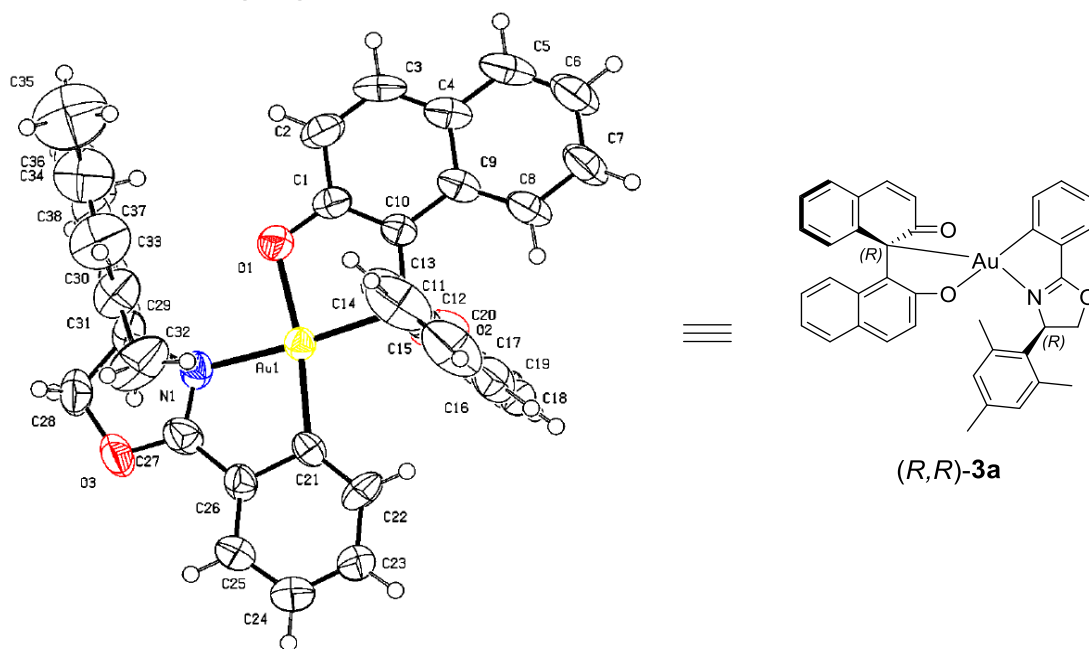

**Figure S7.** X-ray crystal structure of (*R,R*)-3a.

**Table S5.** Crystal data and structure refinement for (*R,R*)-3a.

|                                             |                                                               |
|---------------------------------------------|---------------------------------------------------------------|
| Empirical formula                           | C <sub>38</sub> H <sub>30</sub> AuNO <sub>3</sub>             |
| Formula weight                              | 745.60                                                        |
| Temperature/K                               | 216(2)                                                        |
| Crystal system                              | orthorhombic                                                  |
| Space group                                 | P212121                                                       |
| a/Å                                         | 10.4093(9)                                                    |
| b/Å                                         | 13.2093(12)                                                   |
| c/Å                                         | 23.861(2)                                                     |
| α/°                                         | 90                                                            |
| β/°                                         | 90                                                            |
| γ/°                                         | 90                                                            |
| Volume/Å <sup>3</sup>                       | 3280.9(5)                                                     |
| Z                                           | 4                                                             |
| ρ <sub>calc</sub> /cm <sup>3</sup>          | 1.510                                                         |
| μ/mm <sup>-1</sup>                          | 4.520                                                         |
| F(000)                                      | 1472.0                                                        |
| Crystal size/mm <sup>3</sup>                | 0.06 × 0.04 × 0.02                                            |
| Radiation                                   | MoKα (λ = 0.71073)                                            |
| 2θ range for data collection/°              | 4.27 to 55.944                                                |
| Index ranges                                | -13 ≤ h ≤ 13, -17 ≤ k ≤ 17, -31 ≤ l ≤ 31                      |
| Reflections collected                       | 54762                                                         |
| Independent reflections                     | 7895 [R <sub>int</sub> = 0.1107, R <sub>sigma</sub> = 0.0553] |
| Data/restraints/parameters                  | 7895/0/391                                                    |
| Goodness-of-fit on F <sup>2</sup>           | 1.143                                                         |
| Final R indexes [I >= 2σ (I)]               | R <sub>1</sub> = 0.0533, wR <sub>2</sub> = 0.1123             |
| Final R indexes [all data]                  | R <sub>1</sub> = 0.0660, wR <sub>2</sub> = 0.1177             |
| Largest diff. peak/hole / e Å <sup>-3</sup> | 1.86/-4.17                                                    |
| Flack parameter                             | 0.011(5)                                                      |



**Table S6.** Fractional Atomic Coordinates ( $\times 10^4$ ) and Equivalent Isotropic Displacement Parameters ( $\text{\AA}^2 \times 10^3$ ) for (*R,R*)-**3a**.  $U_{\text{eq}}$  is defined as 1/3 of the trace of the orthogonalised  $U_{ij}$  tensor.

| Atom | x         | y         | z         | $U_{\text{eq}}$ |
|------|-----------|-----------|-----------|-----------------|
| Au1  | 6833.2(5) | 4622.0(3) | 5296.9(2) | 38.84(12)       |
| C1   | 6196(13)  | 3996(11)  | 6381(5)   | 46(3)           |
| C2   | 6113(16)  | 3371(13)  | 6859(7)   | 66(4)           |
| C3   | 5352(19)  | 3660(14)  | 7295(6)   | 71(5)           |
| C4   | 4629(16)  | 4537(13)  | 7275(5)   | 61(4)           |
| C5   | 3810(20)  | 4812(16)  | 7718(7)   | 84(6)           |
| C6   | 3050(30)  | 5649(14)  | 7687(7)   | 91(7)           |
| C7   | 3110(20)  | 6278(12)  | 7220(6)   | 82(5)           |
| C8   | 3921(17)  | 6048(12)  | 6790(6)   | 64(4)           |
| C9   | 4710(14)  | 5189(10)  | 6798(5)   | 49(3)           |
| C10  | 5504(13)  | 4887(9)   | 6344(5)   | 41(3)           |
| C11  | 5661(11)  | 5546(8)   | 5816(5)   | 37(3)           |
| C12  | 6419(14)  | 6490(9)   | 5942(6)   | 48(3)           |
| C13  | 7521(18)  | 6465(14)  | 6229(7)   | 73(5)           |
| C14  | 8260(30)  | 7299(18)  | 6346(8)   | 105(8)          |
| C15  | 7830(30)  | 8218(18)  | 6165(10)  | 107(9)          |
| C16  | 6660(30)  | 8302(12)  | 5887(8)   | 84(6)           |
| C17  | 5960(19)  | 7416(11)  | 5760(6)   | 63(4)           |
| C18  | 4770(20)  | 7482(14)  | 5484(7)   | 74(5)           |
| C19  | 4020(16)  | 6680(15)  | 5348(8)   | 71(5)           |
| C20  | 4390(13)  | 5649(10)  | 5520(5)   | 46(3)           |
| C21  | 6902(13)  | 5411(10)  | 4560(4)   | 43(2)           |
| C22  | 6451(15)  | 6303(10)  | 4400(7)   | 58(4)           |
| C23  | 6628(18)  | 6702(12)  | 3865(6)   | 66(4)           |
| C24  | 7279(18)  | 6156(14)  | 3471(7)   | 78(5)           |
| C25  | 7810(15)  | 5250(14)  | 3616(6)   | 67(4)           |
| C26  | 7643(13)  | 4852(9)   | 4140(6)   | 48(3)           |
| C27  | 8204(19)  | 3932(10)  | 4337(6)   | 58(3)           |
| C28  | 9321(19)  | 2515(13)  | 4393(7)   | 71(5)           |
| C29  | 8677(15)  | 2704(11)  | 4960(7)   | 57(4)           |
| C30  | 9516(15)  | 2745(11)  | 5468(7)   | 59(4)           |
| C31  | 10418(16) | 3547(13)  | 5548(8)   | 76(5)           |
| C32  | 10570(20) | 4436(14)  | 5151(10)  | 108(8)          |
| C33  | 11200(20) | 3524(19)  | 6020(11)  | 103(8)          |
| C34  | 11110(20) | 2800(20)  | 6423(11)  | 109(8)          |
| C35  | 11930(30) | 2830(20)  | 6965(12)  | 161(13)         |
| C36  | 10270(19) | 2010(17)  | 6336(8)   | 82(5)           |
| C37  | 9546(17)  | 1982(13)  | 5878(7)   | 62(4)           |
| C38  | 8570(20)  | 1124(13)  | 5825(7)   | 84(6)           |
| N1   | 7957(10)  | 3647(8)   | 4845(4)   | 46(3)           |
| O1   | 6923(10)  | 3686(7)   | 5960(4)   | 50(2)           |
| O2   | 3756(10)  | 4890(9)   | 5428(4)   | 74(4)           |
| O3   | 8957(13)  | 3354(9)   | 4038(5)   | 80(4)           |

**Table S7.** Anisotropic Displacement Parameters ( $\text{\AA}^2 \times 10^3$ ) for (*R,R*)-**3a**.

| Atom | U <sub>11</sub> | U <sub>22</sub> | U <sub>33</sub> | U <sub>23</sub> | U <sub>13</sub> | U <sub>12</sub> |
|------|-----------------|-----------------|-----------------|-----------------|-----------------|-----------------|
| Au1  | 35.28(19)       | 37.42(19)       | 43.8(2)         | 0.6(2)          | 3.1(2)          | -0.7(2)         |
| C1   | 45(7)           | 51(8)           | 44(7)           | 10(6)           | -5(6)           | -3(6)           |
| C2   | 62(10)          | 71(11)          | 66(10)          | 28(8)           | -5(8)           | 6(8)            |
| C3   | 89(13)          | 80(12)          | 43(8)           | 29(8)           | 0(8)            | -17(10)         |
| C4   | 77(10)          | 64(9)           | 41(7)           | 7(7)            | 3(7)            | -17(10)         |
| C5   | 116(16)         | 95(15)          | 41(8)           | 11(9)           | 17(9)           | -21(13)         |
| C6   | 130(19)         | 82(13)          | 60(10)          | -5(8)           | 45(12)          | -1(14)          |
| C7   | 118(15)         | 65(10)          | 62(9)           | -12(8)          | 45(11)          | -4(12)          |
| C8   | 88(12)          | 60(9)           | 43(8)           | -5(7)           | 22(8)           | -13(9)          |
| C9   | 58(8)           | 52(9)           | 38(6)           | -5(6)           | 4(6)            | -19(7)          |
| C10  | 45(7)           | 42(7)           | 37(6)           | -2(5)           | 0(5)            | -6(5)           |
| C11  | 43(6)           | 26(6)           | 42(6)           | 2(5)            | 15(5)           | -1(5)           |
| C12  | 64(9)           | 32(6)           | 48(8)           | 1(6)            | 15(7)           | -11(6)          |
| C13  | 74(12)          | 74(11)          | 70(11)          | -21(9)          | 12(9)           | -37(9)          |
| C14  | 110(17)         | 112(17)         | 93(14)          | -30(13)         | 23(14)          | -74(16)         |
| C15  | 130(20)         | 79(14)          | 108(17)         | -34(12)         | 48(16)          | -60(16)         |
| C16  | 124(19)         | 41(8)           | 88(13)          | -4(8)           | 46(14)          | -1(11)          |
| C17  | 92(13)          | 42(8)           | 54(9)           | -4(6)           | 25(9)           | 3(8)            |
| C18  | 92(14)          | 66(11)          | 65(11)          | 20(8)           | 28(10)          | 31(10)          |
| C19  | 51(9)           | 102(13)         | 59(9)           | 14(11)          | -1(8)           | 34(9)           |
| C20  | 45(7)           | 55(8)           | 37(6)           | -1(5)           | 15(5)           | 10(6)           |
| C21  | 37(5)           | 47(6)           | 44(6)           | -5(5)           | 8(5)            | -6(7)           |
| C22  | 64(10)          | 34(7)           | 76(10)          | 19(7)           | -10(7)          | 0(6)            |
| C23  | 70(12)          | 63(9)           | 64(9)           | 19(7)           | 15(8)           | 15(9)           |
| C24  | 97(15)          | 75(11)          | 62(10)          | 26(9)           | 19(9)           | 15(10)          |
| C25  | 69(11)          | 78(11)          | 54(8)           | 14(8)           | 19(7)           | 9(9)            |
| C26  | 41(7)           | 42(8)           | 61(8)           | 4(6)            | 16(6)           | -2(5)           |
| C27  | 70(9)           | 47(7)           | 57(8)           | 1(6)            | 18(9)           | -7(9)           |
| C28  | 72(13)          | 57(10)          | 86(13)          | -4(9)           | 16(10)          | 23(10)          |
| C29  | 47(8)           | 43(8)           | 83(10)          | 3(7)            | 4(7)            | 8(6)            |
| C30  | 41(8)           | 50(8)           | 88(12)          | -6(7)           | 11(8)           | 9(7)            |
| C31  | 41(8)           | 72(11)          | 115(15)         | 18(10)          | -4(9)           | -15(8)          |
| C32  | 76(13)          | 71(12)          | 180(20)         | 59(14)          | -12(14)         | -32(10)         |
| C33  | 66(13)          | 111(18)         | 130(20)         | 10(15)          | -26(13)         | -39(12)         |
| C34  | 79(15)          | 130(20)         | 113(19)         | 2(17)           | -17(13)         | -28(15)         |
| C35  | 130(30)         | 200(30)         | 160(30)         | 0(20)           | -70(20)         | -30(30)         |
| C36  | 75(13)          | 100(15)         | 72(12)          | 4(11)           | 13(10)          | -4(11)          |
| C37  | 58(9)           | 64(10)          | 62(10)          | -10(8)          | 12(8)           | -4(8)           |
| C38  | 140(20)         | 59(9)           | 57(9)           | 0(8)            | 9(10)           | -7(11)          |
| N1   | 37(6)           | 41(5)           | 60(7)           | 1(4)            | 6(5)            | 1(4)            |
| O1   | 46(5)           | 53(5)           | 51(5)           | 5(4)            | 1(5)            | 3(5)            |
| O2   | 66(7)           | 95(8)           | 61(7)           | 7(5)            | -24(5)          | -52(6)          |
| O3   | 103(10)         | 58(7)           | 79(8)           | 2(6)            | 47(7)           | 25(6)           |

**Table S8.** Bond Lengths for (*R,R*)-**3a**.

| Atom | Atom | Length/Å  | Atom | Atom | Length/Å  |
|------|------|-----------|------|------|-----------|
| Au1  | C11  | 2.125(11) | C18  | C19  | 1.35(3)   |
| Au1  | C21  | 2.045(11) | C19  | C20  | 1.47(2)   |
| Au1  | N1   | 2.047(10) | C20  | O2   | 1.220(16) |
| Au1  | O1   | 2.009(8)  | C21  | C22  | 1.325(18) |
| C1   | C2   | 1.410(19) | C21  | C26  | 1.464(17) |
| C1   | C10  | 1.383(18) | C22  | C23  | 1.39(2)   |
| C1   | O1   | 1.324(16) | C23  | C24  | 1.37(2)   |
| C2   | C3   | 1.36(2)   | C24  | C25  | 1.36(2)   |
| C3   | C4   | 1.38(2)   | C25  | C26  | 1.368(19) |
| C4   | C5   | 1.41(2)   | C26  | C27  | 1.43(2)   |
| C4   | C9   | 1.431(19) | C27  | N1   | 1.296(16) |
| C5   | C6   | 1.36(3)   | C27  | O3   | 1.306(18) |
| C6   | C7   | 1.39(2)   | C28  | C29  | 1.53(2)   |
| C7   | C8   | 1.36(2)   | C28  | O3   | 1.45(2)   |
| C8   | C9   | 1.40(2)   | C29  | C30  | 1.49(2)   |
| C9   | C10  | 1.419(18) | C29  | N1   | 1.480(17) |
| C10  | C11  | 1.540(15) | C30  | C31  | 1.43(2)   |
| C11  | C12  | 1.505(17) | C30  | C37  | 1.40(2)   |
| C11  | C20  | 1.505(19) | C31  | C32  | 1.52(2)   |
| C12  | C13  | 1.34(2)   | C31  | C33  | 1.39(3)   |
| C12  | C17  | 1.38(2)   | C33  | C34  | 1.36(3)   |
| C13  | C14  | 1.37(2)   | C34  | C35  | 1.55(3)   |
| C14  | C15  | 1.36(4)   | C34  | C36  | 1.38(3)   |
| C15  | C16  | 1.39(3)   | C36  | C37  | 1.33(3)   |
| C16  | C17  | 1.41(3)   | C37  | C38  | 1.53(2)   |
| C17  | C18  | 1.41(3)   |      |      |           |

**Table S9.** Bond Angles for (*R,R*)-**3a**.

| Atom | Atom | Atom | Angle/°   | Atom | Atom | Atom | Angle/°   |
|------|------|------|-----------|------|------|------|-----------|
| C21  | Au1  | C11  | 103.2(5)  | C18  | C19  | C20  | 120.4(15) |
| C21  | Au1  | N1   | 81.2(5)   | C19  | C20  | C11  | 116.3(13) |
| N1   | Au1  | C11  | 175.5(4)  | O2   | C20  | C11  | 119.1(12) |
| O1   | Au1  | C11  | 85.5(4)   | O2   | C20  | C19  | 124.6(15) |
| O1   | Au1  | C21  | 171.3(4)  | C22  | C21  | Au1  | 133.5(10) |
| O1   | Au1  | N1   | 90.1(4)   | C22  | C21  | C26  | 116.0(12) |
| C10  | C1   | C2   | 121.2(14) | C26  | C21  | Au1  | 110.4(9)  |
| O1   | C1   | C2   | 117.9(13) | C21  | C22  | C23  | 123.6(15) |
| O1   | C1   | C10  | 120.8(11) | C24  | C23  | C22  | 119.8(15) |
| C3   | C2   | C1   | 119.3(15) | C25  | C24  | C23  | 119.4(15) |
| C2   | C3   | C4   | 121.7(14) | C24  | C25  | C26  | 121.2(15) |
| C3   | C4   | C5   | 121.5(15) | C25  | C26  | C21  | 119.9(13) |
| C3   | C4   | C9   | 120.0(14) | C25  | C26  | C27  | 125.1(13) |
| C5   | C4   | C9   | 118.6(17) | C27  | C26  | C21  | 114.9(12) |
| C6   | C5   | C4   | 121.6(16) | N1   | C27  | C26  | 118.2(14) |
| C5   | C6   | C7   | 120.1(17) | N1   | C27  | O3   | 117.5(14) |
| C8   | C7   | C6   | 119.8(19) | O3   | C27  | C26  | 124.3(13) |
| C7   | C8   | C9   | 122.4(15) | O3   | C28  | C29  | 106.2(12) |
| C8   | C9   | C4   | 117.6(13) | C30  | C29  | C28  | 117.9(13) |
| C8   | C9   | C10  | 124.0(12) | N1   | C29  | C28  | 101.2(12) |
| C10  | C9   | C4   | 118.2(14) | N1   | C29  | C30  | 114.6(13) |
| C1   | C10  | C9   | 119.6(12) | C31  | C30  | C29  | 121.3(15) |
| C1   | C10  | C11  | 118.6(11) | C37  | C30  | C29  | 123.4(15) |
| C9   | C10  | C11  | 121.8(11) | C37  | C30  | C31  | 115.1(16) |
| C10  | C11  | Au1  | 102.3(7)  | C30  | C31  | C32  | 123.8(17) |
| C12  | C11  | Au1  | 106.9(8)  | C33  | C31  | C30  | 118.5(17) |
| C12  | C11  | C10  | 111.2(10) | C33  | C31  | C32  | 117.7(17) |
| C20  | C11  | Au1  | 106.4(8)  | C34  | C33  | C31  | 123.3(19) |
| C20  | C11  | C10  | 109.9(10) | C33  | C34  | C35  | 122(2)    |
| C20  | C11  | C12  | 118.7(11) | C33  | C34  | C36  | 118(2)    |
| C13  | C12  | C11  | 122.1(14) | C36  | C34  | C35  | 119(2)    |
| C13  | C12  | C17  | 118.6(15) | C37  | C36  | C34  | 120(2)    |
| C17  | C12  | C11  | 119.3(14) | C30  | C37  | C38  | 117.4(16) |
| C12  | C13  | C14  | 124(2)    | C36  | C37  | C30  | 124.4(17) |
| C15  | C14  | C13  | 118(3)    | C36  | C37  | C38  | 117.8(17) |
| C14  | C15  | C16  | 120.4(19) | C27  | N1   | Au1  | 115.1(10) |
| C15  | C16  | C17  | 119.4(18) | C27  | N1   | C29  | 108.5(12) |
| C12  | C17  | C16  | 119.1(19) | C29  | N1   | Au1  | 136.2(9)  |
| C12  | C17  | C18  | 120.4(16) | C1   | O1   | Au1  | 112.4(8)  |
| C18  | C17  | C16  | 120.4(18) | C27  | O3   | C28  | 106.5(12) |
| C19  | C18  | C17  | 124.8(16) |      |      |      |           |

**Table S10.** Hydrogen Atom Coordinates ( $\text{\AA}\times 10^4$ ) and Isotropic Displacement Parameters ( $\text{\AA}^2\times 10^3$ ) for (*R,R*)-**3a**.

| Atom | x        | y       | z       | U(eq) |
|------|----------|---------|---------|-------|
| H2   | 6577.05  | 2760.94 | 6875.74 | 79    |
| H3   | 5318.79  | 3252.92 | 7618.04 | 85    |
| H5   | 3785.17  | 4409.47 | 8042.42 | 101   |
| H6   | 2480.93  | 5802.04 | 7982.19 | 109   |
| H7   | 2587.68  | 6859.2  | 7200.11 | 98    |
| H8   | 3953.53  | 6480.94 | 6478.23 | 76    |
| H13  | 7809.1   | 5833.36 | 6360.45 | 87    |
| H14  | 9034.9   | 7237.99 | 6544.91 | 126   |
| H15  | 8334.16  | 8799.27 | 6228.98 | 129   |
| H16  | 6342.89  | 8941.22 | 5785.51 | 101   |
| H18  | 4470.43  | 8130.61 | 5386.32 | 89    |
| H19  | 3260.45  | 6781.64 | 5143.02 | 85    |
| H22  | 5986.48  | 6688.79 | 4661.78 | 70    |
| H23  | 6299.16  | 7345.03 | 3775.59 | 79    |
| H24  | 7361.27  | 6402.21 | 3103.42 | 93    |
| H25  | 8300.09  | 4891.74 | 3351.31 | 80    |
| H28A | 10256.81 | 2486.03 | 4435.19 | 86    |
| H28B | 9024.52  | 1873.43 | 4231.76 | 86    |
| H29  | 8040.58  | 2157.62 | 5020.03 | 69    |
| H32A | 10136.43 | 5023.93 | 5306.81 | 162   |
| H32B | 10182.67 | 4268.08 | 4791.84 | 162   |
| H32C | 11470.08 | 4584.54 | 5099.37 | 162   |
| H33  | 11818.9  | 4034.74 | 6062.92 | 124   |
| H35A | 11662.02 | 2286.08 | 7213.36 | 242   |
| H35B | 11821.06 | 3473.24 | 7150.45 | 242   |
| H35C | 12830.54 | 2734.83 | 6868.23 | 242   |
| H36  | 10209.56 | 1487.52 | 6602.56 | 99    |
| H38A | 8867.27  | 541.4   | 6035.34 | 127   |
| H38B | 8474.75  | 940.12  | 5433.15 | 127   |
| H38C | 7747.64  | 1345.27 | 5971.45 | 127   |

## Characterization Data of Compounds

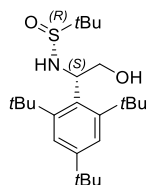

**S2**

**<sup>1</sup>H NMR (600 MHz, CDCl<sub>3</sub>)** δ 7.56 (s, 1H), 7.46 (s, 1H), 5.66 (dt, *J* = 7.2, 3.4 Hz, 1H), 4.49 (td, *J* = 7.6, 3.8 Hz, 1H), 3.92 – 3.84 (m, 1H), 3.60 (d, *J* = 3.3 Hz, 1H), 1.60 (s, 9H), 1.53 (s, 9H), 1.31 (s, 9H), 1.28 (s, 9H).

**<sup>13</sup>C NMR (150 MHz, CDCl<sub>3</sub>)** δ 150.75, 149.92, 148.86, 133.59, 126.28, 123.01, 67.62, 58.80, 56.33, 38.69, 37.92, 35.26, 34.99, 33.69, 31.35, 22.92.

**HRMS (ESI):** [M + H]<sup>+</sup> Calcd. for [C<sub>24</sub>H<sub>44</sub>NO<sub>2</sub>S]<sup>+</sup> 410.3087, found 410.3094.

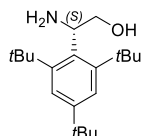

**S3**

**<sup>1</sup>H NMR (600 MHz, CDCl<sub>3</sub>)** δ 7.48 (s, 2H), 4.91 (dd, *J* = 10.7, 5.7 Hz, 1H), 4.08 (t, *J* = 10.6 Hz, 1H), 3.52 (dd, *J* = 10.6, 5.7 Hz, 1H), 1.52 (s, 18H), 1.31 (d, *J* = 1.3 Hz, 9H), 1.19 (d, *J* = 1.3 Hz, 1H).

**<sup>13</sup>C NMR (150 MHz, CDCl<sub>3</sub>)** δ 149.60, 147.99, 137.12, 65.23, 52.70, 35.00, 31.45, 21.65.

**HRMS (ESI):** [M + Na]<sup>+</sup> Calcd. for [C<sub>20</sub>H<sub>35</sub>NNaO]<sup>+</sup> 328.2611, found 328.2620.

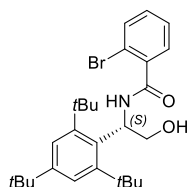

**S4**

**<sup>1</sup>H NMR (600 MHz, CDCl<sub>3</sub>)** δ 7.63 – 7.55 (m, 2H), 7.48 (s, 1H), 7.42 (dd, *J* = 7.6, 1.7 Hz, 1H), 7.34 (t, *J* = 7.5 Hz, 1H), 7.29 – 7.26 (m, 1H), 6.46 (s, 1H), 6.20 (td, *J* = 4.9, 2.2 Hz, 1H), 5.14 (d, *J* = 9.5 Hz, 1H), 4.71 (dd, *J* = 11.6, 7.6 Hz, 1H), 4.00 – 3.90 (m, 1H), 1.60 (s, 9H), 1.53 (s, 9H), 1.31 (s, 9H).

**<sup>13</sup>C NMR (150 MHz, CDCl<sub>3</sub>)** δ 169.21, 149.55, 137.49, 133.73, 131.96, 131.59, 128.83, 127.68, 119.44, 68.86, 58.04, 35.26, 35.10, 33.40, 31.37.

**HRMS (ESI):** [M + Na]<sup>+</sup> Calcd. for [C<sub>27</sub>H<sub>38</sub>BrNNaO<sub>2</sub>]<sup>+</sup> 510.1978, found 510.1985.

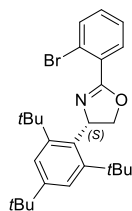

**S5**

**<sup>1</sup>H NMR (600 MHz, CDCl<sub>3</sub>)** δ 7.86 (d, *J* = 7.7 Hz, 1H), 7.67 (d, *J* = 8.1 Hz, 1H), 7.48 (s, 2H), 7.38 (td, *J* = 7.6, 1.3 Hz, 1H), 7.30 (td, *J* = 7.7, 1.7 Hz, 1H), 6.50 (t, *J* = 12.7 Hz, 1H), 4.64 (dd, *J* = 12.3, 8.3 Hz, 1H), 4.22 (dd, *J* = 13.2, 8.3 Hz, 1H), 1.52 (s, 18H), 1.33 (s, 9H).

**<sup>13</sup>C NMR (150 MHz, CDCl<sub>3</sub>)** δ 161.96, 150.98, 148.35, 134.15, 133.86, 131.68, 131.65, 130.35, 127.29, 123.68, 121.94, 74.89, 67.64, 38.19, 35.02, 34.00, 31.48.

**HRMS (ESI):** [M + H]<sup>+</sup> Calcd. for [C<sub>27</sub>H<sub>37</sub>BrNO]<sup>+</sup> 470.2053, found 470.2059.

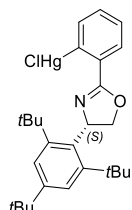

**S6**

**<sup>1</sup>H NMR (600 MHz, CDCl<sub>3</sub>)** δ 8.01 (d, *J* = 7.7 Hz, 1H), 7.57 (td, *J* = 7.4, 1.3 Hz, 1H), 7.48 – 7.39 (m, 4H), 6.45 (t, *J* = 12.5 Hz, 1H), 4.65 (dd, *J* = 12.2, 8.3 Hz, 1H), 4.22 (dd, *J* = 12.9, 8.3 Hz, 1H), 1.53 – 1.36 (m, 18H), 1.32 (s, 9H).

**<sup>13</sup>C NMR (150 MHz, CDCl<sub>3</sub>)** δ 167.11, 150.97, 148.46, 137.35, 133.34, 132.64, 132.50, 128.85, 128.76, 66.80, 53.57, 35.03, 33.97, 33.20, 31.47, 30.65, 28.10, 13.67.

**HRMS (ESI):** [M + Na]<sup>+</sup> Calcd. for [C<sub>27</sub>H<sub>37</sub>ClHgNO]<sup>+</sup> 628.2264, found 628.2266.

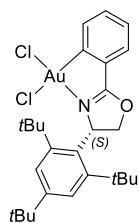

(S)-1c

**<sup>1</sup>H NMR (600 MHz, CDCl<sub>3</sub>)** δ 8.06 (d, *J* = 7.9 Hz, 1H), 7.58 (d, *J* = 2.0 Hz, 1H), 7.53 – 7.47 (m, 2H), 7.44 – 7.39 (m, 2H), 6.55 (t, *J* = 12.0 Hz, 1H), 5.45 – 5.38 (m, 1H), 5.17 – 5.10 (m, 1H), 1.55 (s, 9H), 1.47 (s, 9H), 1.31 (s, 9H).

**<sup>13</sup>C NMR (150 MHz, CDCl<sub>3</sub>)** δ 180.96, 151.25, 150.61, 150.26, 148.90, 135.29, 131.04, 128.65, 128.56, 128.09, 127.90, 127.14, 123.29, 65.12, 39.31, 37.60, 35.24, 35.01, 34.56, 31.31.

**HRMS (ESI):** [M - Cl]<sup>+</sup> Calcd. for [C<sub>27</sub>H<sub>36</sub>AuClNO]<sup>+</sup> 622.2145, found 622.2153.

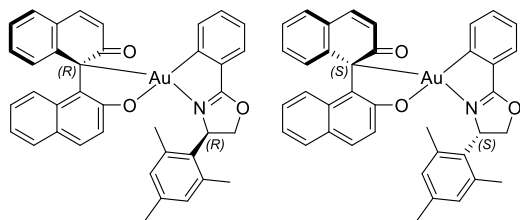

(R,R)-3a

(S,S)-3a

**<sup>1</sup>H NMR (600 MHz, CDCl<sub>3</sub>)** δ 7.85 (d, *J* = 10.0 Hz, 1H), 7.60 (d, *J* = 7.6 Hz, 1H), 7.55 (d, *J* = 8.9 Hz, 1H), 7.43 – 7.40 (m, 1H), 7.31 (d, *J* = 7.9 Hz, 1H), 7.25 – 7.20 (m, 2H), 7.18 (t, *J* = 7.5 Hz, 1H), 7.16 – 7.14 (m, 1H), 7.06 (t, *J* = 7.6 Hz, 1H), 7.04 – 7.01 (m, 1H), 6.98 – 6.91 (m, 2H), 6.90 (d, *J* = 8.9 Hz, 1H), 6.85 (s, 1H), 6.61 (d, *J* = 9.0 Hz, 1H), 6.52 (d, *J* = 10.0 Hz, 1H), 6.10 (dd, *J* = 11.9, 8.0 Hz, 1H), 5.18 (dd, *J* = 11.8, 8.6 Hz, 1H), 4.81 (t, *J* = 8.3 Hz, 1H), 2.78 (s, 3H), 2.31 (s, 3H), 2.09 (s, 3H).

**<sup>13</sup>C NMR (100 MHz, CDCl<sub>3</sub>)** δ 200.84, 179.13, 170.85, 146.75, 144.84, 140.42, 138.42, 133.52, 132.75, 130.72, 130.66, 130.29, 130.11, 129.56, 129.52, 128.89, 128.83, 128.58, 128.51, 128.10, 127.61, 126.76, 126.49, 125.92, 124.94, 121.65, 120.60, 120.54, 77.53, 70.10, 61.77, 20.98.

**HRMS (ESI):** [M + H]<sup>+</sup> Calcd. for [C<sub>38</sub>H<sub>31</sub>AuNO<sub>3</sub>]<sup>+</sup> 746.1964, found 746.1967.

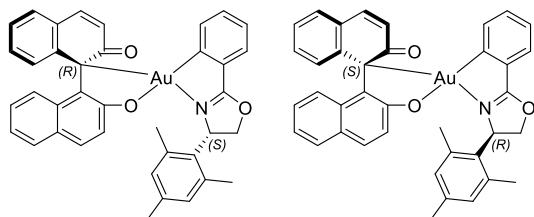

(R,S)-3a

(S,R)-3a

**<sup>1</sup>H NMR (400 MHz, CDCl<sub>3</sub>)** δ 7.89 (d, *J* = 9.8 Hz, 1H), 7.62 – 7.56 (m, 1H), 7.53 (d, *J* = 8.4 Hz, 1H), 7.48 – 7.42 (m, 2H), 7.40 – 7.35 (m, 2H), 7.25 – 7.17 (m, 2H), 7.12 (td, *J* = 7.5, 1.4 Hz, 1H), 7.04 (td, *J* = 7.6, 1.5 Hz, 1H), 6.99 – 6.91 (m, 3H), 6.85 – 6.78 (m, 2H), 6.68 – 6.57 (m, 2H), 6.10 (dd, *J* = 11.6, 7.8 Hz, 1H), 5.17 (dd, *J* = 11.4, 8.9 Hz, 1H), 4.83 (dd, *J* = 8.9, 8.0 Hz, 1H), 2.75 (s, 3H), 2.28 (s, 3H), 2.17 (s, 3H).

**<sup>13</sup>C NMR (150 MHz, CDCl<sub>3</sub>)** δ 200.84, 179.18, 170.94, 147.38, 145.11, 141.57, 138.64, 134.10, 132.76, 132.19, 130.53, 130.47, 130.38, 130.35, 129.73, 129.22, 129.15, 128.97, 128.86, 128.61, 128.24, 127.74, 126.77, 126.48, 126.04, 125.10, 121.67, 120.72, 120.62, 77.59, 70.12, 61.96, 21.01.

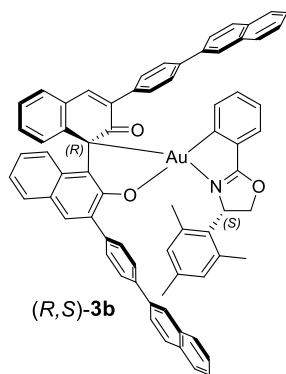

(R,S)-3b

**<sup>1</sup>H NMR (600 MHz, CDCl<sub>3</sub>)** δ 8.22 – 8.19 (m, 1H), 8.09 (s, 1H), 8.06 – 7.99 (m, 3H), 7.95 – 7.89 (m, 4H), 7.86 (dd, *J* = 8.8, 1.1 Hz, 1H), 7.78 – 7.72 (m, 4H), 7.72 – 7.68 (m, 4H), 7.68 – 7.64 (m, 1H), 7.61 (s, 1H), 7.59 – 7.52 (m, 4H), 7.52 – 7.46 (m, 4H), 7.40 (dd, *J* = 7.4, 1.7 Hz, 1H), 7.35 (td, *J* = 7.7, 1.7 Hz, 1H), 7.21 (dtd, *J* = 18.7, 7.4, 1.1 Hz, 2H), 7.15 – 7.09 (m, 2H), 7.03 – 6.99 (m, 2H), 6.80 (s, 1H), 6.65 (s, 1H), 5.93 (dd, *J* = 11.0, 8.7 Hz, 1H), 5.17 (dd, *J* = 11.0, 8.6 Hz, 1H), 4.55 (t, *J* = 8.6 Hz, 1H), 2.41 (s, 3H), 2.22 (s, 3H), 2.13 (s, 3H).

**<sup>13</sup>C NMR (150 MHz, CDCl<sub>3</sub>)** δ 199.26, 179.42, 168.09, 146.96, 143.17, 141.64, 140.95, 139.33, 138.98, 138.81, 138.54, 138.32, 137.54, 135.80, 134.10, 134.02, 133.79, 133.58, 132.78, 132.73, 132.46, 131.33, 131.08, 130.68, 130.55, 130.29, 130.07, 129.63, 129.52,

129.49, 129.27, 129.08, 128.69, 128.58, 128.54, 128.38, 127.87, 127.78, 127.28, 127.10, 126.92, 126.87, 126.85, 126.48, 126.43, 126.16, 126.10, 125.98, 125.89, 125.65, 125.62, 125.43, 121.20, 120.51, 78.25, 70.08, 63.55, 20.94.

**HRMS (ESI):**  $[M + H]^+$  Calcd. for  $[C_{70}H_{51}AuNO_3]^+$  1150.3529, found 1150.3527.

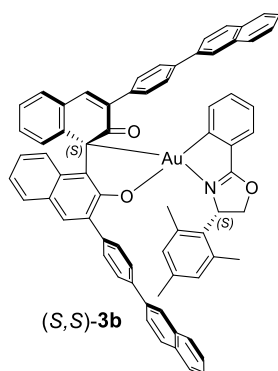

**$^1H$  NMR (600 MHz,  $CDCl_3$ )**  $\delta$  8.27 – 8.24 (m, 1H), 8.05 – 7.99 (m, 4H), 7.98 – 7.93 (m, 2H), 7.88 (dd,  $J = 8.9, 5.8$  Hz, 2H), 7.86 – 7.84 (m, 1H), 7.72 (dd,  $J = 8.5, 1.8$  Hz, 1H), 7.70 – 7.67 (m, 2H), 7.67 – 7.64 (m, 4H), 7.64 – 7.61 (m, 2H), 7.57 (ddd,  $J = 8.2, 4.5, 1.1$  Hz, 2H), 7.55 – 7.52 (m, 3H), 7.51 – 7.45 (m, 3H), 7.40 (dd,  $J = 7.4, 1.7$  Hz, 1H), 7.34 – 7.26 (m, 3H), 7.22 (dtd,  $J = 17.7, 7.4, 1.2$  Hz, 2H), 7.03 – 6.98 (m, 2H), 6.97 – 6.92 (m, 1H), 6.79 (s, 1H), 6.49 (s, 1H), 5.82 (dd,  $J = 11.4, 8.3$  Hz, 1H), 5.09 (dd,  $J = 11.4, 8.8$  Hz, 1H), 4.52 (d,  $J = 8.5$  Hz, 1H), 2.19 (s, 3H), 2.16 (d,  $J = 16.5$  Hz, 3H), 1.79 (s, 3H).

**$^{13}C$  NMR (150 MHz,  $CDCl_3$ )**  $\delta$  198.92, 179.54, 168.46, 146.53, 142.79, 140.71, 140.67, 139.72, 138.80, 138.52, 138.30, 138.13, 137.35, 135.59, 134.06, 133.92, 133.77, 133.53, 132.76, 132.74, 132.48, 131.45, 130.99, 130.63, 130.32, 129.96, 129.87, 129.57, 129.40, 129.03, 128.71, 128.53, 128.49, 128.37, 128.34, 127.87, 127.76, 127.72, 127.07, 127.04, 126.99, 126.87, 126.68, 126.47, 126.40, 126.16, 126.05, 125.96, 125.80, 125.63, 125.54, 125.30, 121.14, 120.49, 78.10, 70.48, 62.74, 31.73, 22.80, 20.92, 14.28.

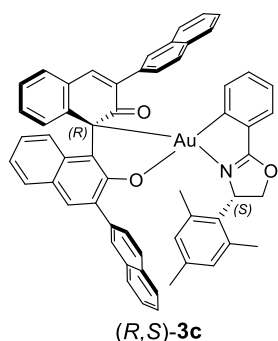

**$^1H$  NMR (600 MHz,  $CDCl_3$ )**  $\delta$  8.13 (s, 1H), 8.09 (s, 1H), 7.98 – 7.94 (m, 1H), 7.94 – 7.90 (m, 1H), 7.89 (s, 1H), 7.85 – 7.79 (m, 3H), 7.75 (dd,  $J = 8.3, 2.0$  Hz, 2H), 7.68 – 7.65 (m, 1H), 7.64 (dd,  $J = 8.5, 1.7$  Hz, 1H), 7.61 (dd,  $J = 7.8, 1.2$  Hz, 1H), 7.60 – 7.52 (m, 5H), 7.46 (dt,  $J = 6.2, 3.4$  Hz, 2H), 7.38 – 7.33 (m, 2H), 7.21 (tdd,  $J = 7.6, 4.8, 1.1$  Hz, 2H), 7.18 – 7.11 (m, 2H), 7.04 – 6.99 (m, 2H), 6.66 (s, 1H), 5.89 (s, 1H), 5.80 (dd,  $J = 11.1, 8.9$  Hz, 1H), 5.06 (dd,  $J = 11.2, 8.7$  Hz, 1H), 4.47 (t,  $J = 8.8$  Hz, 1H), 2.26 (s, 3H), 2.05 (s, 3H), 1.71 (s, 3H).

**$^{13}C$  NMR (150 MHz,  $CDCl_3$ )**  $\delta$  199.41, 179.28, 168.35, 147.01, 143.51, 141.59, 139.13, 138.36, 137.22, 134.37, 134.19, 133.99, 133.88, 133.39, 133.19, 132.55, 131.42, 130.63, 130.50, 130.47, 130.24, 129.47, 129.41, 129.26, 129.10, 128.66, 128.52, 128.47, 128.42, 128.18, 127.76, 127.65, 127.54, 127.52, 127.39, 127.09, 126.98, 126.89, 126.87, 126.83, 126.23, 126.14, 126.09, 125.44, 121.12, 120.48, 77.91, 70.13, 63.06, 20.98, 20.79.

**HRMS (ESI):**  $[M + H]^+$  Calcd. for  $[C_{58}H_{43}AuNO_3]^+$  998.2903, found 998.2902.

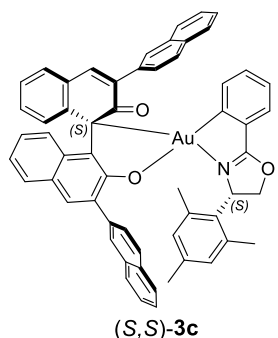

**$^1H$  NMR (400 MHz,  $CDCl_3$ )**  $\delta$  8.06 (s, 1H), 7.98 – 7.93 (m, 3H), 7.89 – 7.85 (m, 1H), 7.81 – 7.76 (m, 2H), 7.74 (d,  $J = 8.5$  Hz, 1H), 7.70 – 7.61 (m, 4H), 7.60 – 7.51 (m, 4H), 7.47 (dt,  $J = 8.4, 1.5$  Hz, 2H), 7.45 – 7.40 (m, 2H), 7.38 (dd,  $J = 7.3, 1.7$  Hz, 1H), 7.29 (tt,  $J = 7.4, 1.6$  Hz, 2H), 7.24 – 7.18 (m, 2H), 7.04 – 6.98 (m, 2H), 6.98 – 6.94 (m, 1H), 6.74 (s, 1H), 6.07 (s, 1H), 5.71 (dd,  $J = 11.4, 8.3$  Hz, 1H), 5.01 (dd,  $J = 11.4, 8.8$  Hz, 1H), 4.47 (t,  $J = 8.5$  Hz, 1H), 2.22 (s, 3H), 2.09 (s, 3H), 1.35 (s, 3H).



**<sup>13</sup>C NMR (150 MHz, CDCl<sub>3</sub>)** δ 198.98, 179.44, 168.60, 146.58, 143.21, 140.68, 138.86, 138.65, 137.32, 134.68, 134.04, 133.88, 133.47, 133.32, 133.09, 132.58, 132.52, 131.49, 131.02, 130.67, 130.29, 129.95, 129.86, 129.69, 129.33, 129.01, 128.81, 128.66, 128.55, 128.44, 128.38, 128.13, 127.84, 127.64, 127.62, 127.59, 127.54, 127.41, 127.36, 127.19, 127.06, 127.01, 126.48, 126.15, 125.99, 125.49, 125.46, 121.11, 120.55, 77.91, 70.67, 62.49, 29.84, 20.96, 20.08.

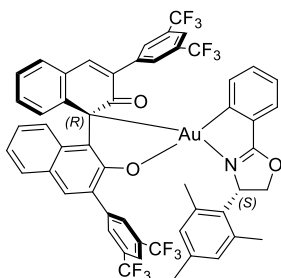

(*R,S*)-3d

**<sup>1</sup>H NMR (400 MHz, CDCl<sub>3</sub>)** δ 8.07 (s, 1H), 8.03 – 7.98 (m, 2H), 7.94 – 7.89 (m, 3H), 7.80 (s, 1H), 7.67 – 7.60 (m, 2H), 7.57 (dd, *J* = 7.7, 1.5 Hz, 1H), 7.45 – 7.40 (m, 2H), 7.34 (dd, *J* = 7.6, 1.5 Hz, 1H), 7.33 – 7.26 (m, 3H), 7.26 – 7.22 (m, 1H), 7.04 – 6.97 (m, 2H), 6.87 – 6.79 (m, 1H), 6.66 (s, 1H), 6.25 (s, 1H), 5.82 (dd, *J* = 11.1, 8.4 Hz, 1H), 5.14 (dd, *J* = 11.1, 8.9 Hz, 1H), 4.60 (t, *J* = 8.6 Hz, 1H), 2.29 – 2.00 (s, 6H), 1.78 (s, 3H).

**<sup>13</sup>C NMR (150 MHz, CDCl<sub>3</sub>)** δ 198.04, 179.25, 167.66, 146.64, 144.09, 142.94, 140.10, 138.41, 138.05, 135.92, 135.83, 133.79, 132.91, 131.84, 131.55, 131.41, 131.33, 131.23, 131.01, 130.68, 130.23, 129.89, 129.67, 129.58, 129.51, 129.27, 129.12, 129.04, 128.83, 128.64, 128.21, 127.39, 127.28, 127.02, 126.58, 124.87, 124.36, 123.06, 122.55, 121.64, 120.17, 77.96, 70.14, 62.28, 20.55.

**HRMS (ESI):** [*M* + *H*]<sup>+</sup> Calcd. for [C<sub>54</sub>H<sub>35</sub>AuF<sub>12</sub>NO<sub>3</sub>]<sup>+</sup> 1170.2085, found 1170.2084.

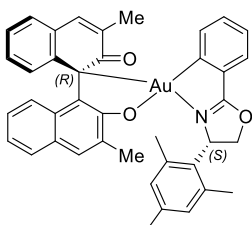

(*R,S*)-3e

**<sup>1</sup>H NMR (400 MHz, CDCl<sub>3</sub>)** δ 7.72 (d, *J* = 1.5 Hz, 1H), 7.50 (td, *J* = 7.5, 1.5 Hz, 2H), 7.39 (dd, *J* = 7.3, 1.8 Hz, 1H), 7.36 (dd, *J* = 7.6, 1.4 Hz, 2H), 7.32 (t, *J* = 1.0 Hz, 1H), 7.24 (dd, *J* = 7.6, 1.9 Hz, 1H), 7.19 (td, *J* = 7.4, 1.2 Hz, 1H), 7.09 (td, *J* = 7.4, 1.3 Hz, 1H), 6.98 (td, *J* = 7.5, 1.4 Hz, 1H), 6.95 – 6.84 (m, 4H), 6.73 – 6.67 (m, 1H), 6.09 (dd, *J* = 11.2, 9.5 Hz, 1H), 5.20 (dd, *J* = 11.2, 8.8 Hz, 1H), 4.70 (t, *J* = 9.2 Hz, 1H), 2.58 (s, 3H), 2.33 (s, 3H), 2.29 (s, 3H), 2.10 (d, *J* = 1.3 Hz, 3H), 1.95 (d, *J* = 1.0 Hz, 3H).

**<sup>13</sup>C NMR (150 MHz, CDCl<sub>3</sub>)** δ 200.80, 179.37, 169.79, 146.83, 142.07, 141.65, 138.26, 136.84, 136.73, 134.20, 132.31, 131.70, 130.78, 130.67, 130.52, 130.48, 129.66, 129.42, 129.16, 129.14, 127.92, 127.68, 127.36, 126.61, 126.41, 124.84, 124.68, 120.46, 120.23, 77.42, 69.44, 62.81, 29.84, 20.96, 16.65, 16.36.

**HRMS (ESI):** [*M* + *H*]<sup>+</sup> Calcd. for [C<sub>40</sub>H<sub>35</sub>AuNO<sub>3</sub>]<sup>+</sup> 774.2277, found 774.2276.

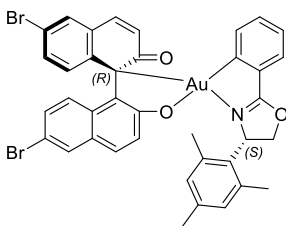

(*R,S*)-3f

**<sup>1</sup>H NMR (600 MHz, CDCl<sub>3</sub>)** δ 7.81 (d, *J* = 9.9 Hz, 1H), 7.73 (d, *J* = 2.3 Hz, 1H), 7.59 (d, *J* = 2.1 Hz, 1H), 7.47 – 7.37 (m, 3H), 7.29 – 7.22 (m, 2H), 7.22 – 7.12 (m, 2H), 7.03 (dd, *J* = 9.0, 2.1 Hz, 1H), 6.97 (s, 1H), 6.84 (s, 1H), 6.80 (d, *J* = 8.9 Hz, 1H), 6.66 (d, *J* = 9.9 Hz, 1H), 6.44 (d, *J* = 9.0 Hz, 1H), 6.08 (dd, *J* = 11.5, 8.0 Hz, 1H), 5.19 (dd, *J* = 11.5, 9.0 Hz, 1H), 4.83 (t, *J* = 8.5 Hz, 1H), 2.73 (s, 3H), 2.28 (s, 3H), 2.18 (s, 3H).

**<sup>13</sup>C NMR (150 MHz, CDCl<sub>3</sub>)** δ 200.01, 179.25, 171.43, 146.04, 143.58, 140.96, 138.75, 134.39, 133.25, 132.21, 131.91, 131.24, 131.16, 130.25, 130.22, 130.19, 130.08, 129.73, 129.23, 129.07, 128.04, 127.09, 124.76, 122.89, 122.10, 120.06, 114.20, 77.64, 67.97, 61.50, 20.54.

**HRMS (ESI):** [*M* + *H*]<sup>+</sup> Calcd. for [C<sub>38</sub>H<sub>29</sub>AuBr<sub>2</sub>NO<sub>3</sub>]<sup>+</sup> 902.0174, found 902.0171.

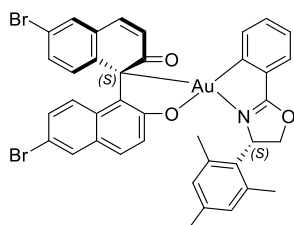

(*S,S*)-**3f**

**<sup>1</sup>H NMR (600 MHz, CDCl<sub>3</sub>)** δ 7.80 – 7.73 (m, 2H), 7.65 (d, *J* = 2.0 Hz, 1H), 7.46 (d, *J* = 8.9 Hz, 1H), 7.43 (dd, *J* = 7.0, 2.1 Hz, 1H), 7.28 – 7.23 (m, 2H), 7.18 – 7.08 (m, 3H), 7.05 – 7.00 (m, 2H), 6.89 (d, *J* = 8.9 Hz, 1H), 6.85 (d, *J* = 10.6 Hz, 1H), 6.55 (d, *J* = 9.9 Hz, 1H), 6.42 (d, *J* = 9.0 Hz, 1H), 6.08 (dd, *J* = 11.6, 8.0 Hz, 1H), 5.19 (dd, *J* = 11.6, 8.9 Hz, 1H), 4.81 (t, *J* = 8.5 Hz, 1H), 2.75 (s, 3H), 2.31 (s, 3H), 2.09 (s, 3H).

**<sup>13</sup>C NMR (150 MHz, CDCl<sub>3</sub>)** δ 200.13, 179.34, 171.45, 145.52, 143.43, 139.81, 138.67, 133.88, 133.34, 132.17, 131.79, 131.27, 131.09, 130.64, 130.49, 130.24, 130.21, 130.00, 129.70, 129.62, 129.49, 129.46, 129.25, 128.04, 127.20, 124.74, 122.98, 122.15, 120.25, 114.24, 77.72, 69.14, 61.86, 21.10.

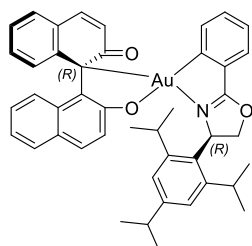

(*R,R*)-**3g**

**<sup>1</sup>H NMR (600 MHz, CDCl<sub>3</sub>)** δ 7.84 (d, *J* = 10.0 Hz, 1H), 7.60 – 7.55 (m, 1H), 7.50 (d, *J* = 8.6 Hz, 1H), 7.44 (dd, *J* = 7.7, 1.5 Hz, 1H), 7.41 – 7.38 (m, 1H), 7.24 (dd, *J* = 7.9, 1.2 Hz, 1H), 7.23 – 7.20 (m, 2H), 7.20 – 7.18 (m, 1H), 7.18 – 7.16 (m, 1H), 7.11 (td, *J* = 7.4, 1.2 Hz, 1H), 7.06 (d, *J* = 2.0 Hz, 1H), 6.99 – 6.95 (m, 1H), 6.95 – 6.89 (m, 2H), 6.76 (d, *J* = 9.0 Hz, 1H), 6.69 – 6.64 (m, 1H), 6.54 (d, *J* = 9.8 Hz, 1H), 6.22 – 6.15 (m, 1H), 5.18 (dd, *J* = 11.7, 8.7 Hz, 1H), 4.68 (dd, *J* = 9.9, 8.6 Hz, 1H), 3.71 (p, *J* = 6.8 Hz, 1H), 2.93 (p, *J* = 6.9 Hz, 1H), 2.70 (p, *J* = 6.7 Hz, 1H), 2.13 (s, 1H), 2.03 (s, 2H), 1.63 (d, *J* = 6.7 Hz, 3H), 1.30 (t, *J* = 7.0 Hz, 6H), 1.18 (d, *J* = 6.9 Hz, 3H), 1.03 (d, *J* = 6.7 Hz, 3H).

**<sup>13</sup>C NMR (100 MHz, CDCl<sub>3</sub>)** δ 201.00, 179.11, 171.11, 149.35, 148.70, 148.29, 147.14, 145.02, 141.10, 133.70, 132.81, 130.65, 130.22, 130.11, 129.87, 129.63, 129.02, 128.85, 128.72, 128.19, 127.94, 127.64, 126.73, 126.60, 125.99, 125.04, 123.31, 121.88, 121.25, 120.59, 79.16, 70.07, 61.32, 34.30, 29.93, 29.84, 28.69, 26.24, 25.85, 24.18, 23.97, 23.89, 23.78.

**HRMS (ESI):** [M + H]<sup>+</sup> Calcd. for [C<sub>44</sub>H<sub>43</sub>AuNO<sub>3</sub>]<sup>+</sup> 830.2903, found 830.2904.

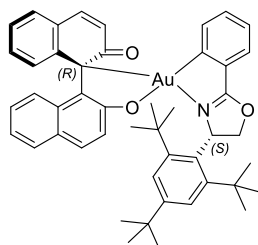

(*R,S*)-**3h**

**<sup>1</sup>H NMR (600 MHz, CDCl<sub>3</sub>)** δ 7.87 (d, *J* = 9.9 Hz, 1H), 7.69 (s, 1H), 7.63 (s, 1H), 7.56 – 7.51 (m, 1H), 7.47 – 7.37 (m, 4H), 7.28 (s, 1H), 7.25 – 7.21 (m, 1H), 7.19 (t, *J* = 7.4 Hz, 1H), 7.13 (t, *J* = 7.5 Hz, 1H), 7.04 (t, *J* = 7.6 Hz, 1H), 6.90 (m, 2H), 6.70 (t, *J* = 12.5 Hz, 1H), 6.67 – 6.62 (m, 1H), 6.60 (d, *J* = 9.8 Hz, 1H), 6.28 (d, *J* = 8.9 Hz, 1H), 5.22 (dd, *J* = 12.2, 8.8 Hz, 1H), 4.99 (dd, *J* = 12.6, 8.7 Hz, 1H), 1.68 (s, 9H), 1.52 (s, 9H), 1.41 (s, 9H).

**<sup>13</sup>C NMR (150 MHz, CDCl<sub>3</sub>)** δ 200.70, 178.57, 171.12, 151.64, 151.29, 149.45, 147.47, 144.89, 141.93, 133.89, 132.67, 130.55, 130.48, 130.35, 129.98, 129.96, 129.18, 128.82, 128.79, 128.71, 128.22, 127.88, 127.72, 126.67, 126.48, 125.90, 124.66, 122.29, 121.68, 120.40, 120.37, 78.56, 70.41, 63.74, 39.54, 37.75, 35.32, 35.16, 34.34, 31.50.

**HRMS (ESI):** [M + H]<sup>+</sup> Calcd. for [C<sub>47</sub>H<sub>49</sub>AuNO<sub>3</sub>]<sup>+</sup> 872.3372, found 872.3370.

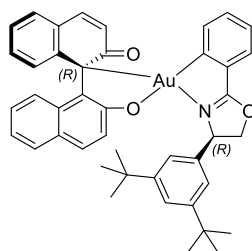

(*R,R*)-**3j**

**<sup>1</sup>H NMR (600 MHz, CDCl<sub>3</sub>)** δ 7.88 (d, *J* = 10.0 Hz, 1H), 7.63 (dd, *J* = 7.3, 2.2 Hz, 1H), 7.59 (d, *J* = 9.0 Hz, 1H), 7.49 (dd, *J* = 7.6, 1.4 Hz, 1H), 7.45 (s, 3H), 7.41 (dt, *J* = 7.0, 0.9 Hz, 1H), 7.27 (d, *J* = 1.2 Hz, 1H), 7.25 – 7.22 (m, 2H), 7.22 – 7.18 (m, 1H), 7.16 (td, *J* = 7.4,

1.2 Hz, 1H), 7.04 – 6.99 (m, 2H), 6.99 – 6.94 (m, 2H), 6.69 (d,  $J = 8.5$  Hz, 1H), 6.58 (d,  $J = 9.8$  Hz, 1H), 5.73 (dd,  $J = 9.8, 5.8$  Hz, 1H), 5.18 (t,  $J = 9.4$  Hz, 1H), 5.09 (dd,  $J = 9.0, 5.8$  Hz, 1H), 1.36 (s, 18H).

$^{13}\text{C}$  NMR (150 MHz,  $\text{CDCl}_3$ )  $\delta$  200.84, 178.83, 170.68, 151.61, 147.13, 145.02, 140.98, 137.33, 133.80, 132.89, 130.53, 130.39, 130.32, 129.74, 129.51, 129.06, 128.96, 128.83, 128.81, 128.25, 127.93, 126.82, 126.62, 126.08, 125.27, 122.75, 121.87, 121.64, 120.81, 120.68, 78.82, 70.07, 66.08, 35.18, 31.64.

HRMS (ESI):  $[\text{M} + \text{H}]^+$  Calcd. for  $[\text{C}_{43}\text{H}_{41}\text{AuNO}_3]^+$  816.2746, found 816.2749.

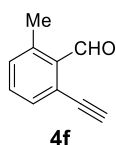

$^1\text{H}$  NMR (400 MHz,  $\text{CDCl}_3$ )  $\delta$  10.75 (s, 1H), 7.51 – 7.46 (m, 1H), 7.40 (t,  $J = 7.6$  Hz, 1H), 7.24 (d,  $J = 7.7$  Hz, 1H), 3.45 (s, 1H), 2.61 (s, 3H).

$^{13}\text{C}$  NMR (100 MHz,  $\text{CDCl}_3$ )  $\delta$  193.96, 140.86, 134.72, 132.75, 132.65, 132.12, 127.35, 84.62, 80.13, 21.47.

HRMS (ESI):  $[\text{M} + \text{H}]^+$  Calcd. for  $[\text{C}_{10}\text{H}_9\text{O}_3]^+$  145.0648, found 145.0648.

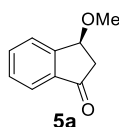

$^1\text{H}$  NMR (600 MHz,  $\text{CDCl}_3$ )  $\delta$  7.76 (d,  $J = 7.8$  Hz, 1H), 7.71 – 7.65 (m, 2H), 7.51 – 7.47 (m, 1H), 5.03 (dd,  $J = 6.5, 2.8$  Hz, 1H), 3.50 (s, 3H), 3.00 (dd,  $J = 18.5, 6.5$  Hz, 1H), 2.66 (dd,  $J = 18.5, 2.8$  Hz, 1H).

HPLC (Chiralpak IC column, 98:2 hexane/isopropanol, 1 mL/min),  $t_R = 32.0$  min (minor), 34.9 min (major); ee = 99%.

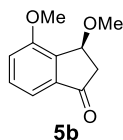

$^1\text{H}$  NMR (400 MHz,  $\text{CDCl}_3$ )  $\delta$  7.45 (t,  $J = 7.8$  Hz, 1H), 7.34 (d,  $J = 7.7$  Hz, 1H), 7.11 (d,  $J = 8.0$  Hz, 1H), 5.15 (dd,  $J = 6.4, 1.6$  Hz, 1H), 3.93 (s, 3H), 3.45 (s, 3H), 2.90 (dd,  $J = 18.8, 6.3$  Hz, 1H), 2.68 (dd,  $J = 18.8, 1.6$  Hz, 1H).

$^{13}\text{C}$  NMR (100 MHz,  $\text{CDCl}_3$ )  $\delta$  203.98, 157.85, 140.71, 138.88, 131.62, 116.27, 115.10, 74.71, 57.25, 55.92, 43.32.

HRMS (ESI):  $[\text{M} + \text{H}]^+$  Calcd. for  $[\text{C}_{11}\text{H}_{13}\text{O}_3]^+$  193.0859, found 193.0862.

HPLC (Chiralpak IC column, 50:50 hexane/isopropanol, 1 mL/min),  $t_R = 10.6$  min (minor), 12.7 min (major); ee = 72%.

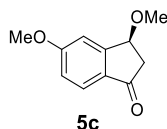

$^1\text{H}$  NMR (600 MHz,  $\text{CDCl}_3$ )  $\delta$  7.68 (d,  $J = 8.4$  Hz, 1H), 7.10 (d,  $J = 2.3$  Hz, 1H), 7.00 (dd,  $J = 8.5, 2.3$  Hz, 1H), 4.99 – 4.95 (m, 1H), 3.91 (s, 3H), 3.49 (s, 3H), 2.97 (dd,  $J = 18.4, 6.4$  Hz, 1H), 2.64 (dd,  $J = 18.4, 3.0$  Hz, 1H).

HPLC (Chiralpak IC column, 50:50 hexane/isopropanol, 1 mL/min),  $t_R = 8.4$  min (major), 9.5 min (minor); ee = 97%.

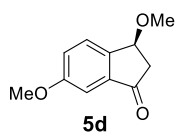

$^1\text{H}$  NMR (600 MHz,  $\text{CDCl}_3$ )  $\delta$  7.55 (d,  $J = 8.4$  Hz, 1H), 7.22 (dd,  $J = 8.4, 2.5$  Hz, 1H), 7.15 (d,  $J = 2.5$  Hz, 1H), 4.95 (dd,  $J = 6.2, 2.5$  Hz, 1H), 3.82 (s, 3H), 3.45 (s, 3H), 2.98 (dd,  $J = 18.7, 6.2$  Hz, 1H), 2.64 (dd,  $J = 18.6, 2.4$  Hz, 1H).

$^{13}\text{C}$  NMR (100 MHz,  $\text{CDCl}_3$ )  $\delta$  202.98, 161.02, 146.07, 138.30, 127.38, 124.09, 104.47, 76.29, 56.96, 55.65, 43.99.

HRMS (ESI):  $[\text{M} + \text{H}]^+$  Calcd. for  $[\text{C}_{11}\text{H}_{13}\text{O}_3]^+$  193.0859, found 193.0862.

HPLC (Chiralpak IC column, 50:50 hexane/isopropanol, 1 mL/min),  $t_R = 7.6$  min (minor), 8.3 min (major); ee = 82%.

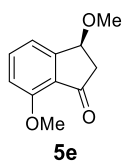

$^1\text{H}$  NMR (400 MHz,  $\text{CDCl}_3$ )  $\delta$  7.60 (t,  $J = 7.9$  Hz, 1H), 7.22 (d,  $J = 7.6$  Hz, 1H), 6.89 (d,  $J = 8.3$  Hz, 1H), 4.94 (dd,  $J = 6.5, 3.0$  Hz, 1H), 3.94 (s, 4H), 3.46 (s, 3H), 2.95 (dd,  $J = 18.3, 6.5$  Hz, 1H), 2.64 (dd,  $J = 18.3, 3.0$  Hz, 1H).

$^{13}\text{C}$  NMR (100 MHz,  $\text{CDCl}_3$ )  $\delta$  200.76, 157.63, 155.76, 136.95, 124.87, 118.19, 111.12, 76.21, 57.07, 56.01, 43.92.

**HRMS (ESI):** [M + H]<sup>+</sup> Calcd. for [C<sub>11</sub>H<sub>13</sub>O<sub>3</sub>]<sup>+</sup> 193.0859, found 193.0861.

**HPLC** (Chiralpak IC column, 50:50 hexane/isopropanol, 1 mL/min), t<sub>R</sub> = 16.6 min (minor), 32.0 min (major); ee = 40%.

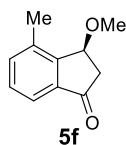

**<sup>1</sup>H NMR (600 MHz, CDCl<sub>3</sub>)** δ 7.59 (d, *J* = 7.6 Hz, 1H), 7.45 (dt, *J* = 7.3, 1.0 Hz, 1H), 7.39 (t, *J* = 7.5 Hz, 1H), 5.09 (dd, *J* = 6.4, 2.0 Hz, 1H), 3.43 (s, 3H), 2.95 (dd, *J* = 18.8, 6.4 Hz, 1H), 2.69 (dd, *J* = 18.8, 2.0 Hz, 1H), 2.48 (s, 3H).

**<sup>13</sup>C NMR (150 MHz, CDCl<sub>3</sub>)** δ 204.00, 151.15, 137.77, 137.18, 136.45, 129.99, 120.82, 76.29, 56.74, 42.78, 29.84, 17.80.

**HRMS (ESI):** [M + H]<sup>+</sup> Calcd. for [C<sub>11</sub>H<sub>13</sub>O<sub>2</sub>]<sup>+</sup> 177.0910, found 177.0911.

**HPLC** (Chiralpak IC column, 80:20 hexane/isopropanol, 1 mL/min), t<sub>R</sub> = 11.1 min (minor), 13.0 min (major); ee = 46%.

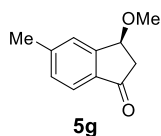

**<sup>1</sup>H NMR (400 MHz, CDCl<sub>3</sub>)** δ 7.65 (d, *J* = 7.9 Hz, 1H), 7.49 (s, 1H), 7.29 (d, *J* = 8.1 Hz, 1H), 4.98 (dd, *J* = 6.5, 2.9 Hz, 1H), 3.49 (s, 3H), 2.98 (dd, *J* = 18.5, 6.4 Hz, 1H), 2.64 (dd, *J* = 18.6, 2.8 Hz, 2H), 2.47 (s, 3H).

**HPLC** (Chiralpak IC column, 80:20 hexane/isopropanol, 1 mL/min), t<sub>R</sub> = 11.1 min (major), 12.8 min (minor); ee = 99%.

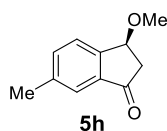

**<sup>1</sup>H NMR (400 MHz, CDCl<sub>3</sub>)** δ 7.58 – 7.49 (m, 2H), 7.46 (dd, *J* = 7.8, 1.8 Hz, 1H), 4.97 (dd, *J* = 6.4, 2.8 Hz, 1H), 3.45 (s, 3H), 2.95 (dd, *J* = 18.6, 6.4 Hz, 1H), 2.62 (dd, *J* = 18.8, 2.6 Hz, 1H), 2.40 (s, 3H).

**HPLC** (Chiralpak IC column, 90:10 hexane/isopropanol, 1 mL/min), t<sub>R</sub> = 15.6 min (minor), 18.8 min (major); ee = 92%.

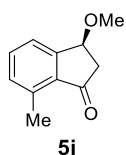

**<sup>1</sup>H NMR (400 MHz, CDCl<sub>3</sub>)** δ 7.54 – 7.48 (m, 2H), 7.24 – 7.20 (m, 1H), 4.96 (dd, *J* = 6.5, 2.9 Hz, 1H), 3.48 (s, 3H), 2.95 (dd, *J* = 18.4, 6.5 Hz, 1H), 2.68 – 2.60 (m, 4H).

**<sup>13</sup>C NMR (100 MHz, CDCl<sub>3</sub>)** δ 204.04, 153.98, 138.60, 134.41, 134.32, 131.45, 123.90, 76.35, 57.11, 44.00, 18.51.

**HRMS (ESI):** [M + H]<sup>+</sup> Calcd. for [C<sub>11</sub>H<sub>13</sub>O<sub>2</sub>]<sup>+</sup> 177.0910, found 177.0913.

**HPLC** (Chiralpak IC column, 98:2 hexane/isopropanol, 1 mL/min), t<sub>R</sub> = 21.9 min (minor), 24.2 min (major); ee = 11%.

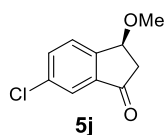

**<sup>1</sup>H NMR (60 MHz, CDCl<sub>3</sub>)** δ 7.72 (t, *J* = 1.3 Hz, 1H), 7.65 – 7.62 (m, 2H), 4.99 (dd, *J* = 6.4, 2.8 Hz, 1H), 3.49 (s, 3H), 3.03 (dd, *J* = 18.6, 6.4 Hz, 1H), 2.69 (dd, *J* = 18.6, 2.8 Hz, 1H).

**<sup>13</sup>C NMR (100 MHz, CDCl<sub>3</sub>)** δ 201.66, 150.19, 140.35, 136.26, 135.18, 127.91, 123.33, 75.86, 57.43, 43.40.

**HRMS (ESI):** [M + H]<sup>+</sup> Calcd. for [C<sub>10</sub>H<sub>10</sub>O<sub>2</sub>]<sup>+</sup> 197.0364, found 197.0366.

**HPLC** (Chiralpak IC column, 90:10 hexane/isopropanol, 1 mL/min), t<sub>R</sub> = 10.8 min (minor), 11.6 min (major); ee = 92%.

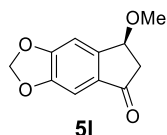

**<sup>1</sup>H NMR (400 MHz, CDCl<sub>3</sub>)** δ 7.09 (s, 1H), 7.03 (s, 1H), 6.11 – 6.08 (m, 2H), 4.90 (dd, *J* = 6.2, 2.7 Hz, 1H), 3.46 (s, 3H), 2.96 (dd, *J* = 18.5, 6.2 Hz, 1H), 2.63 (dd, *J* = 18.4, 2.5 Hz, 1H).

**HPLC** (Chiralpak IC column, 80:20 hexane/isopropanol, 1 mL/min), t<sub>R</sub> = 22.5 min (minor), 25.4 min (major); ee = 57%.

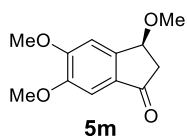

**<sup>1</sup>H NMR (400 MHz, CDCl<sub>3</sub>)** δ 7.17 (s, 1H), 7.09 (s, 1H), 4.96 (dd, *J* = 6.2, 2.6 Hz, 1H), 4.00 (s, 3H), 3.92 (s, 3H), 3.48 (s, 3H), 2.96 (dd, *J* = 18.3, 6.2 Hz, 1H), 2.63 (dd, *J* = 18.3, 2.6 Hz, 1H).

**HPLC** (Chiralpak IC column, 70:30 hexane/isopropanol, 1 mL/min), *t<sub>R</sub>* = 19.2 min (major), 20.9 min (minor); ee = 55%.

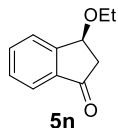

**<sup>1</sup>H NMR (400 MHz, CDCl<sub>3</sub>)** δ 7.76 (d, *J* = 7.7 Hz, 1H), 7.72 – 7.64 (m, 2H), 7.48 (t, *J* = 7.3 Hz, 1H), 5.11 (dd, *J* = 6.5, 2.9 Hz, 1H), 3.70 (qd, *J* = 7.0, 3.1 Hz, 2H), 3.02 (dd, *J* = 18.6, 6.4 Hz, 1H), 2.67 (dd, *J* = 18.6, 2.9 Hz, 1H), 1.29 (t, *J* = 7.0 Hz, 3H).

**HPLC** (Chiralpak IC column, 95:5 hexane/isopropanol, 1 mL/min), *t<sub>R</sub>* = 15.6 min (minor), 17.8 min (major); ee = 67%.

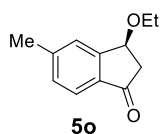

**<sup>1</sup>H NMR (400 MHz, CDCl<sub>3</sub>)** δ 7.65 (d, *J* = 7.8 Hz, 1H), 7.49 (s, 1H), 7.28 (d, *J* = 7.9 Hz, 1H), 5.06 (dd, *J* = 6.4, 2.8 Hz, 1H), 3.69 (qd, *J* = 7.0, 1.9 Hz, 2H), 2.99 (dd, *J* = 18.4, 6.4 Hz, 1H), 2.65 (dd, *J* = 18.4, 2.8 Hz, 1H), 2.47 (s, 3H), 1.30 (t, *J* = 7.0 Hz, 3H).

**<sup>13</sup>C NMR (100 MHz, CDCl<sub>3</sub>)** δ 202.94, 154.17, 146.50, 134.65, 130.83, 126.85, 123.24, 75.27, 65.49, 44.48, 29.84, 22.28, 15.64.

**HRMS** (ESI): [M + H]<sup>+</sup> Calcd. for [C<sub>12</sub>H<sub>15</sub>O<sub>2</sub>]<sup>+</sup> 191.1067, found 191.1068.

**HPLC** (Chiralpak IC column, 80:20 hexane/isopropanol, 1 mL/min), *t<sub>R</sub>* = 9.9 min (major), 10.6 min (minor); ee = 63%.

# NMR Spectra

## <sup>1</sup>H NMR of Compound S2

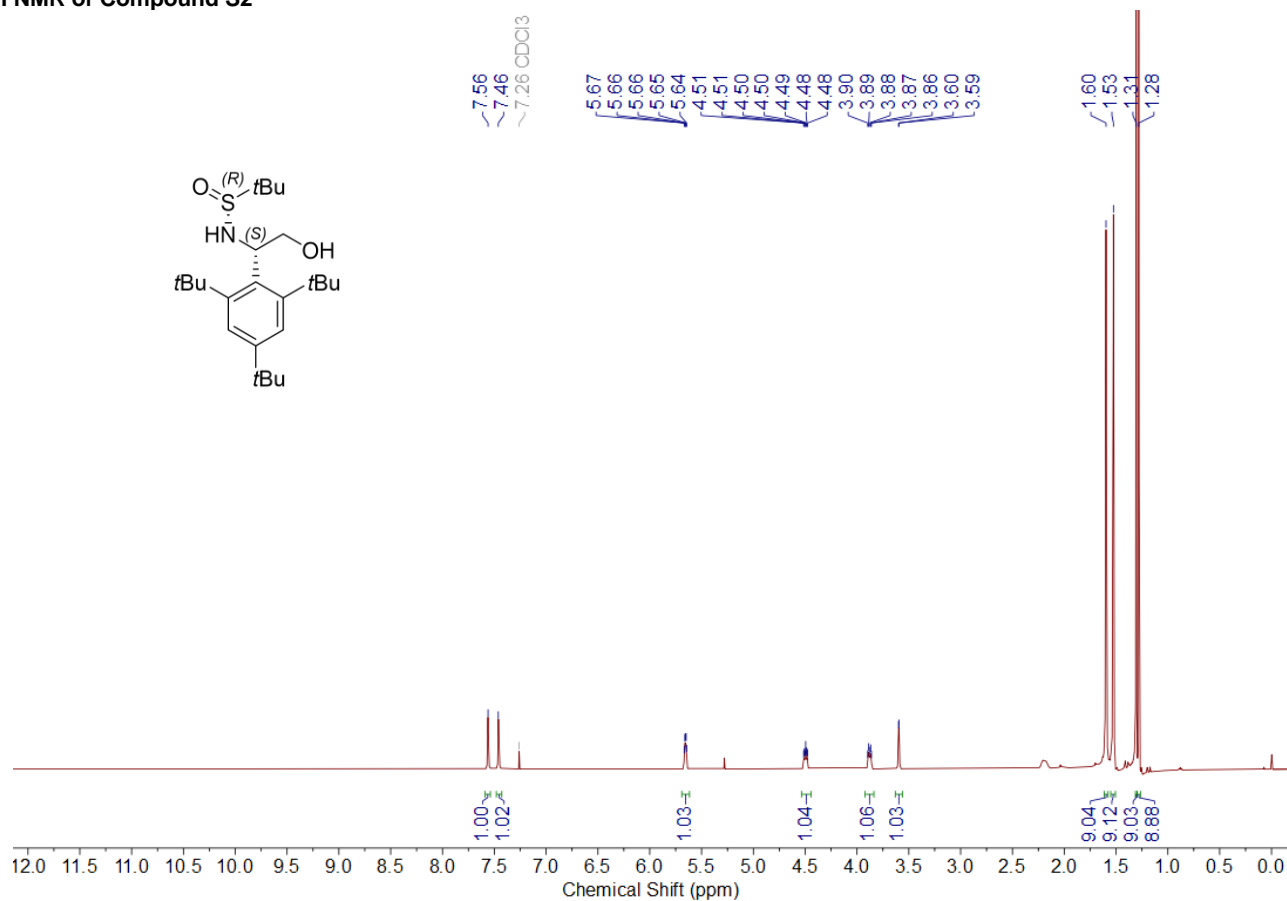

## <sup>13</sup>C NMR of Compound S2

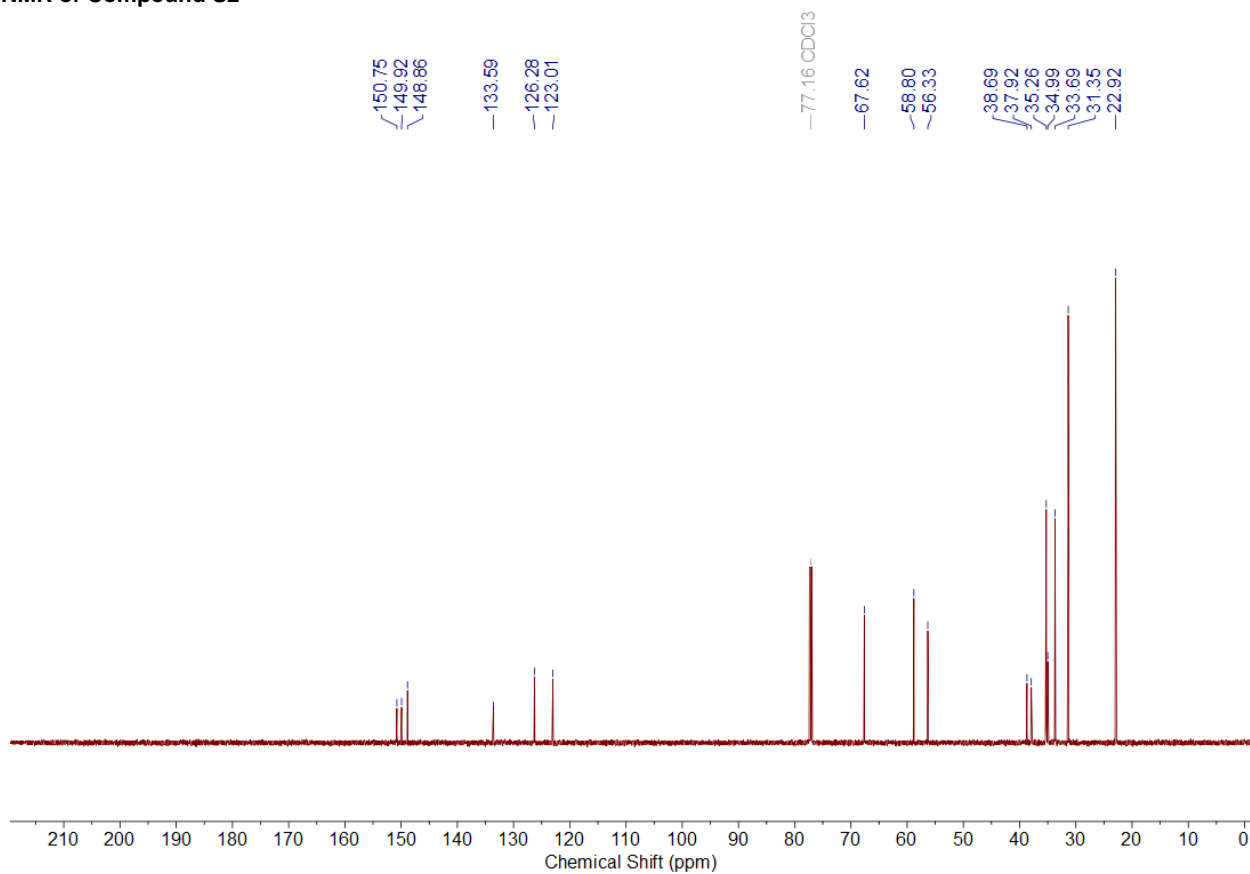

### <sup>1</sup>H NMR of Compound S3

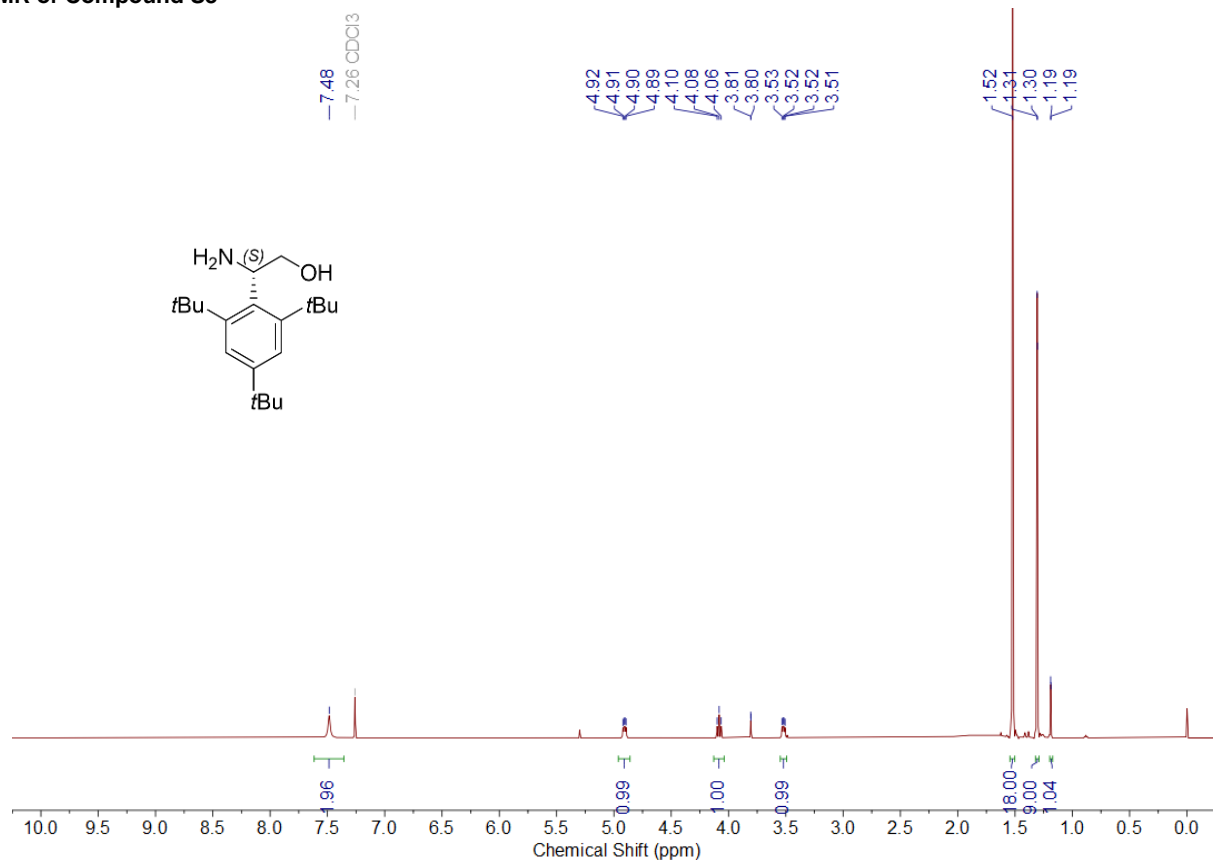

### <sup>13</sup>C NMR of Compound S3

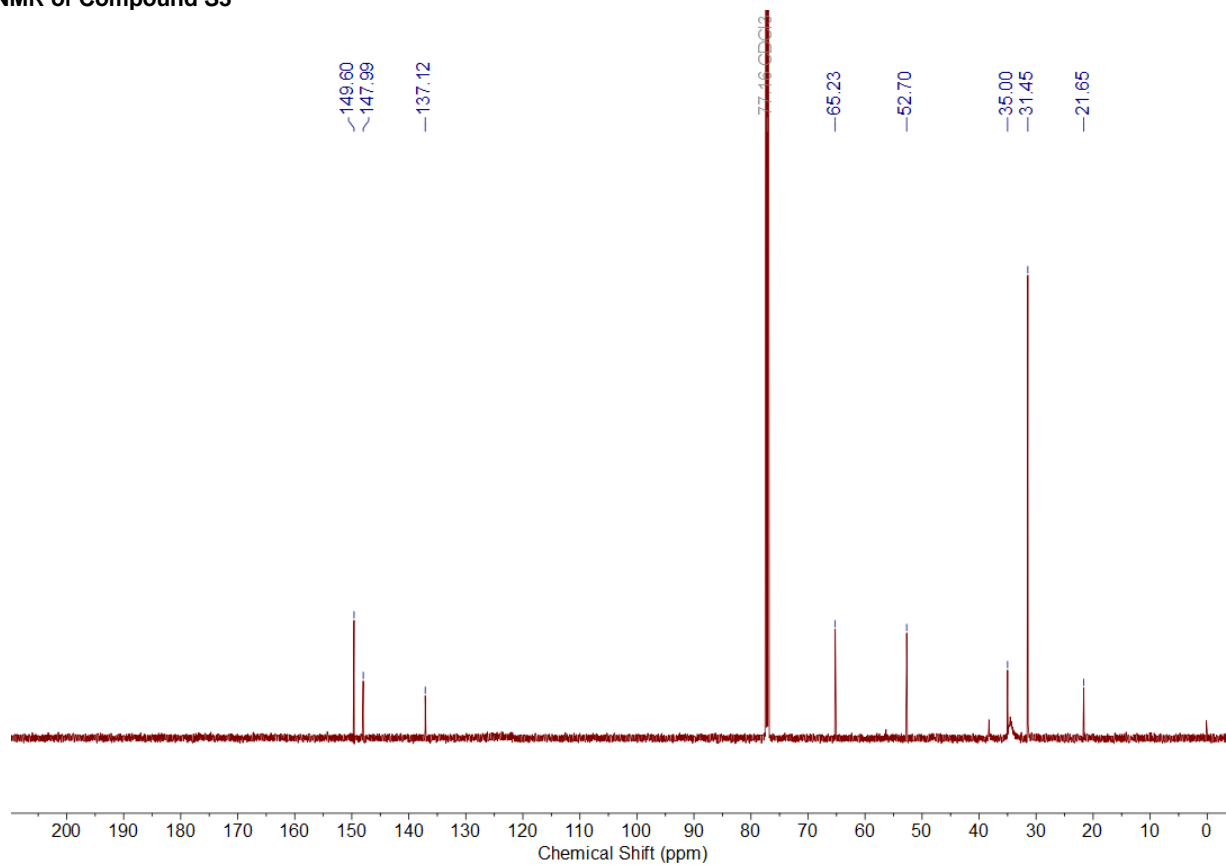

### <sup>1</sup>H NMR of Compound S4

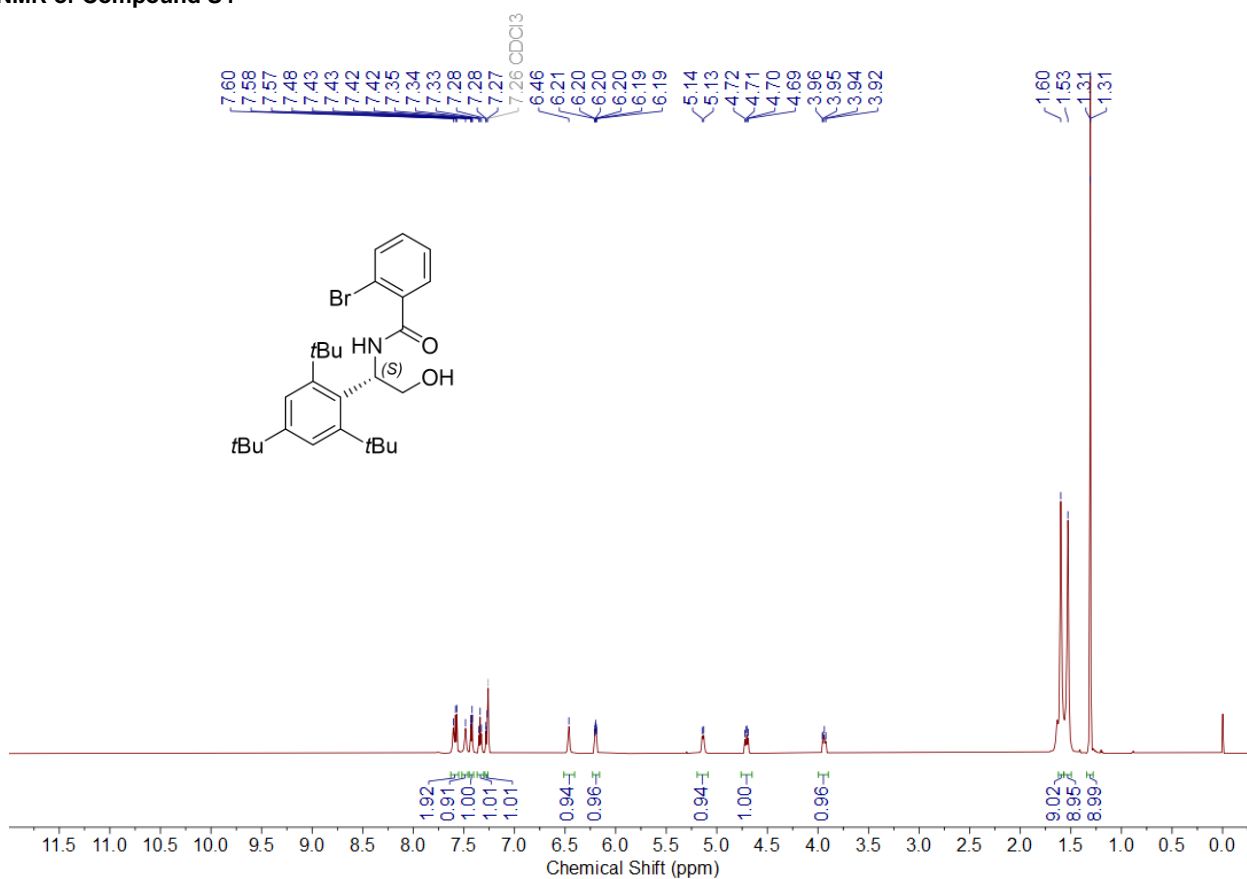

### <sup>13</sup>C NMR of Compound S4

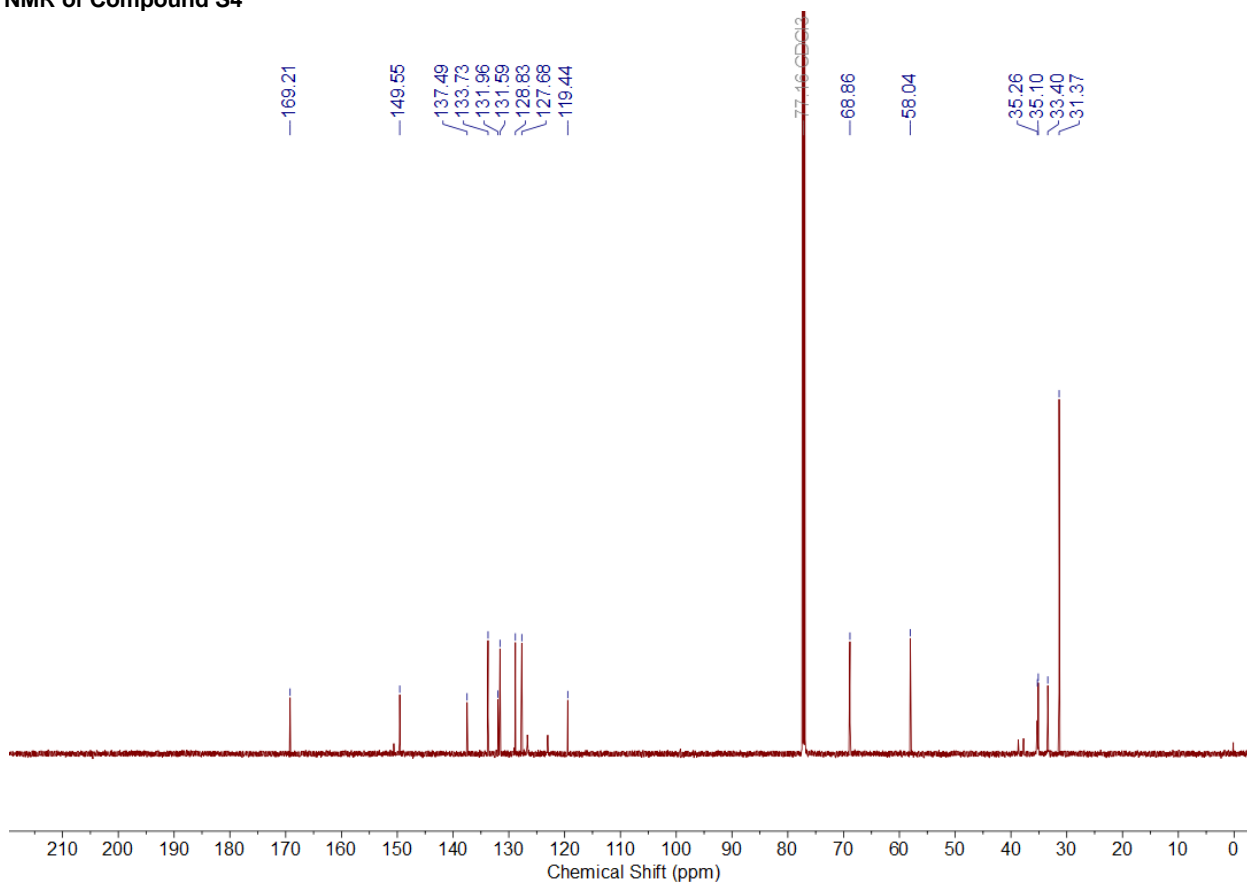



### <sup>1</sup>H NMR of Compound S5

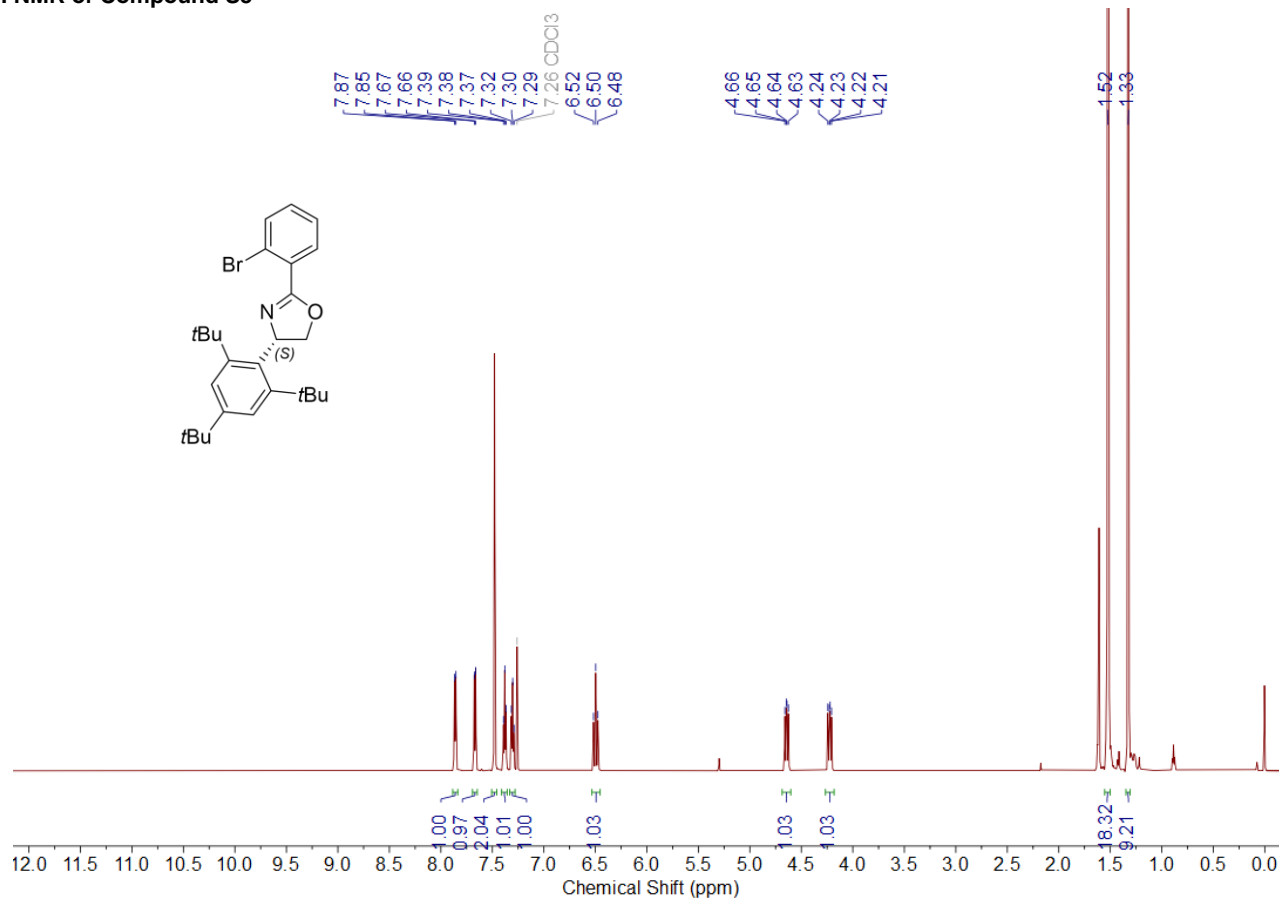

### <sup>13</sup>C NMR of Compound S5

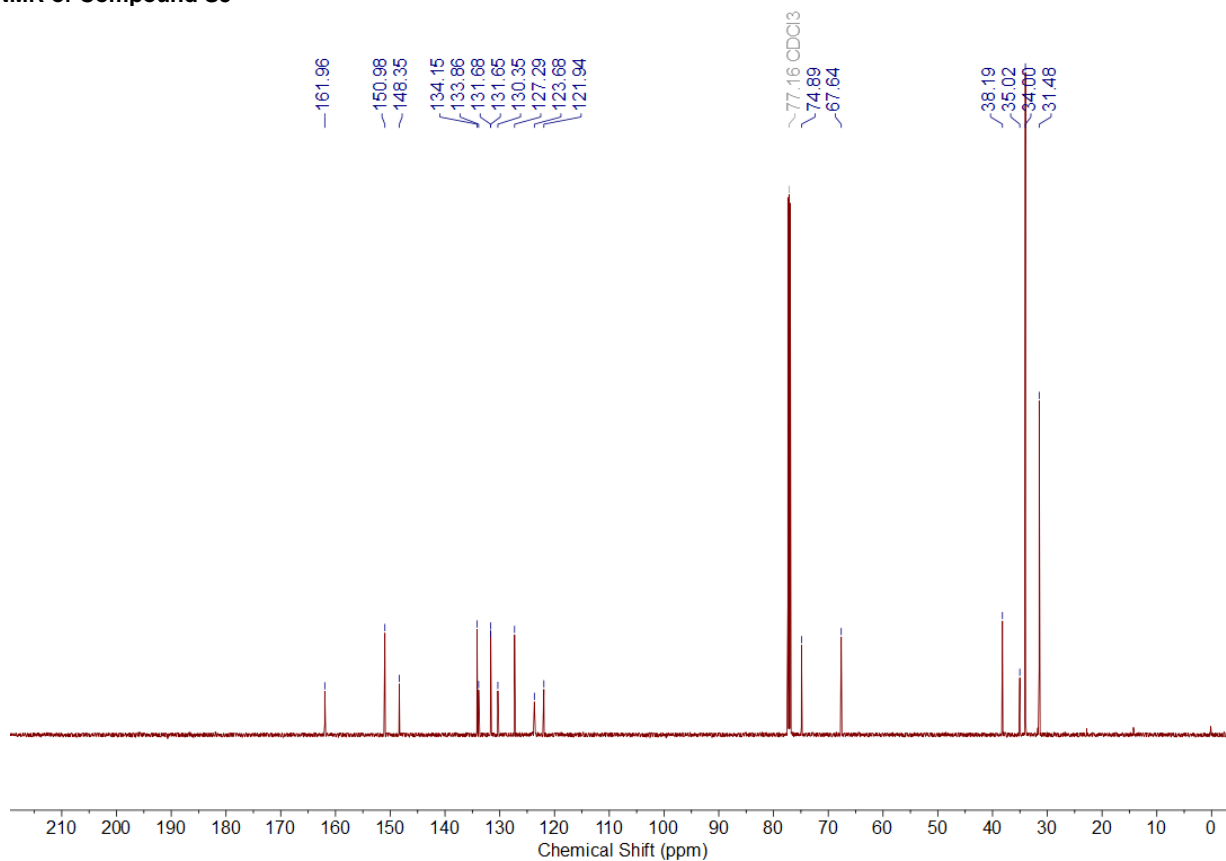

### <sup>1</sup>H NMR of Compound S6

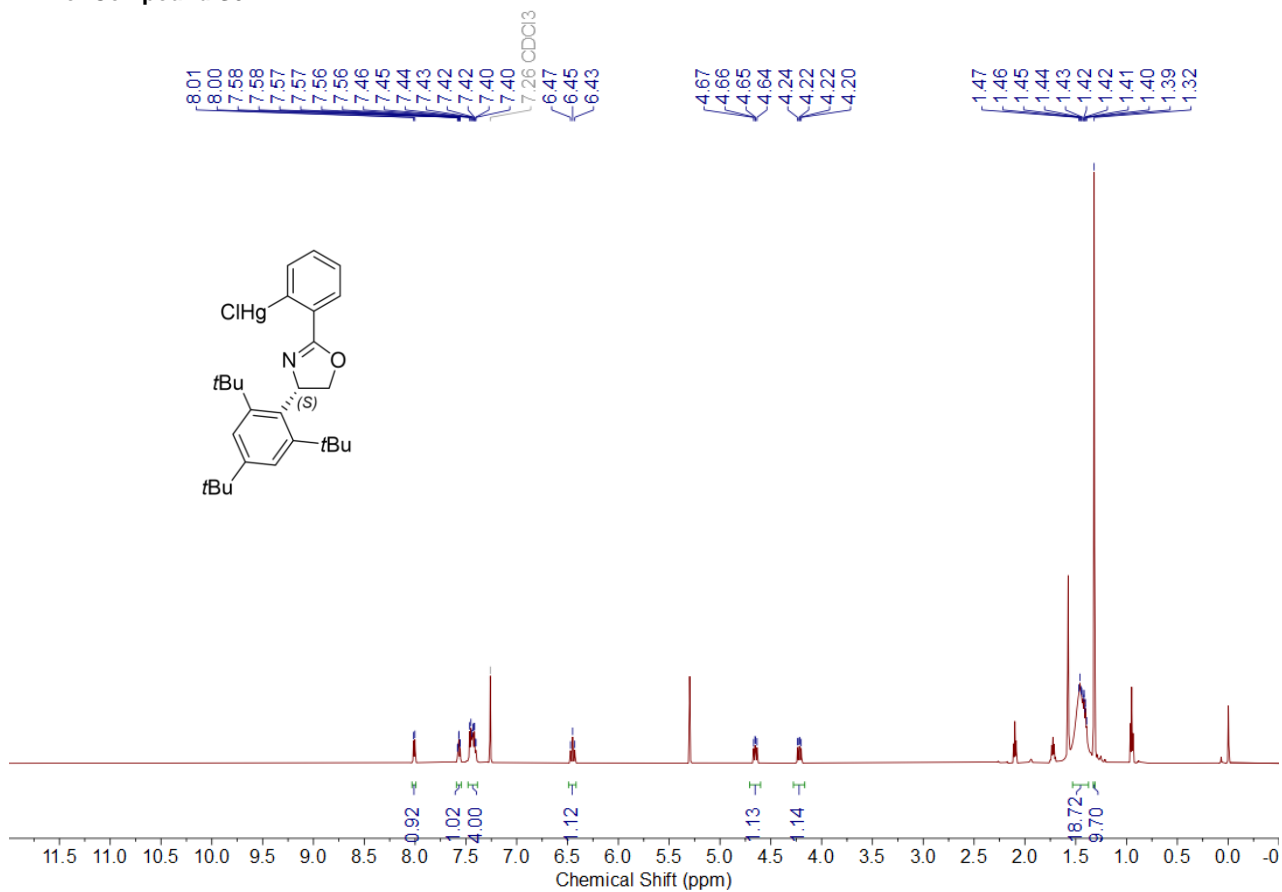

### <sup>13</sup>C NMR of Compound S6

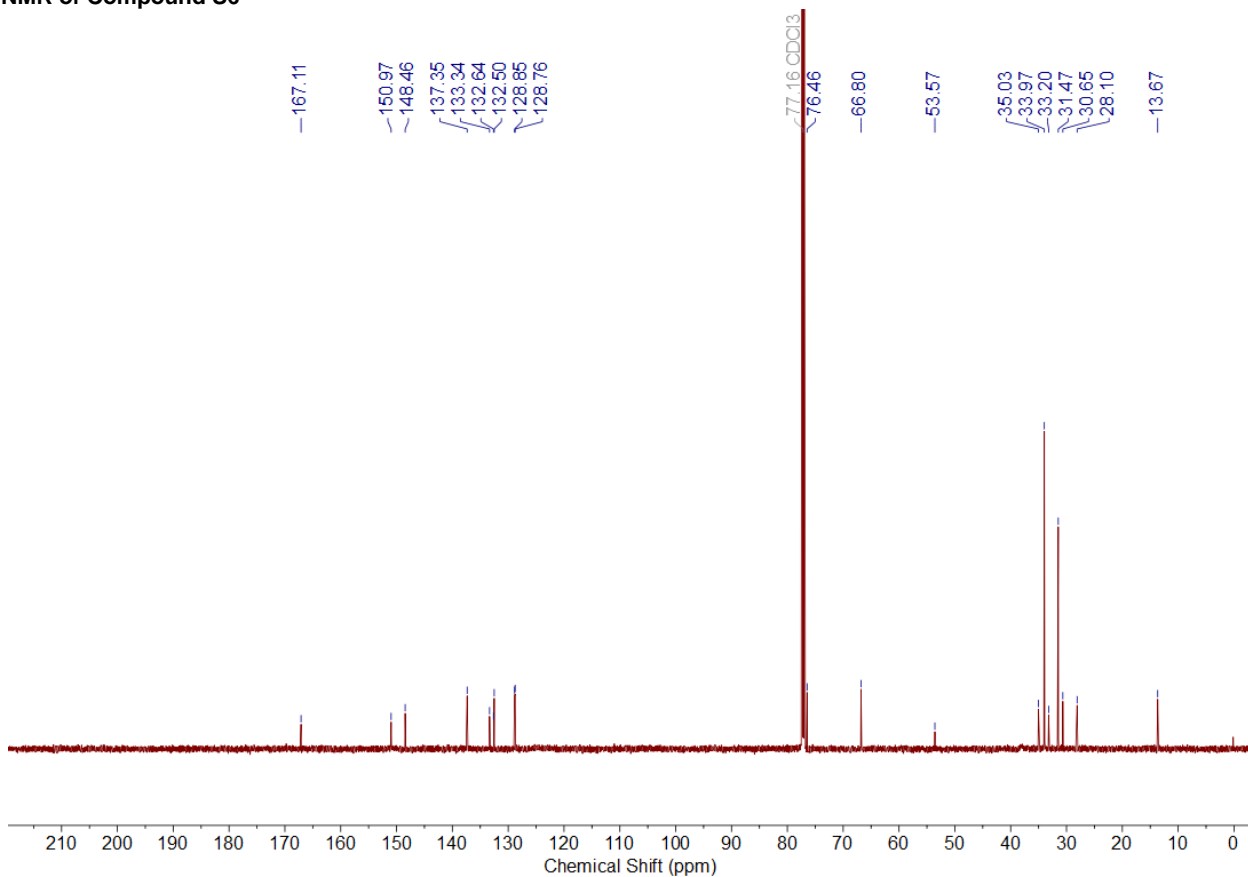

### <sup>1</sup>H NMR of (S)-1c

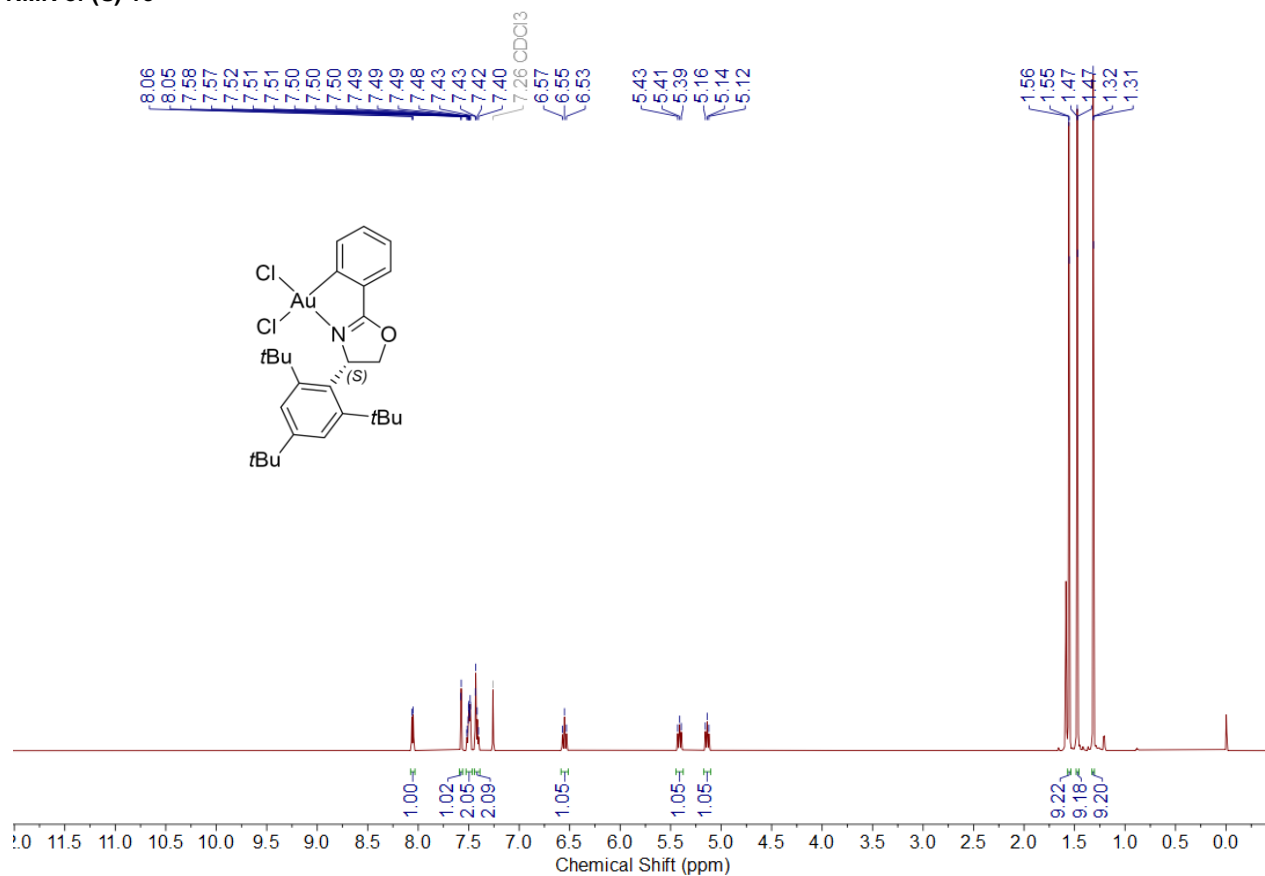

### <sup>13</sup>C NMR of (S)-1c

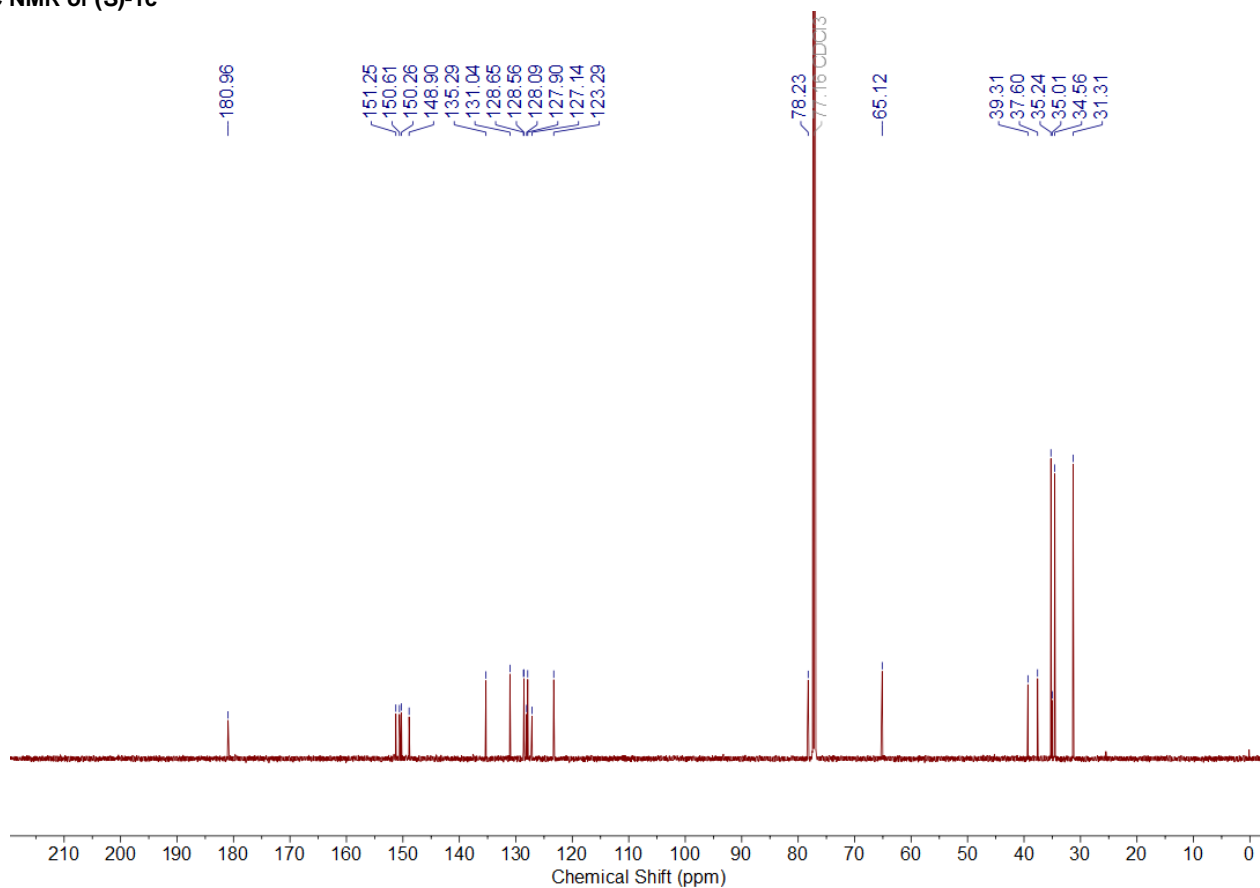

**<sup>1</sup>H NMR of (R,R)-3a and (S,S)-3a**

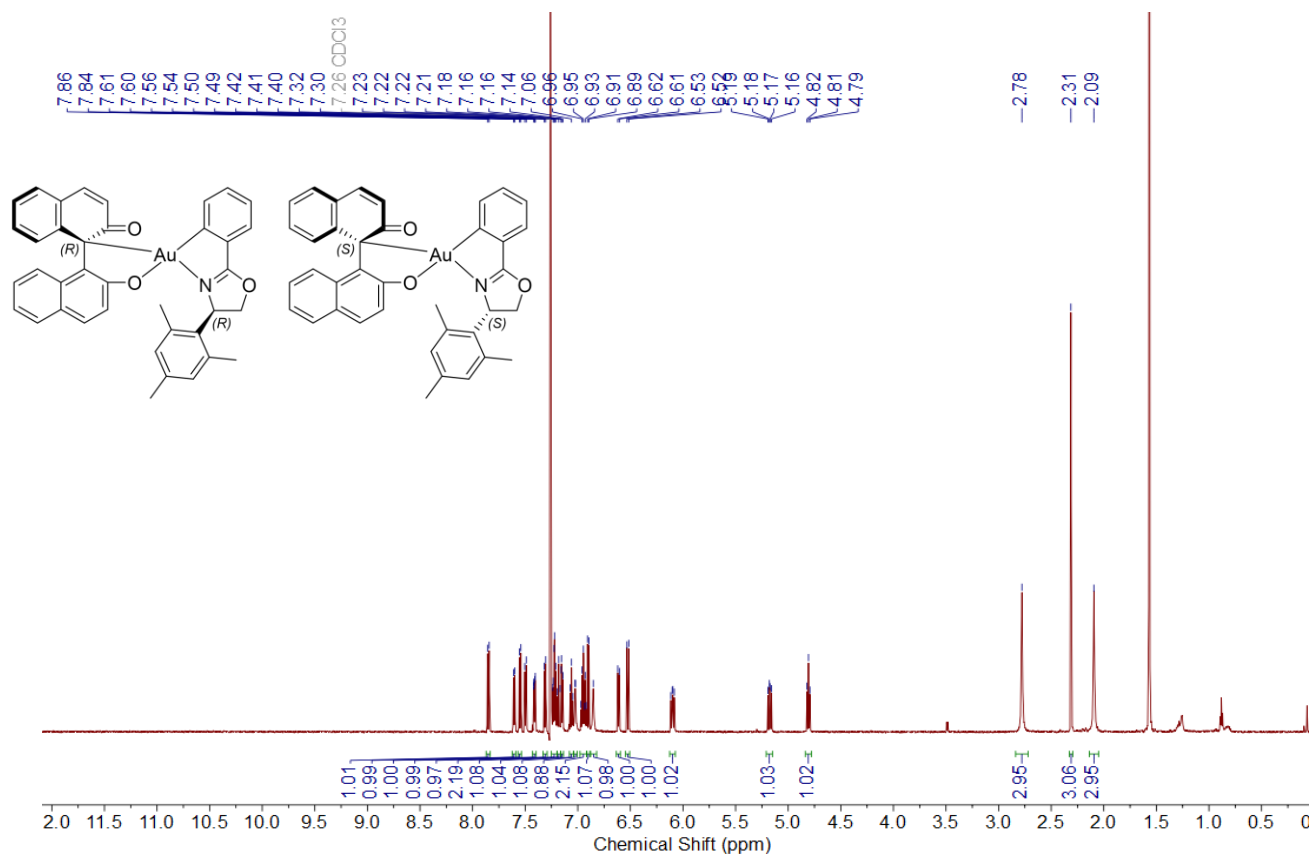

**<sup>13</sup>C NMR of (R,R)-3a and (S,S)-3a**

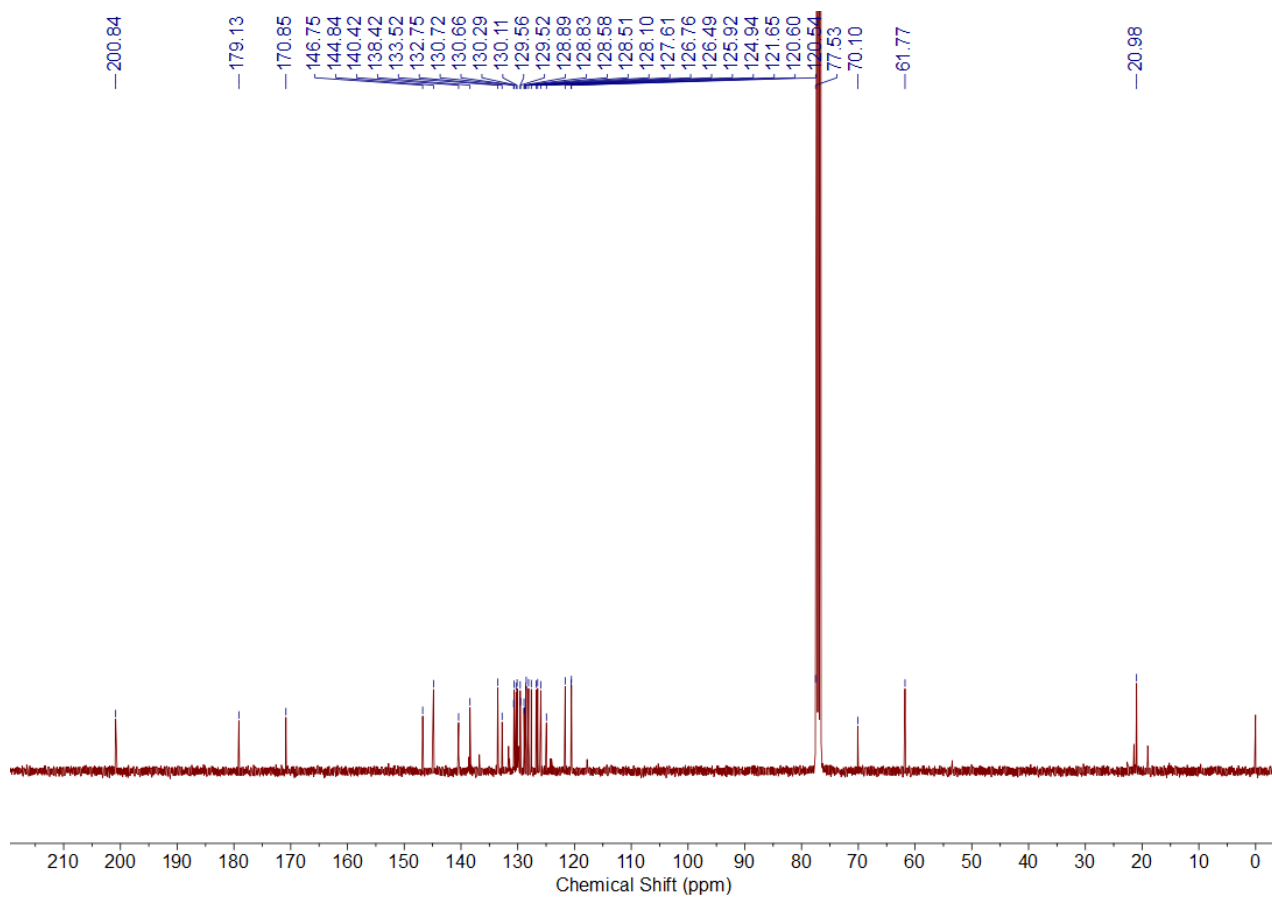

**<sup>1</sup>H NMR of (R,S)-3a and (S,R)-3a**

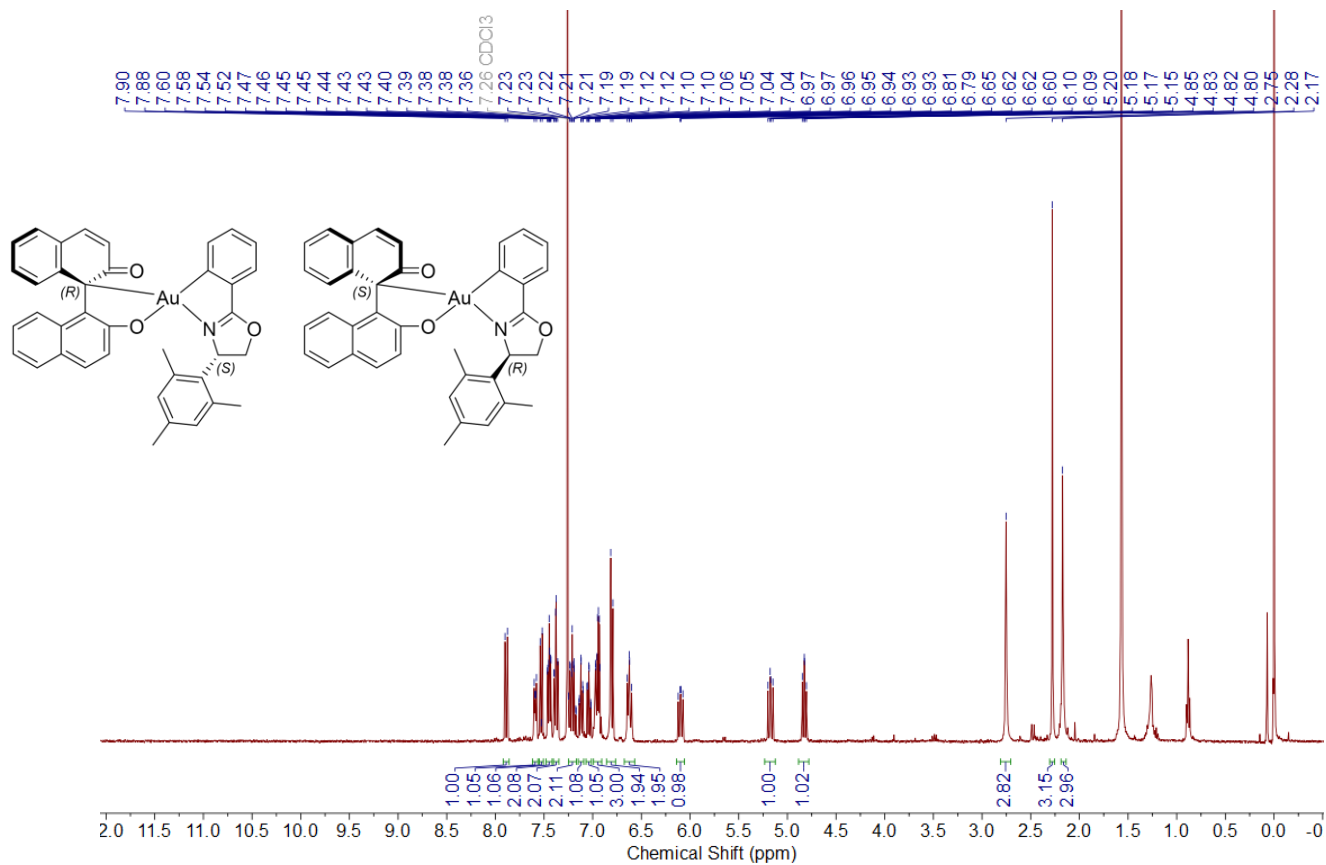

**<sup>13</sup>C NMR of (R,S)-3a and (S,R)-3a**

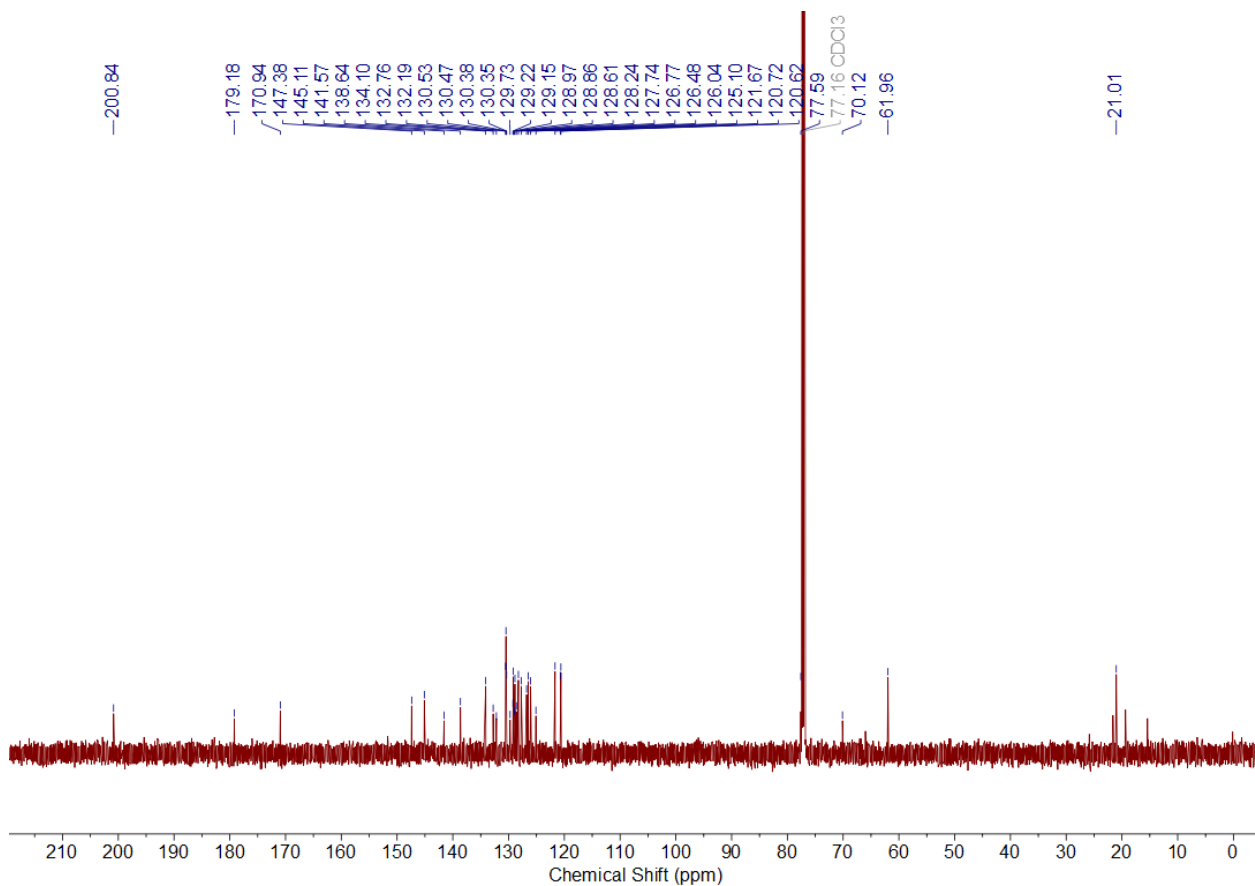

**<sup>1</sup>H NMR of (R,S)-3b**

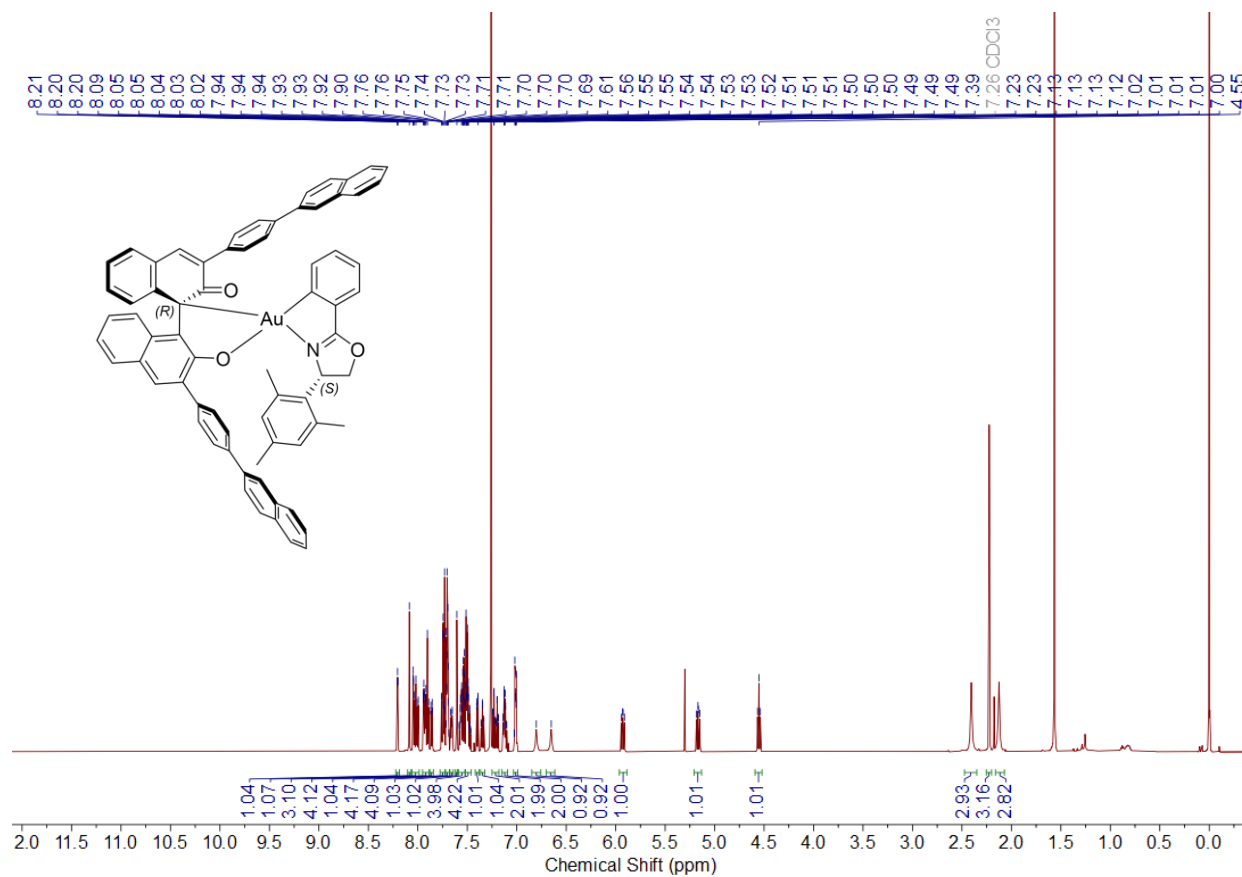

**<sup>13</sup>C NMR of (R,S)-3b**

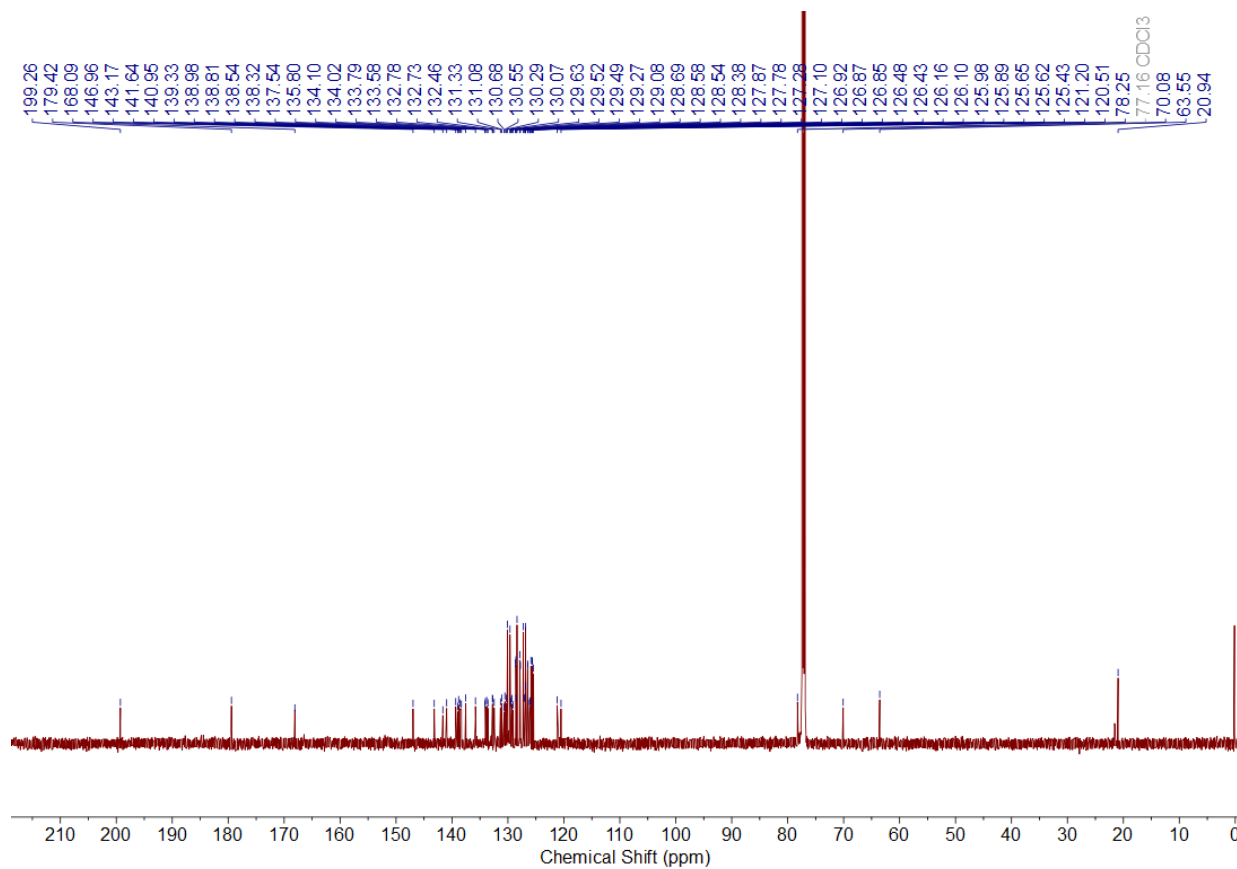

**<sup>1</sup>H NMR of (S,S)-3b**

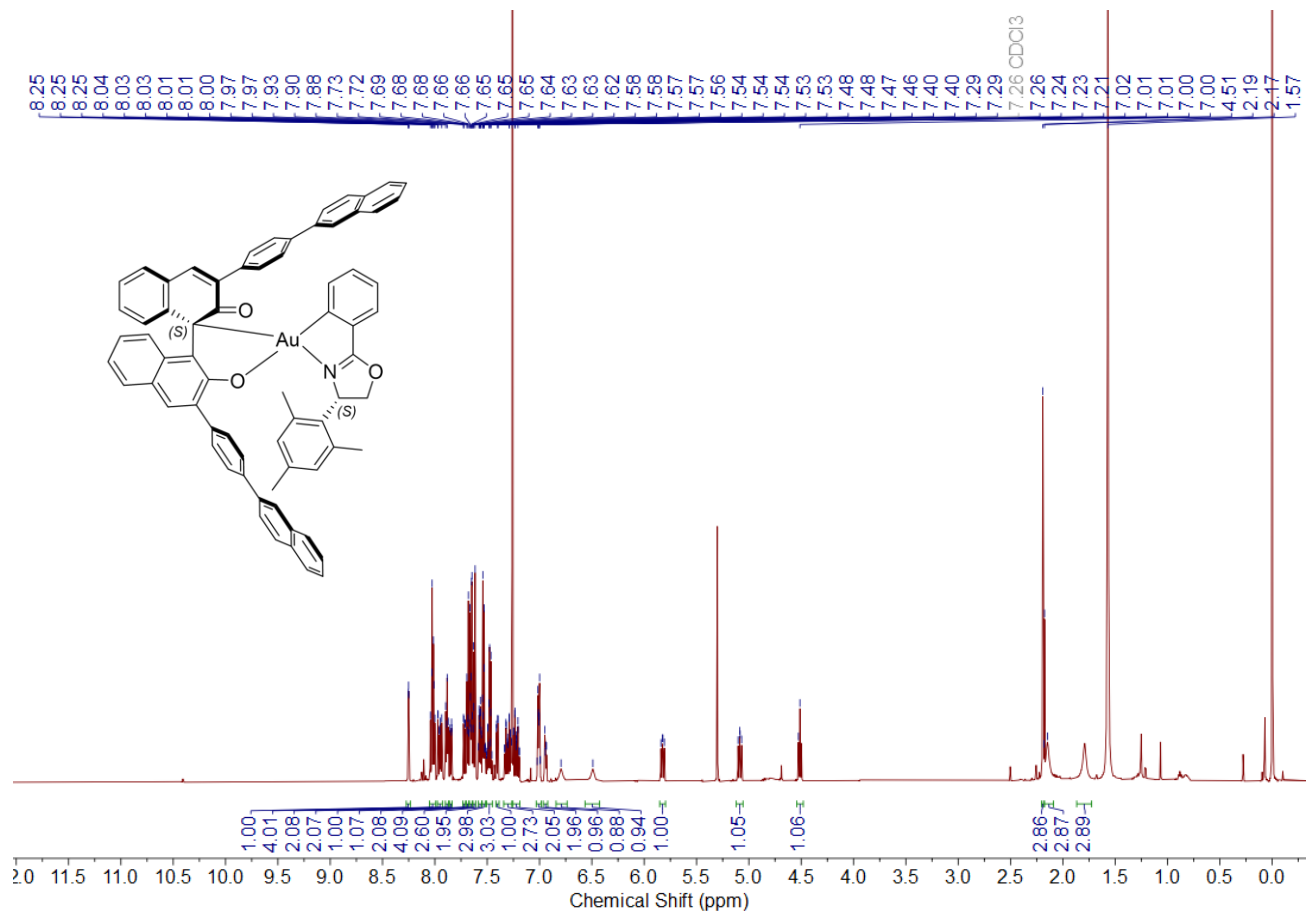

**<sup>13</sup>C NMR of (S,S)-3b**

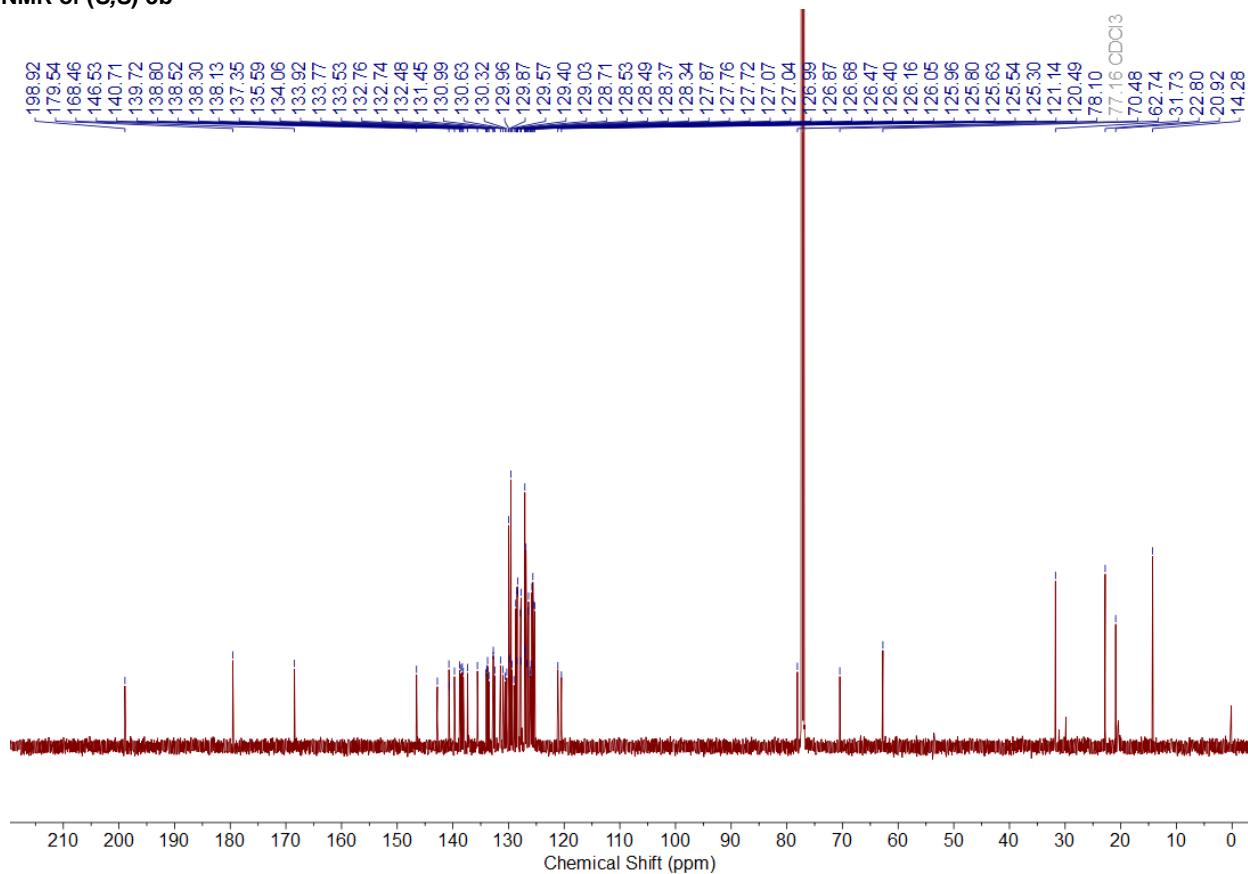

### <sup>1</sup>H NMR of (R,S)-3c

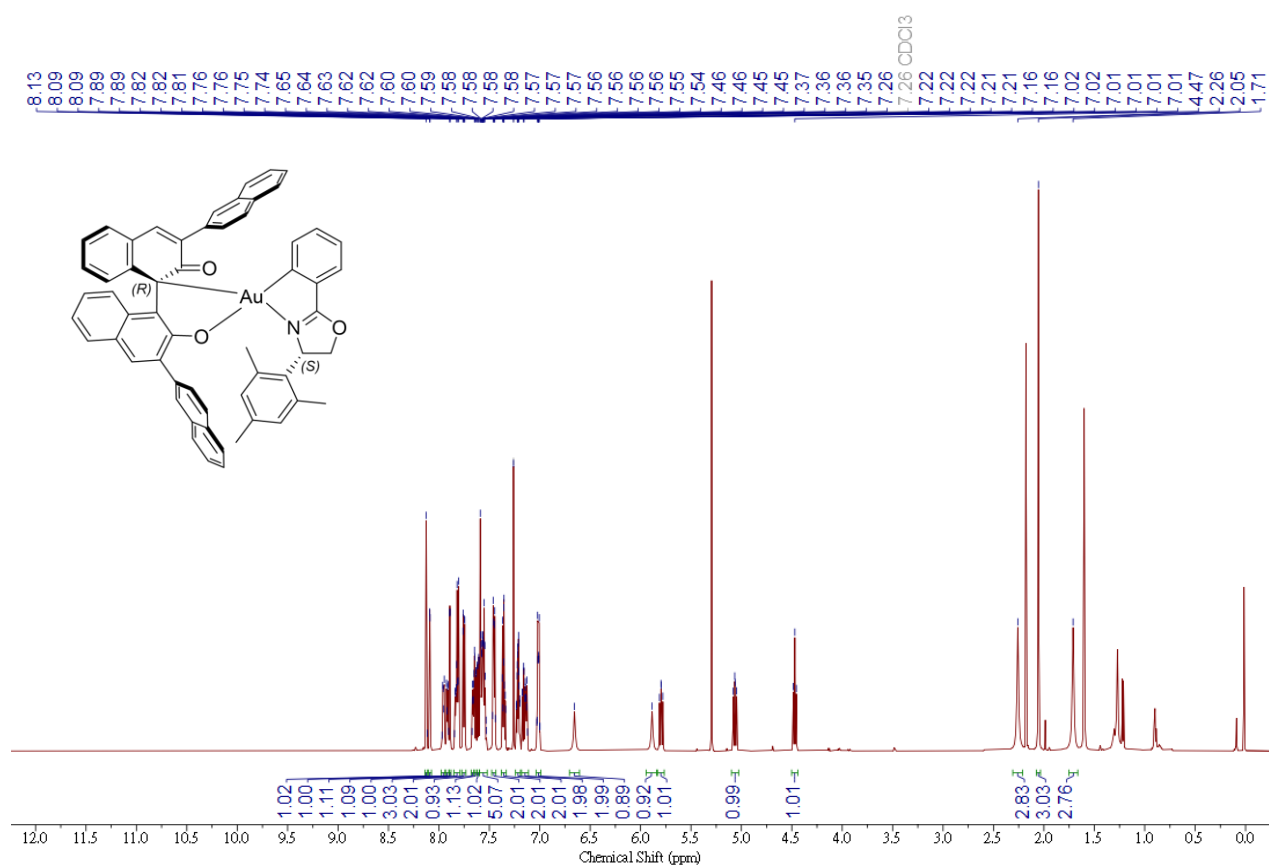

### <sup>13</sup>C NMR of (R,S)-3c

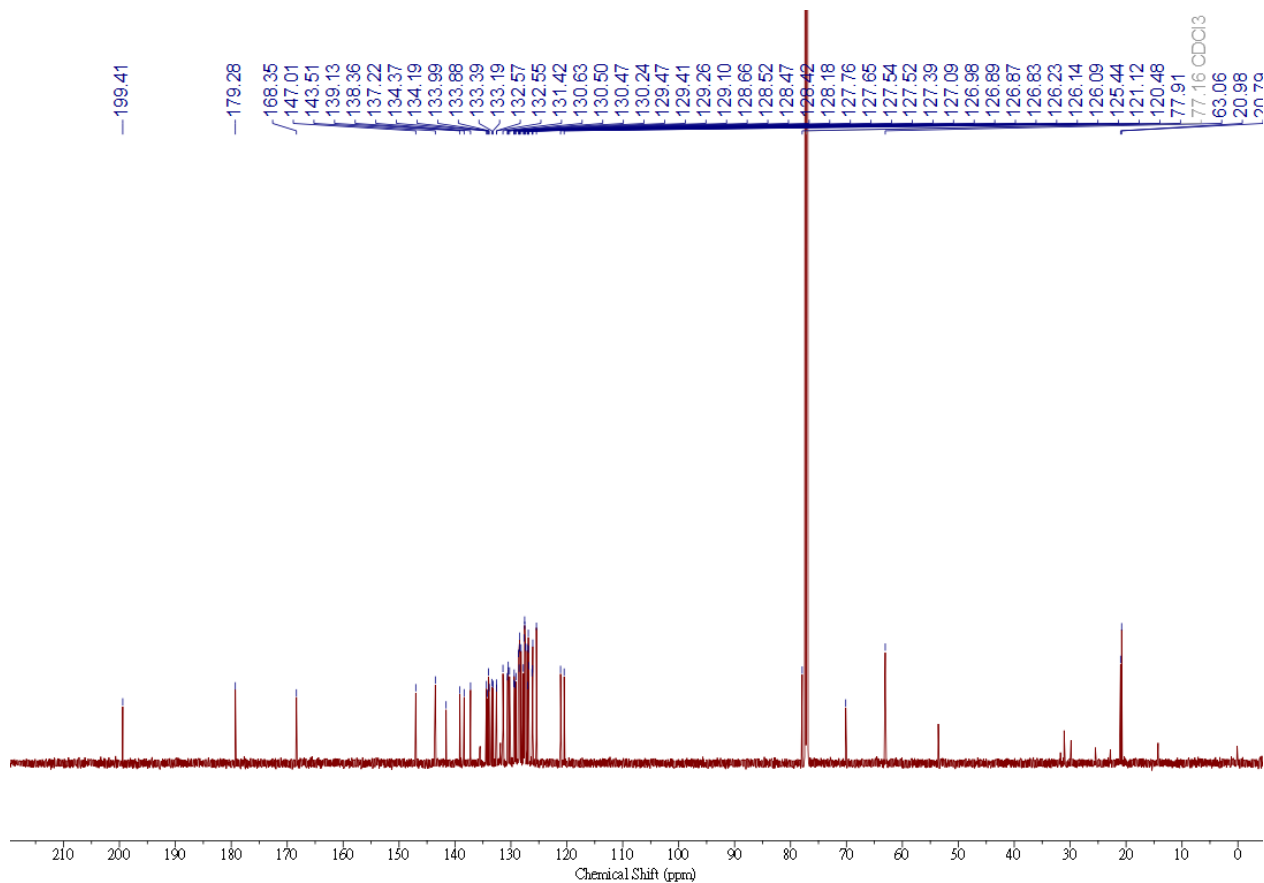



### <sup>1</sup>H NMR of (S,S)-3c

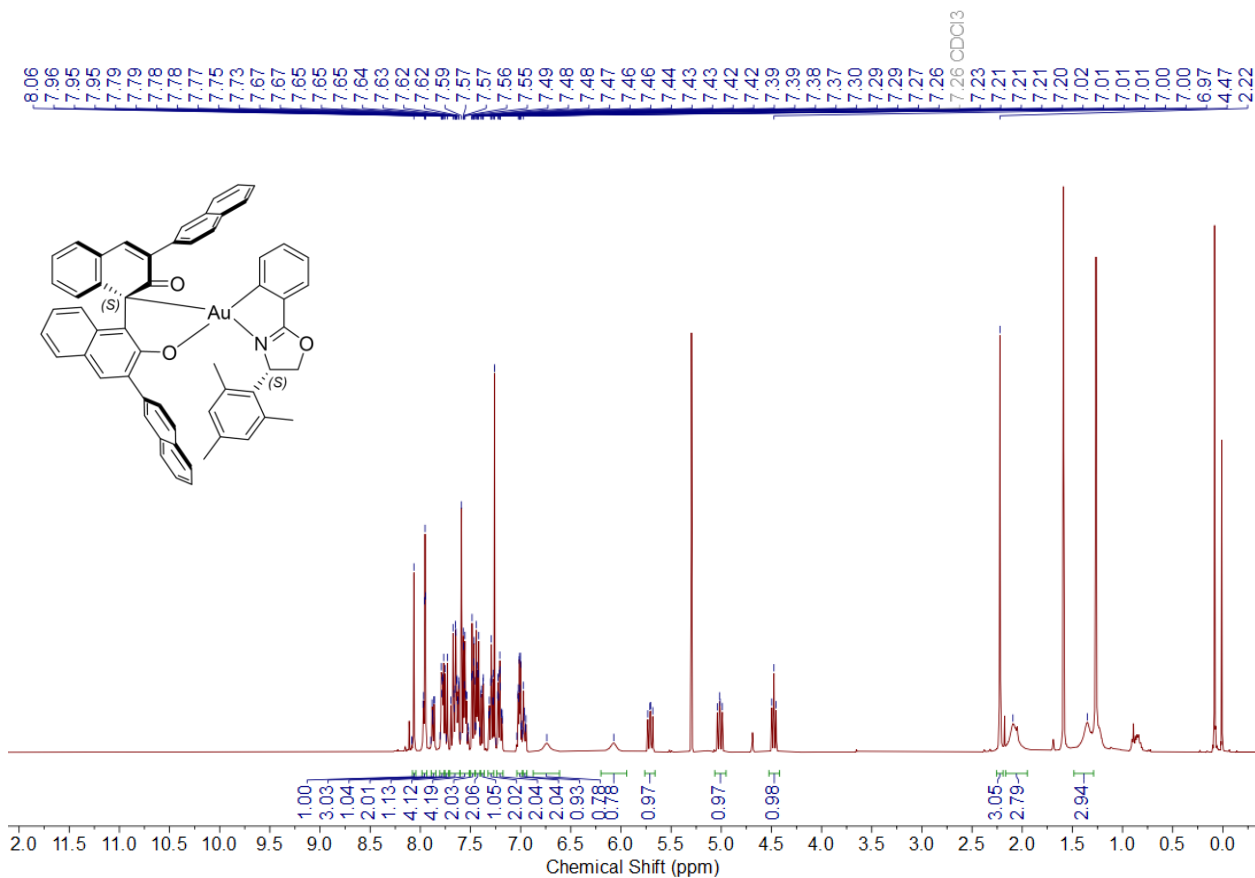

### <sup>13</sup>C NMR of (S,S)-3c

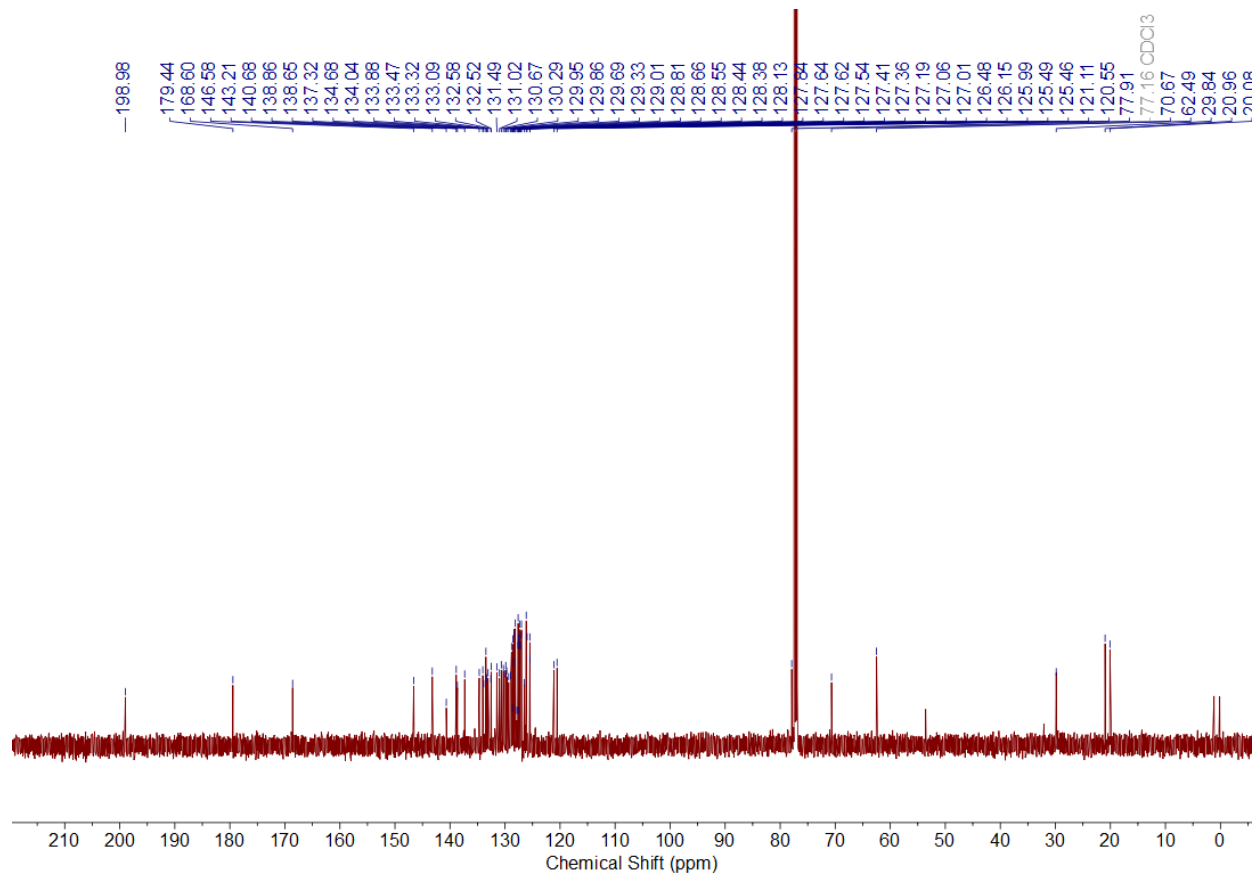

**<sup>1</sup>H NMR of (R,S)-3d**

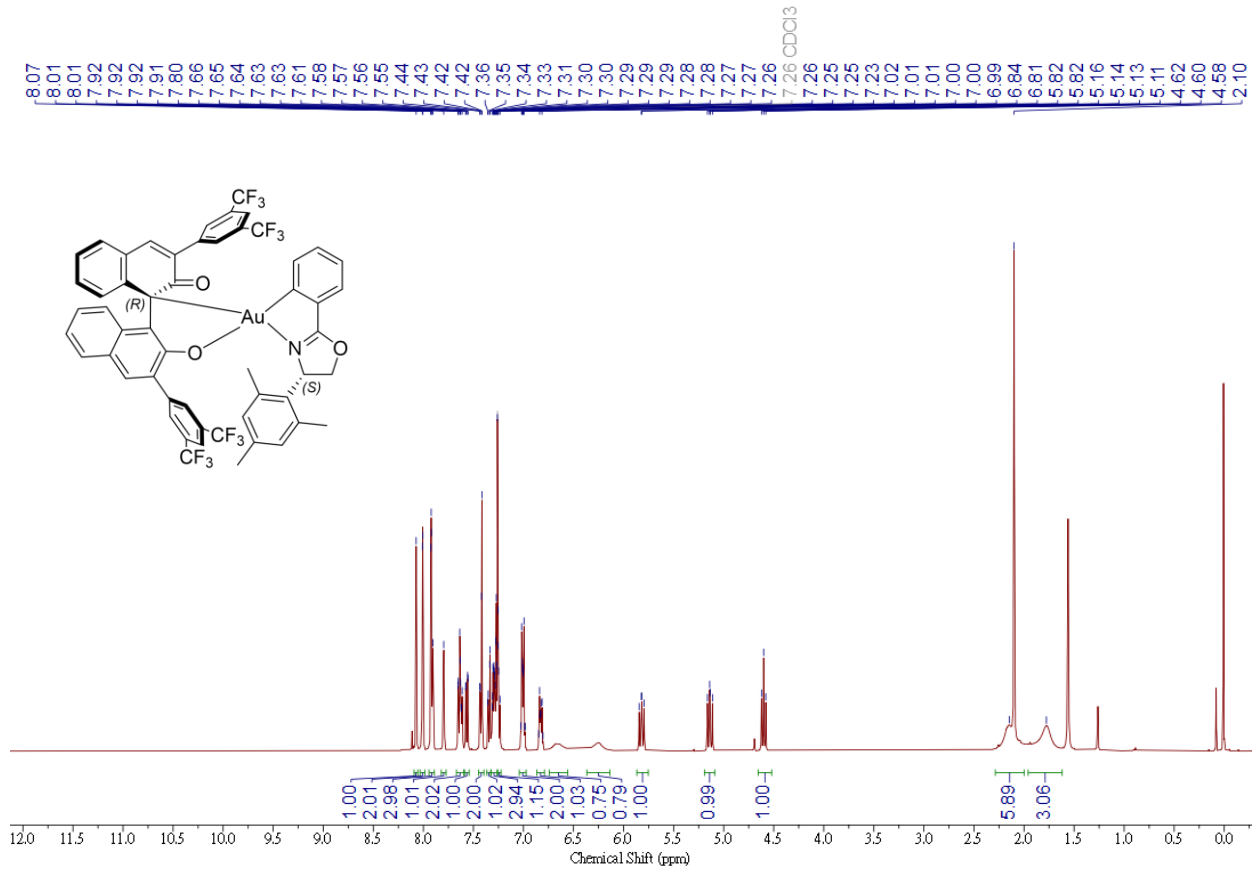

**<sup>13</sup>C NMR of (R,S)-3d**

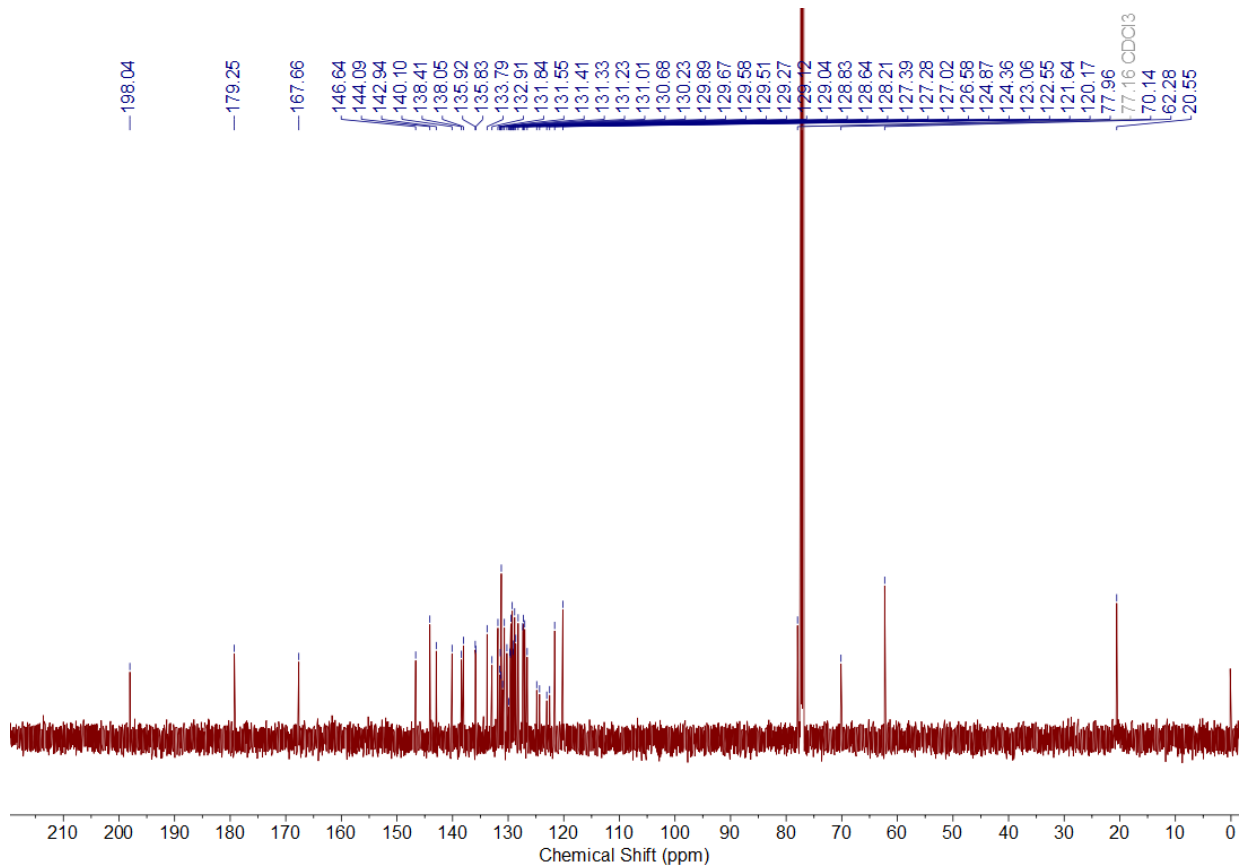

**<sup>1</sup>H NMR of (R,S)-3e**

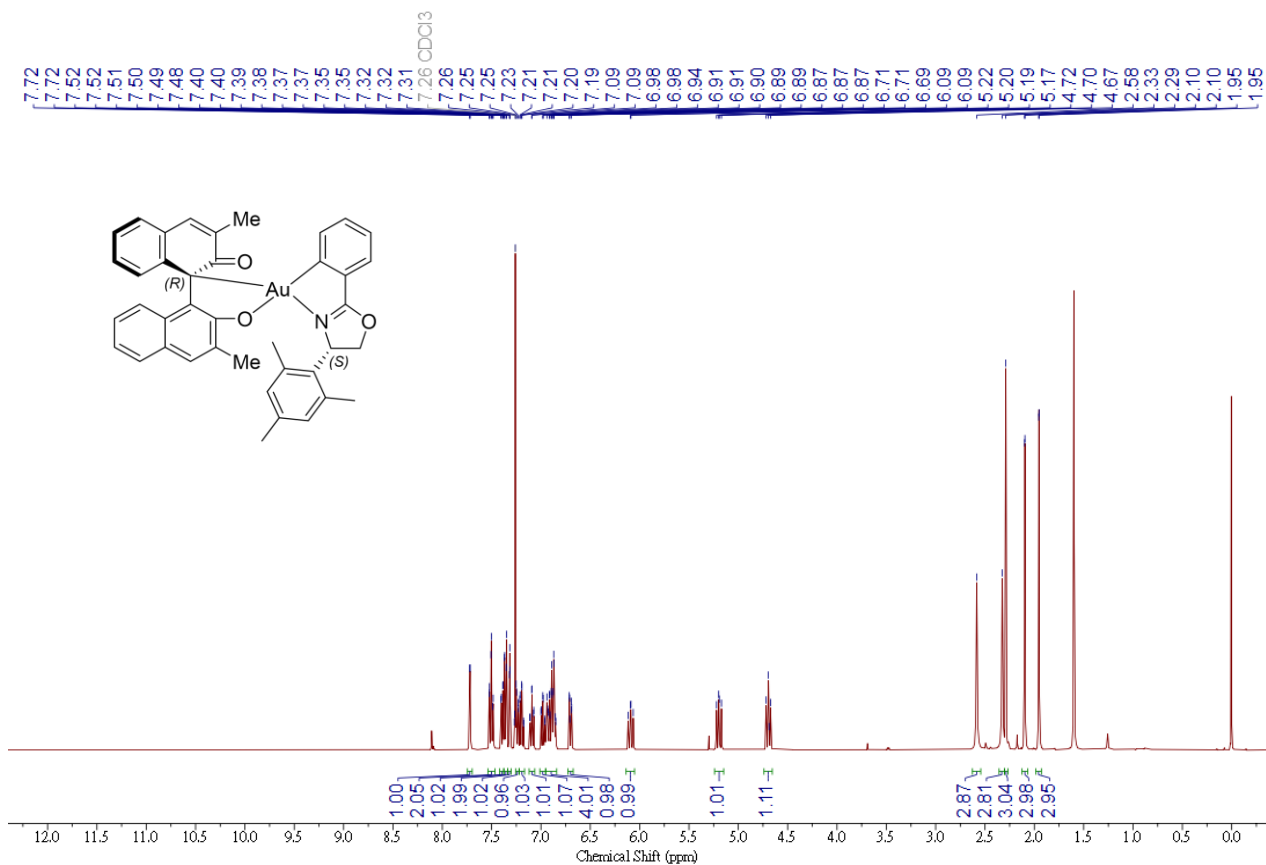

**<sup>13</sup>C NMR of (R,S)-3e**

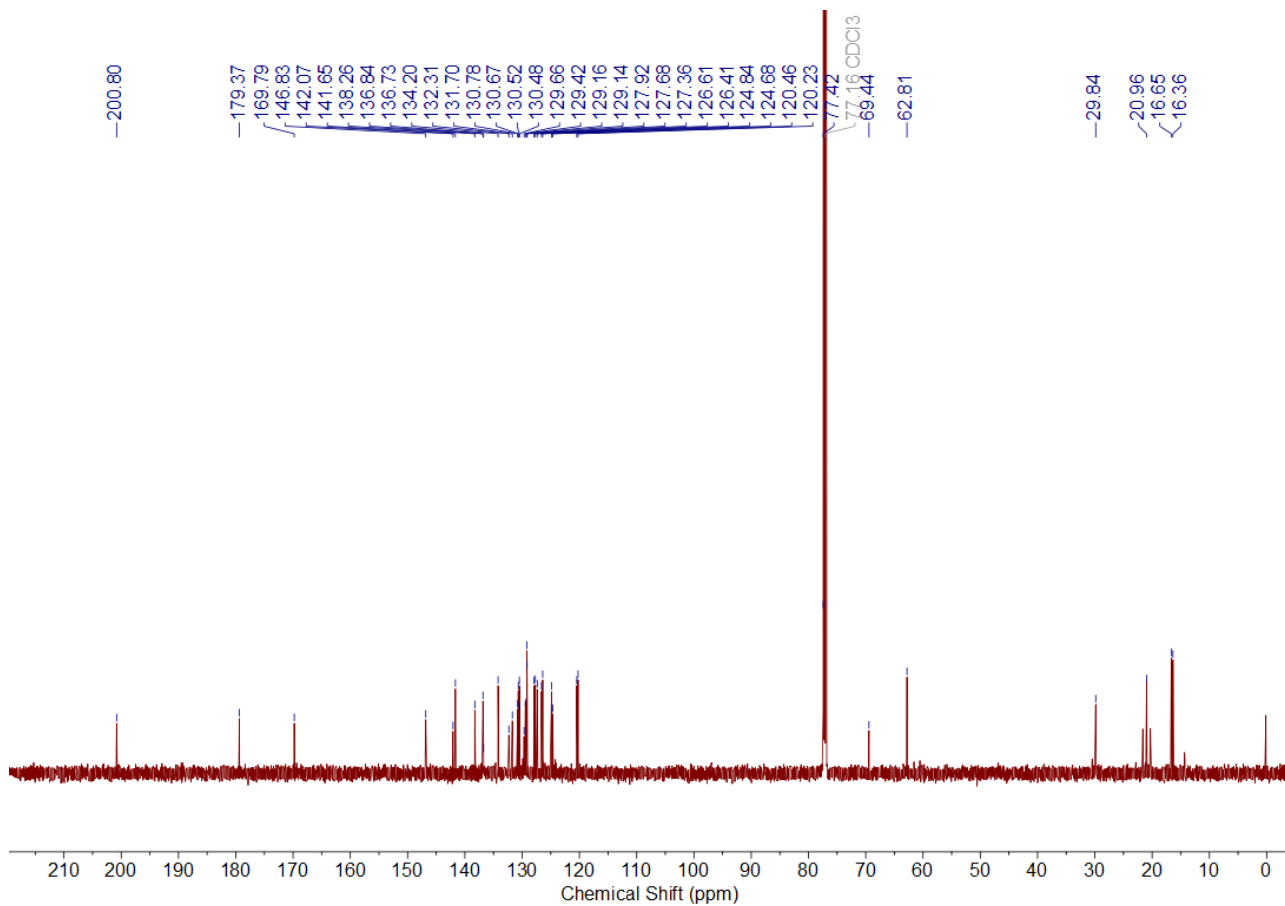

**<sup>1</sup>H NMR of (R,S)-3f**

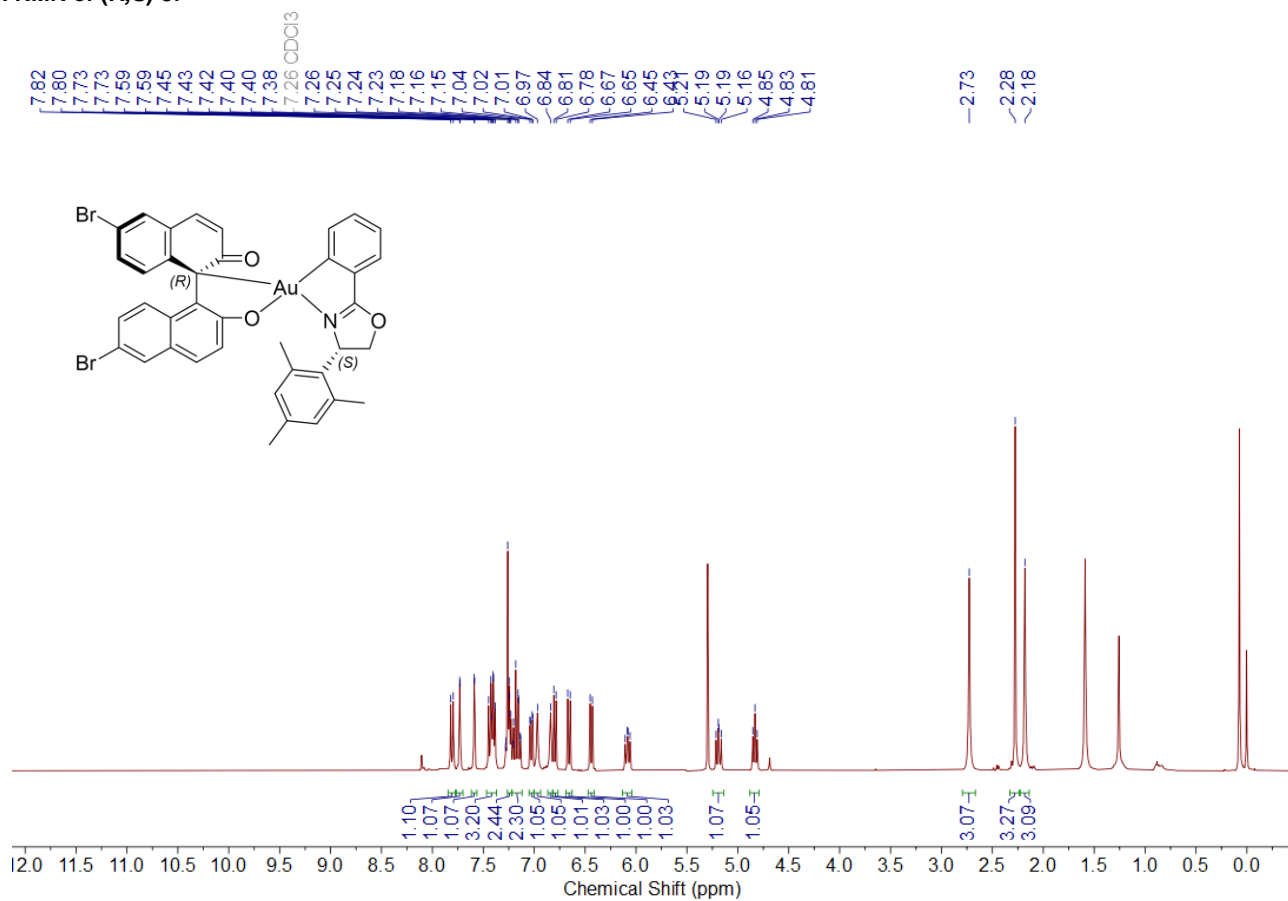

**<sup>13</sup>C NMR of (R,S)-3f**

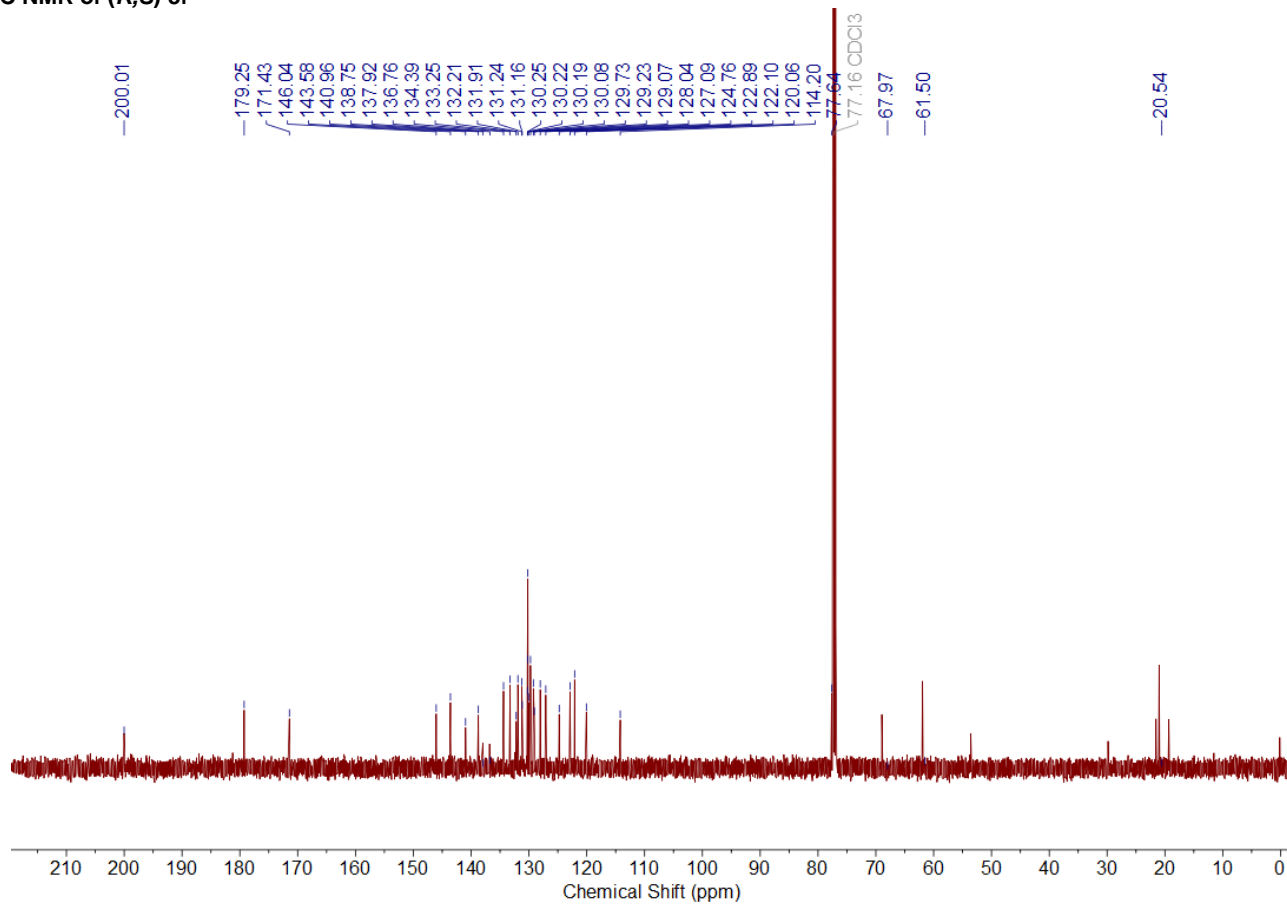

**<sup>1</sup>H NMR of (S,S)-3f**

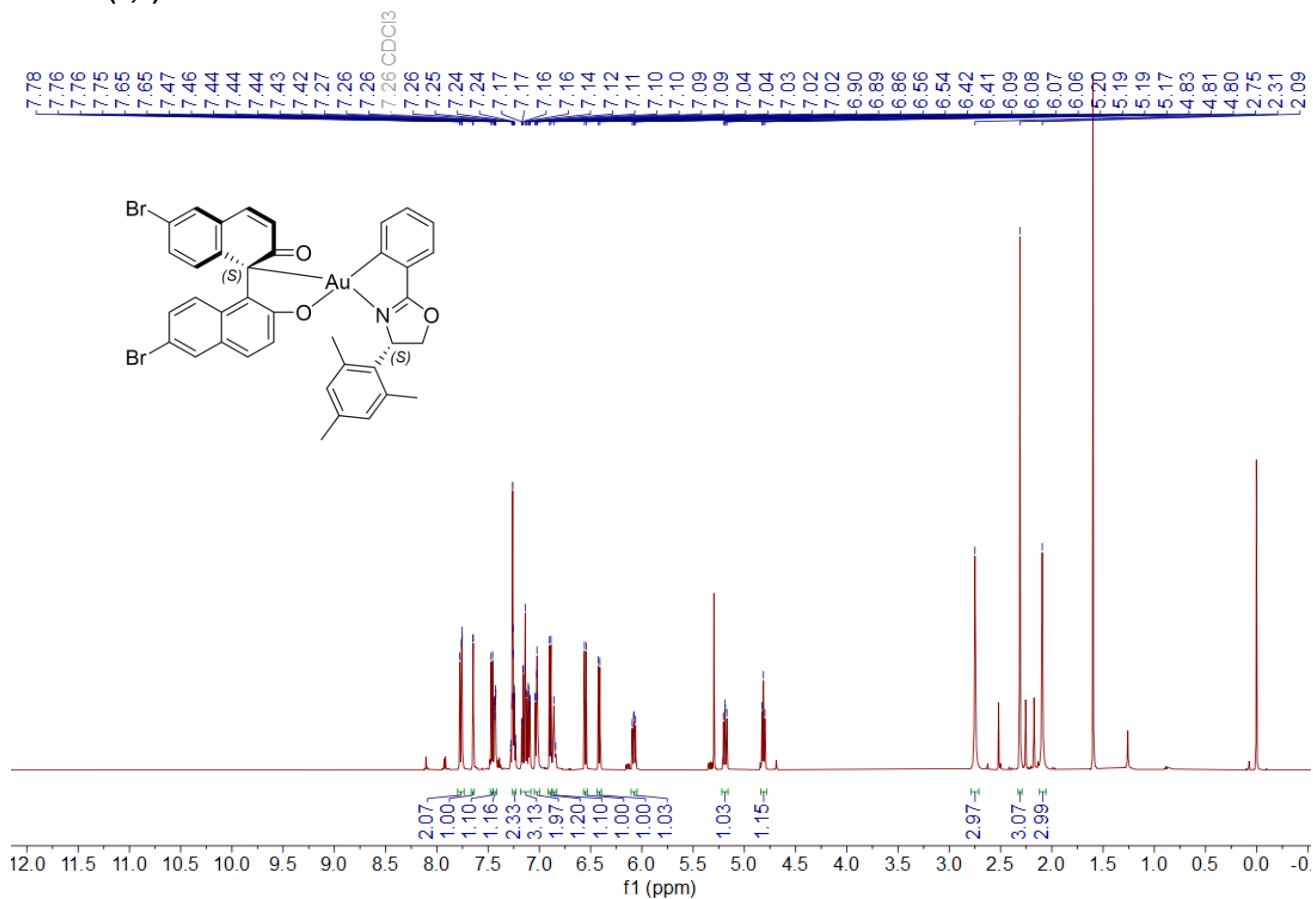

**<sup>13</sup>C NMR of (S,S)-3f**

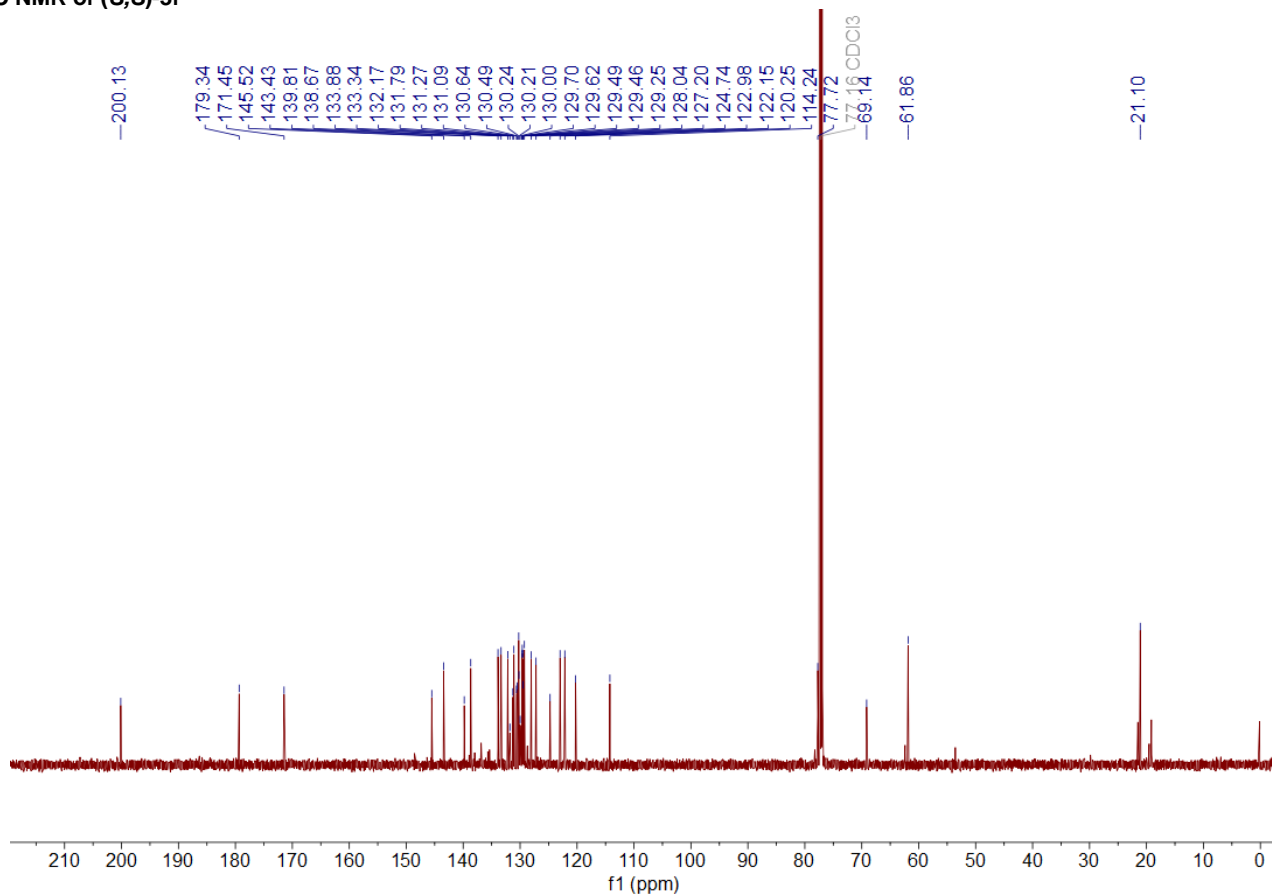

**<sup>1</sup>H NMR of (R,R)-3g**

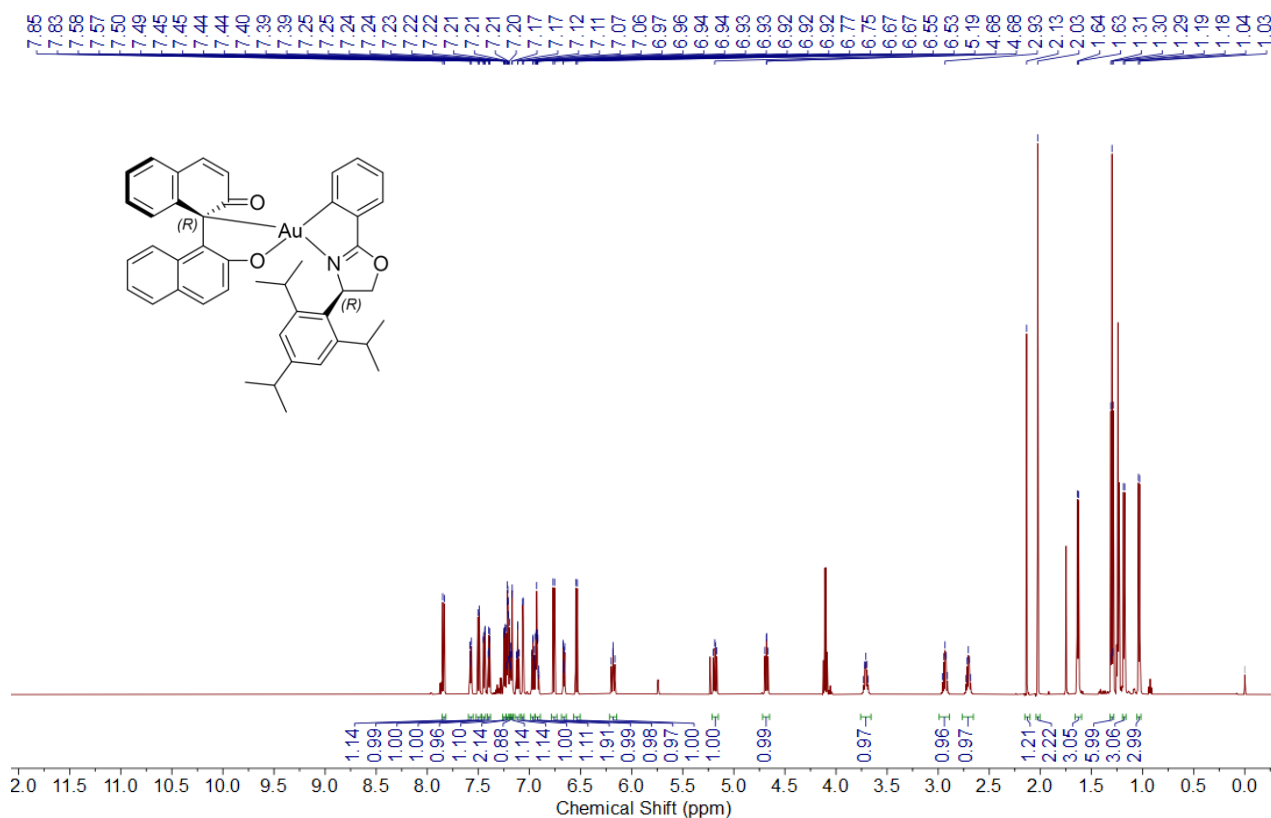

**<sup>13</sup>C NMR of (R,R)-3g**

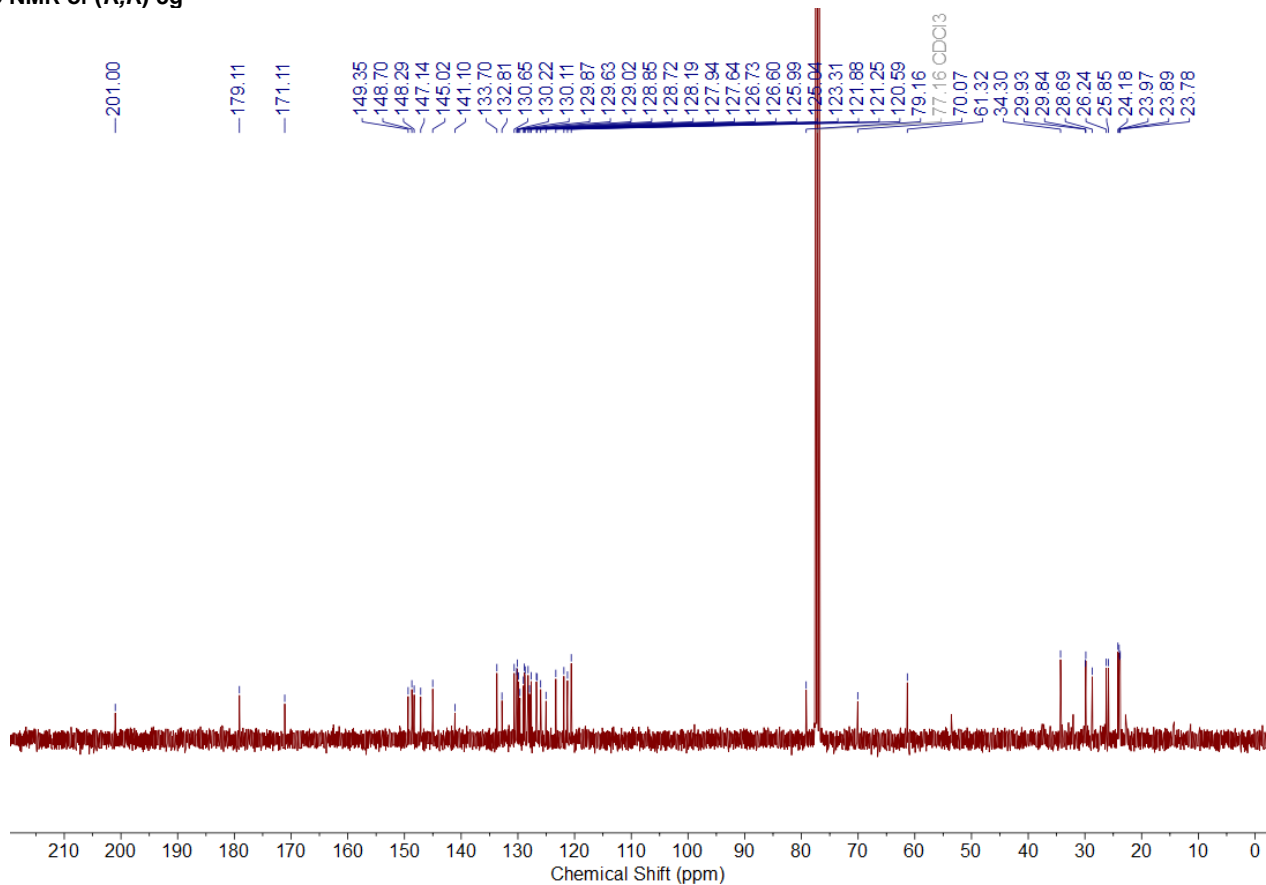

### <sup>1</sup>H NMR of (R,S)-3h

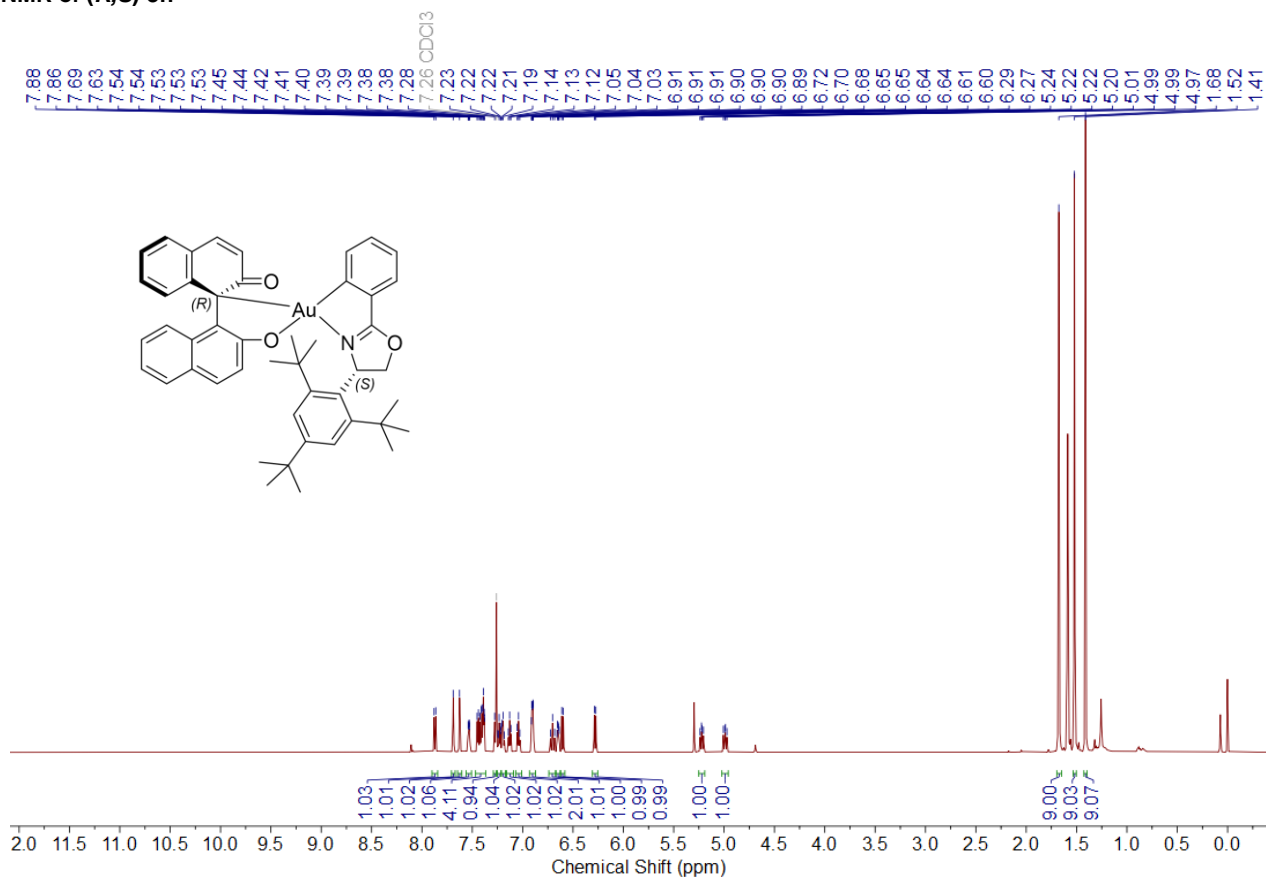

### <sup>13</sup>C NMR of (R,S)-3h

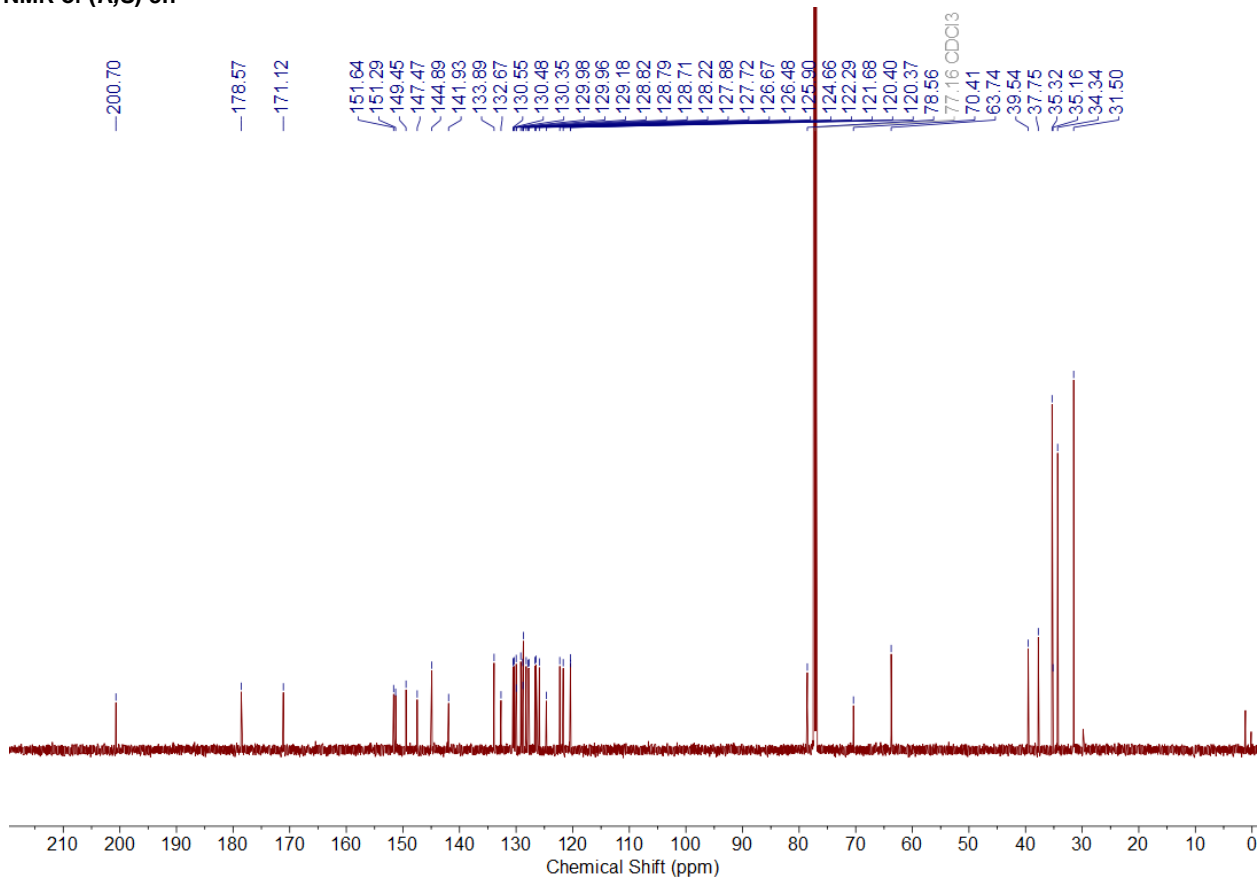

**<sup>1</sup>H NMR of (R,R)-3j**

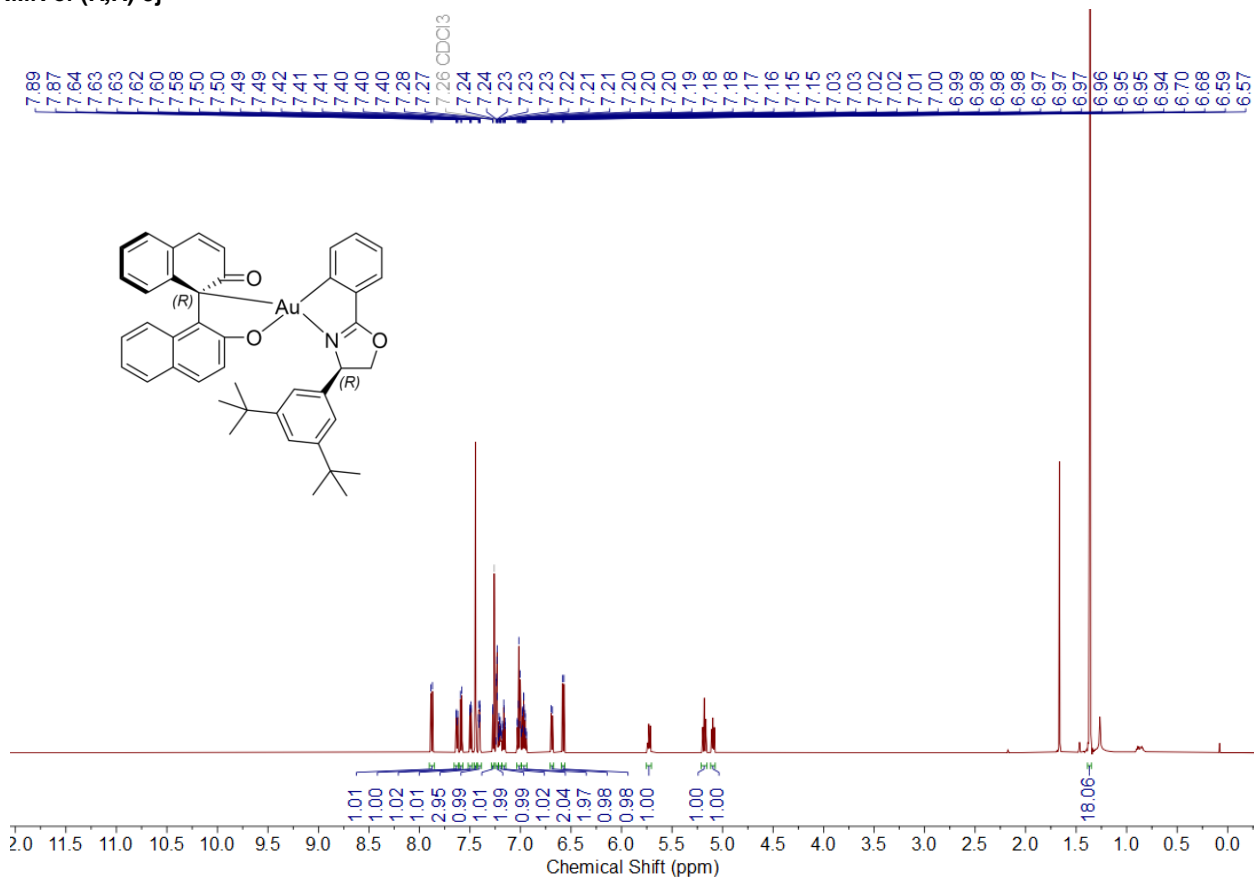

**<sup>13</sup>C NMR of (R,R)-3j**

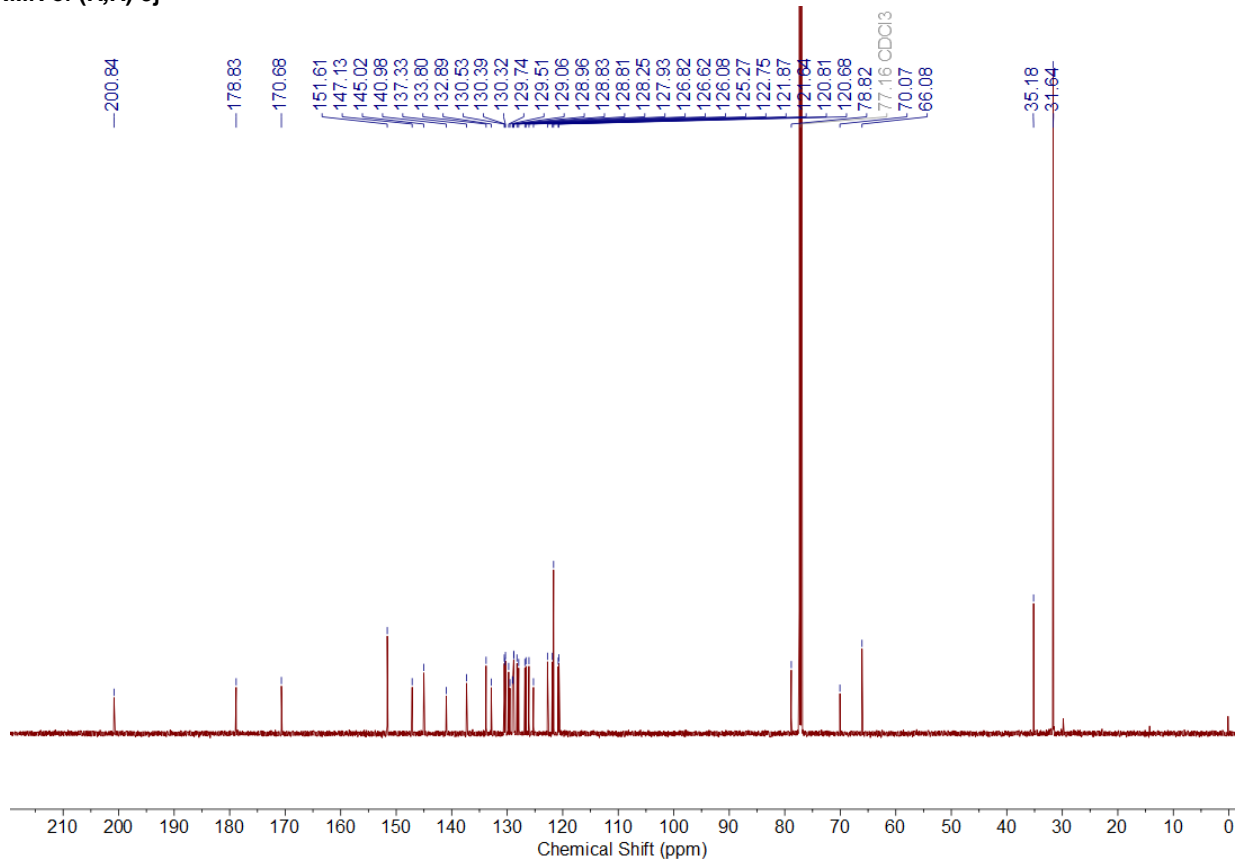



### <sup>1</sup>H NMR of 4f

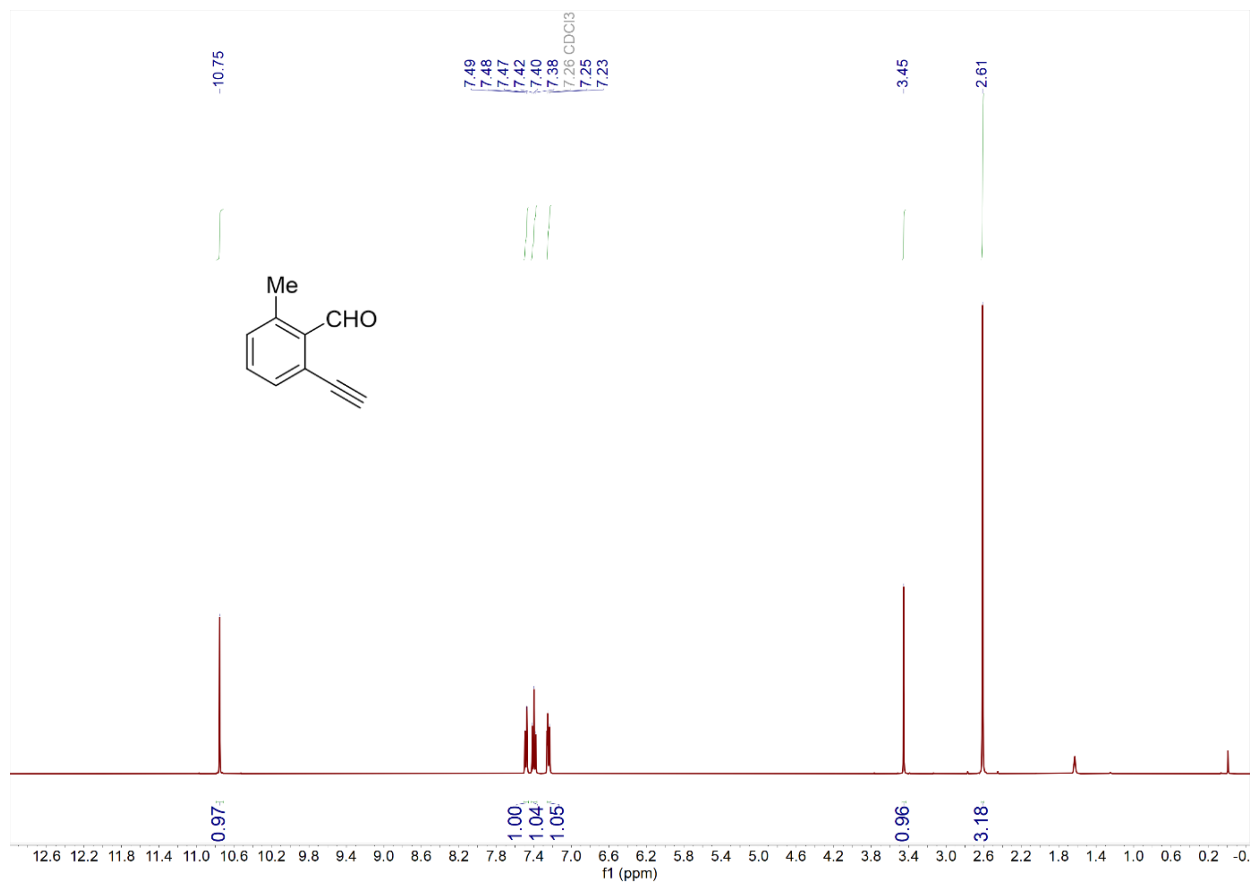

### <sup>13</sup>C NMR of 4f

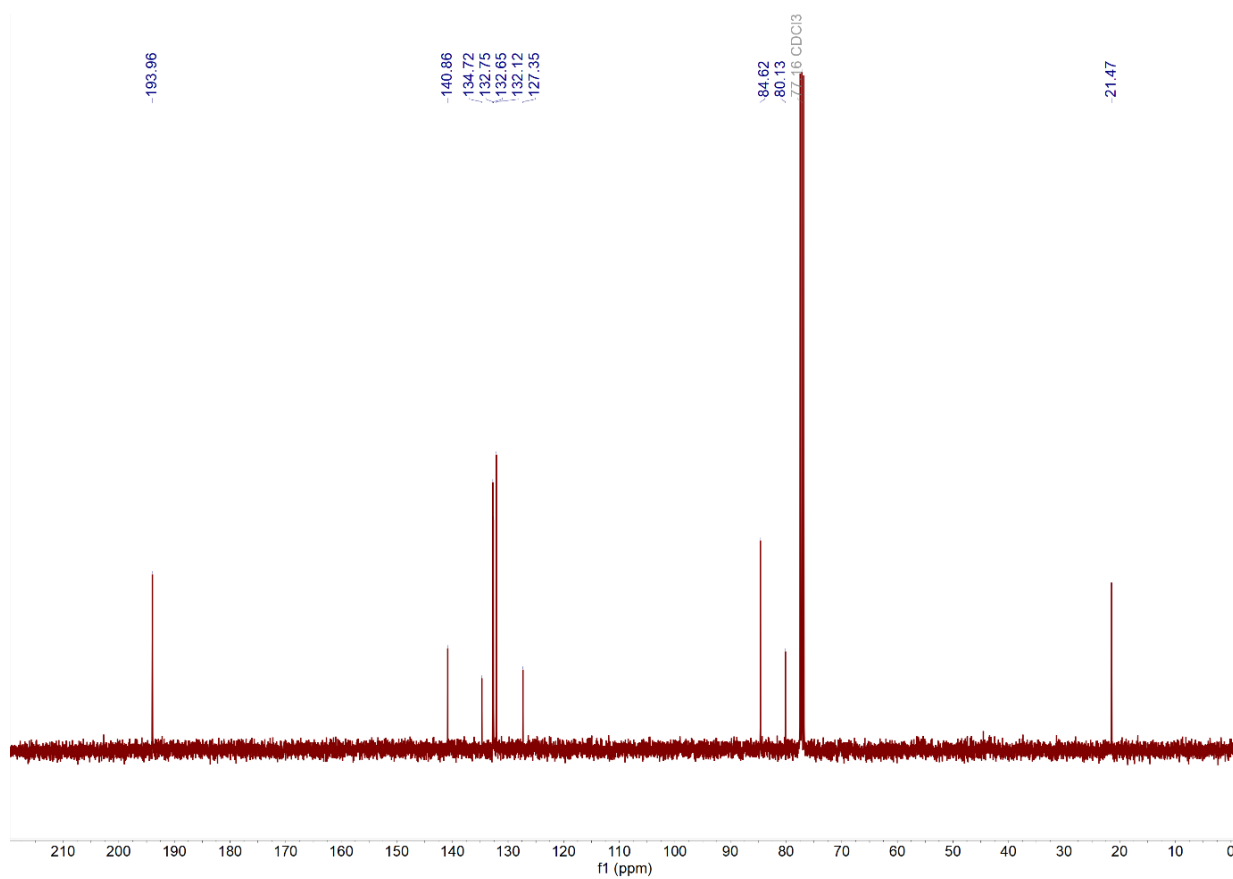

### <sup>1</sup>H NMR of 5a

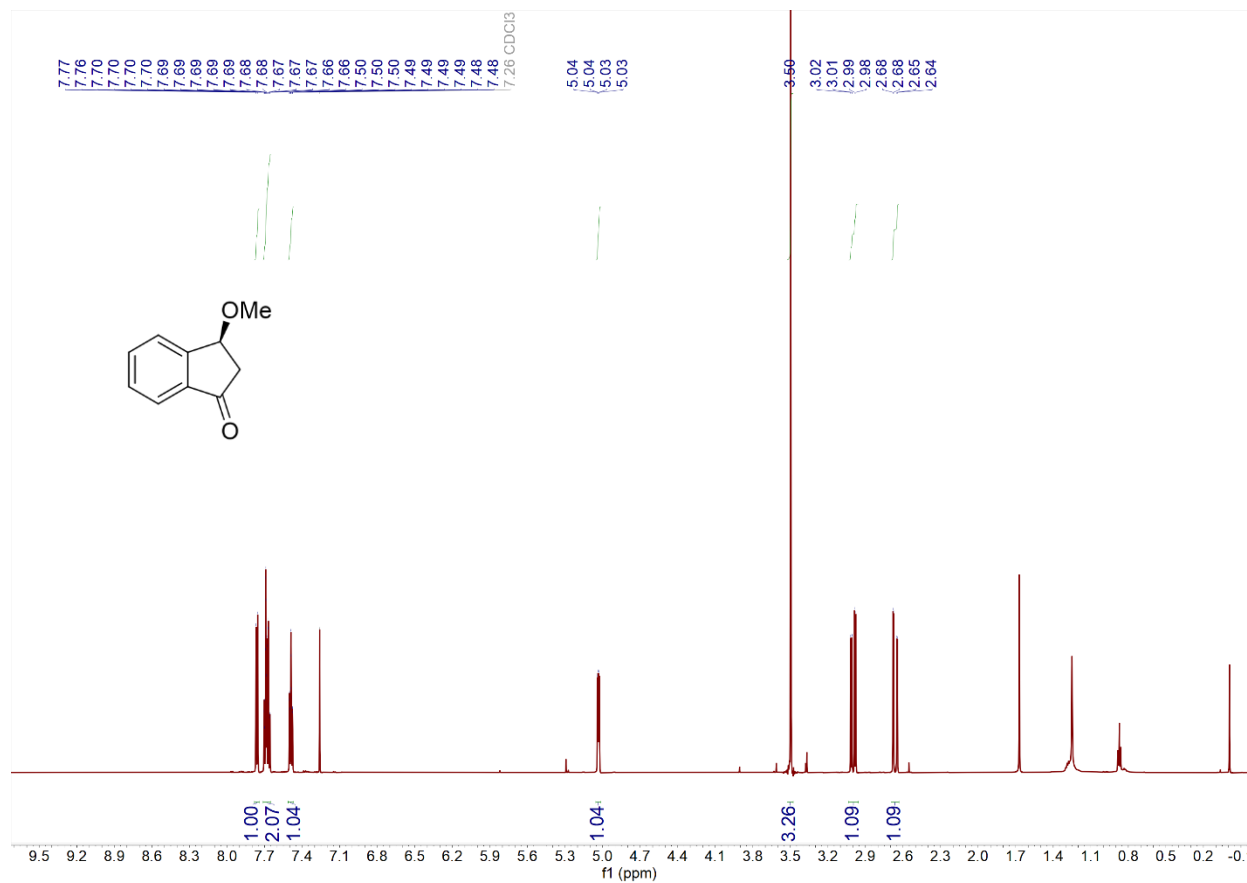

### <sup>1</sup>H NMR of 5b

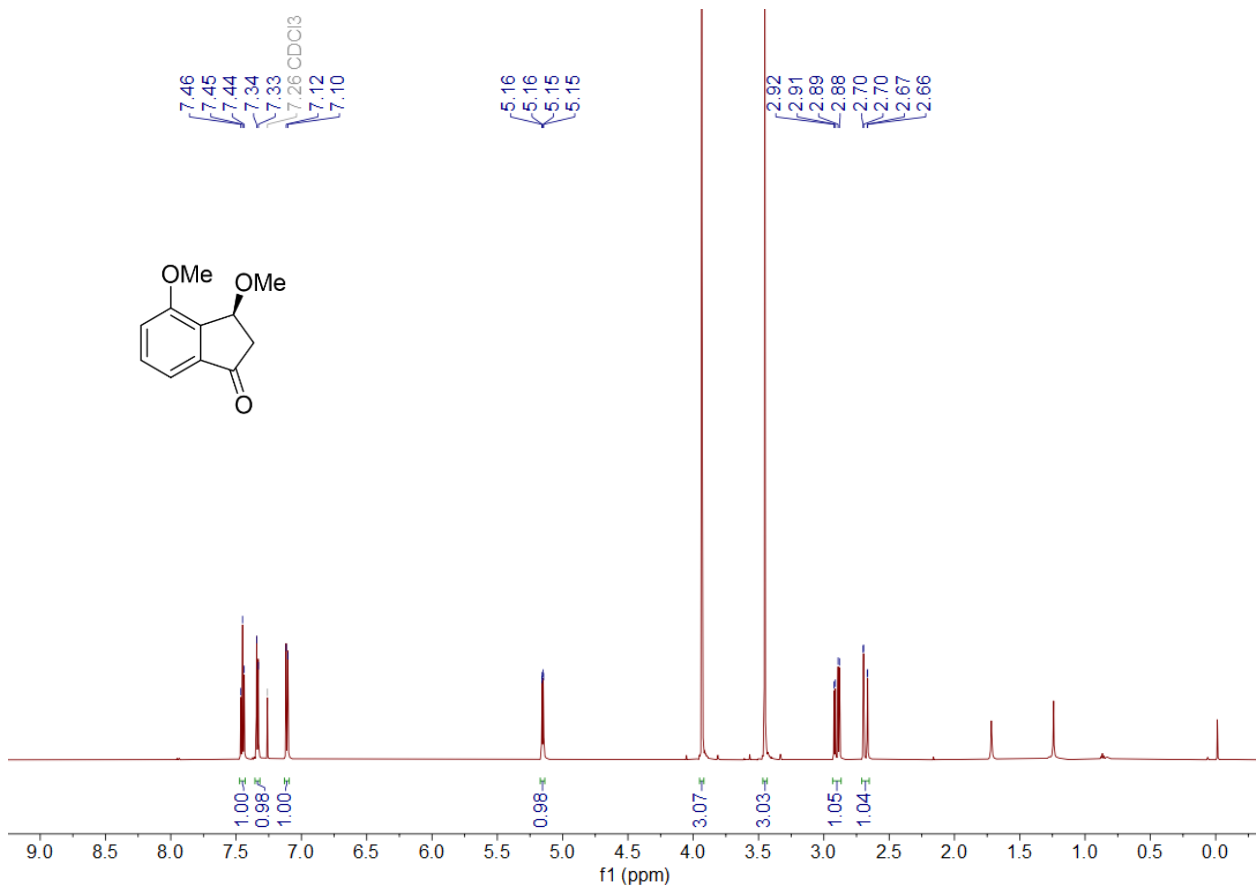

<sup>13</sup>C NMR of 5b

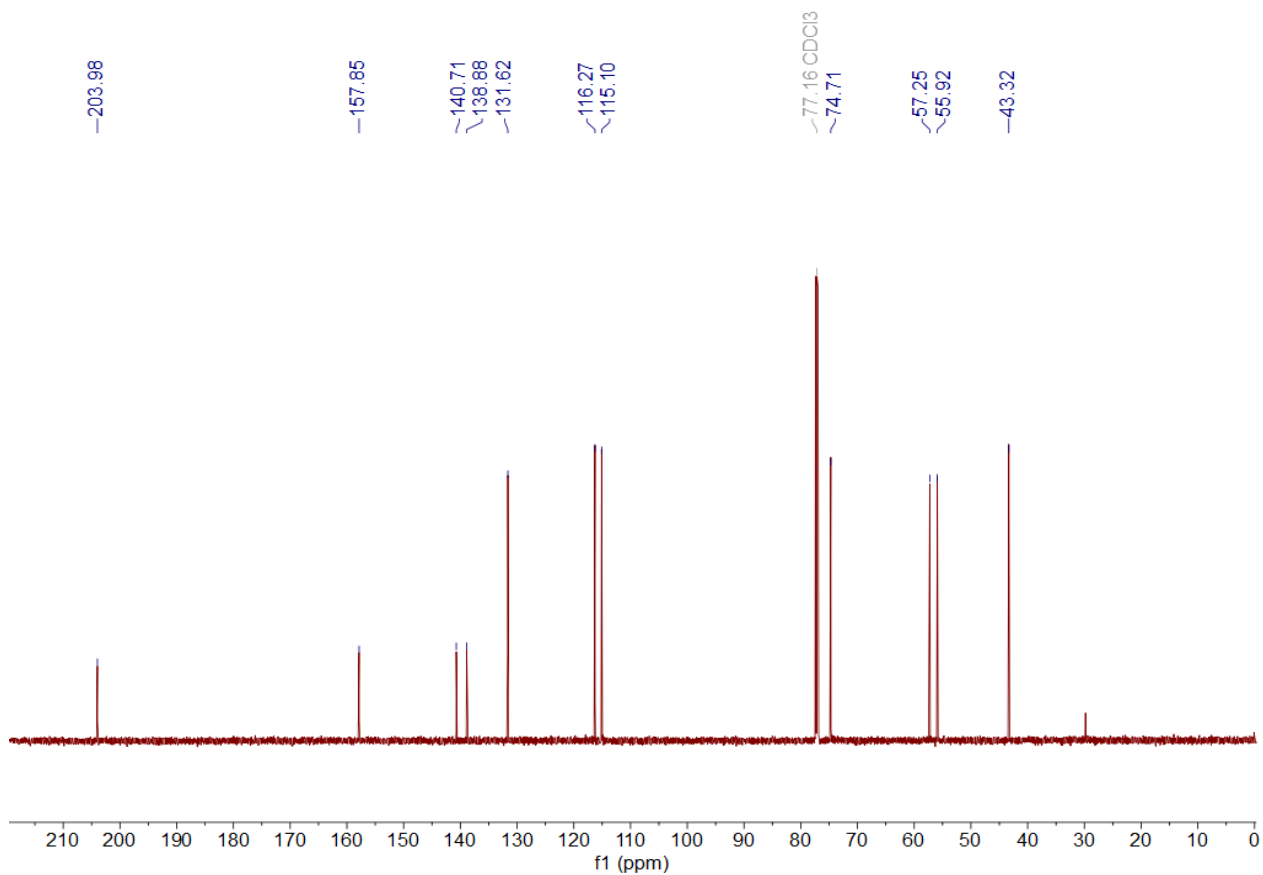

<sup>1</sup>H NMR of 5c

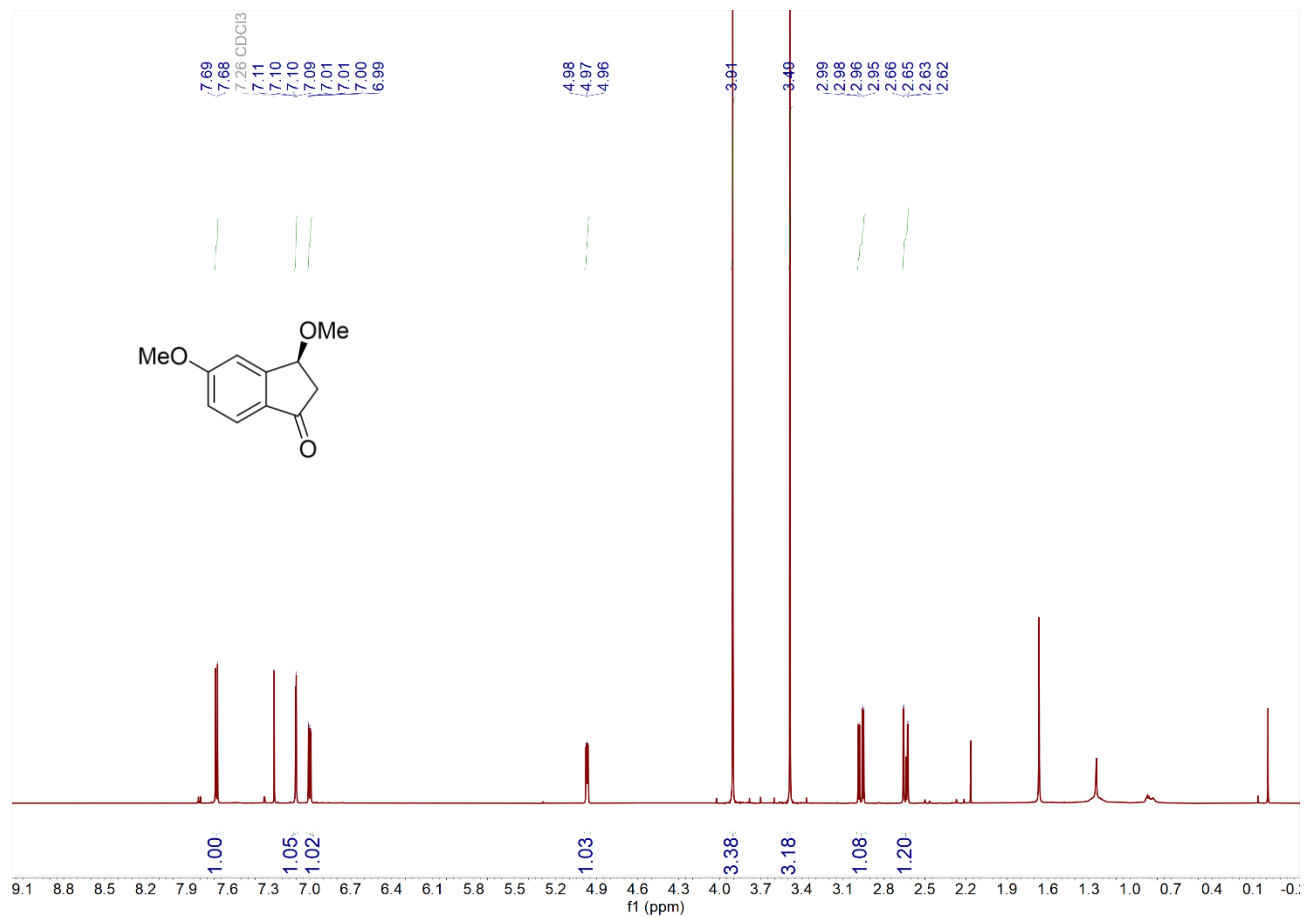

### <sup>1</sup>H NMR of 5d

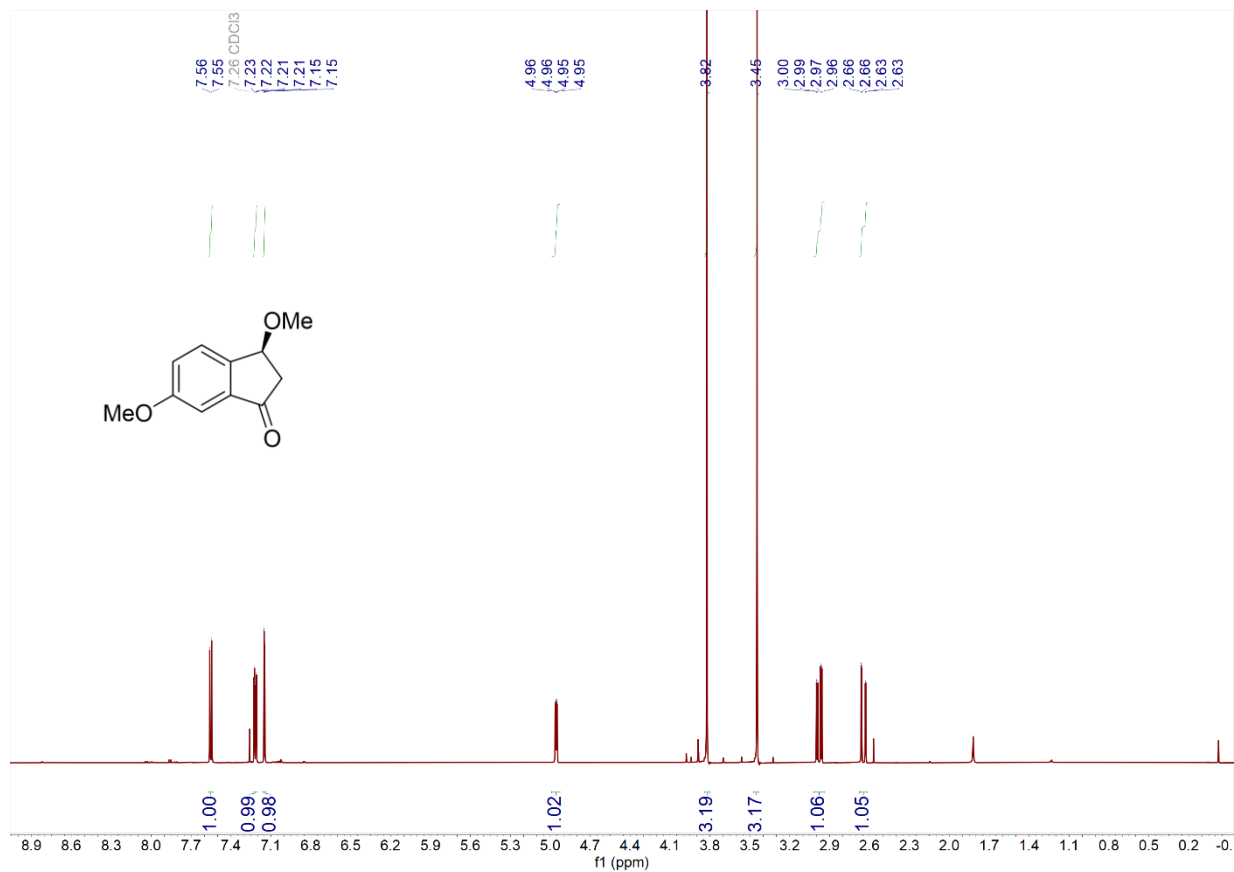

### <sup>13</sup>C NMR of 5d

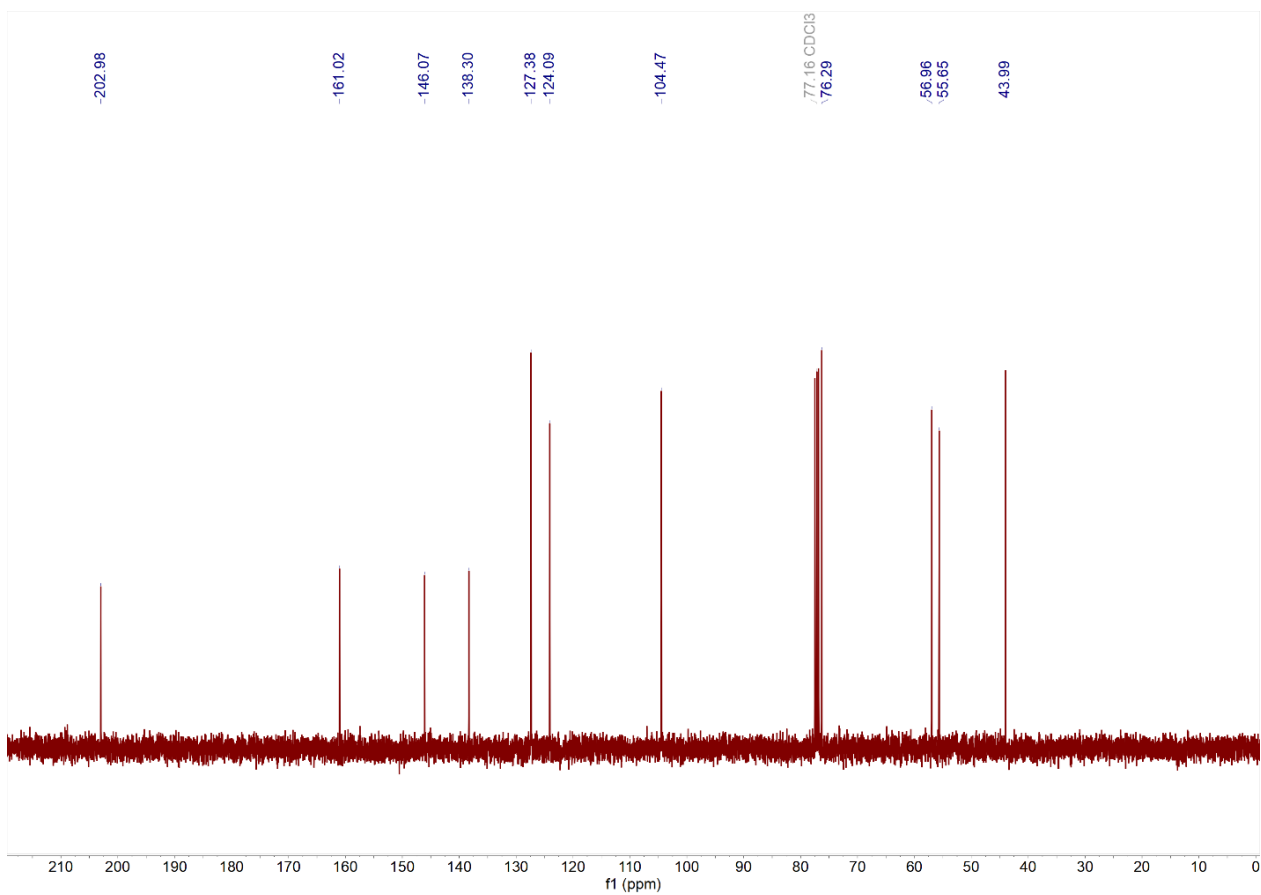

### <sup>1</sup>H NMR of 5e

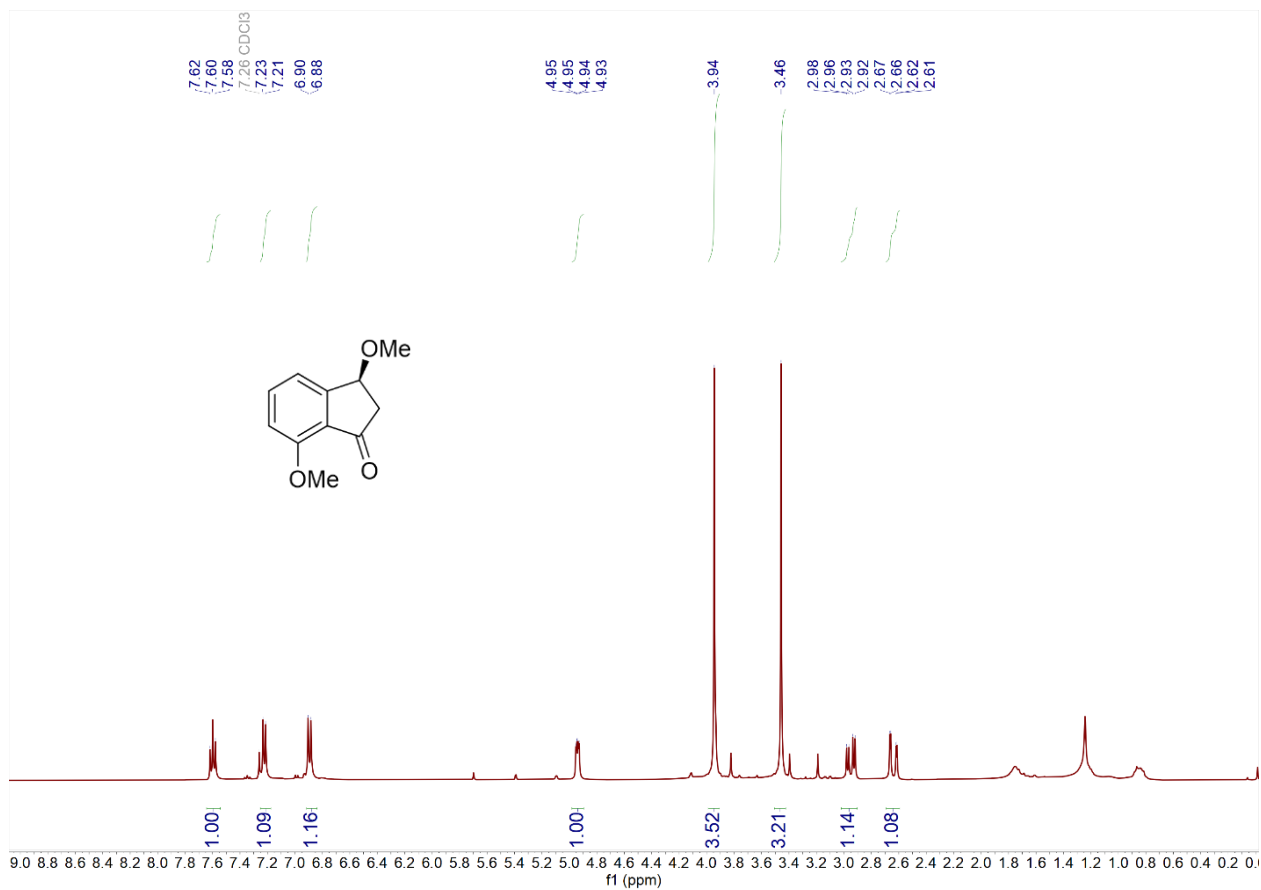

### <sup>13</sup>C NMR of 5e

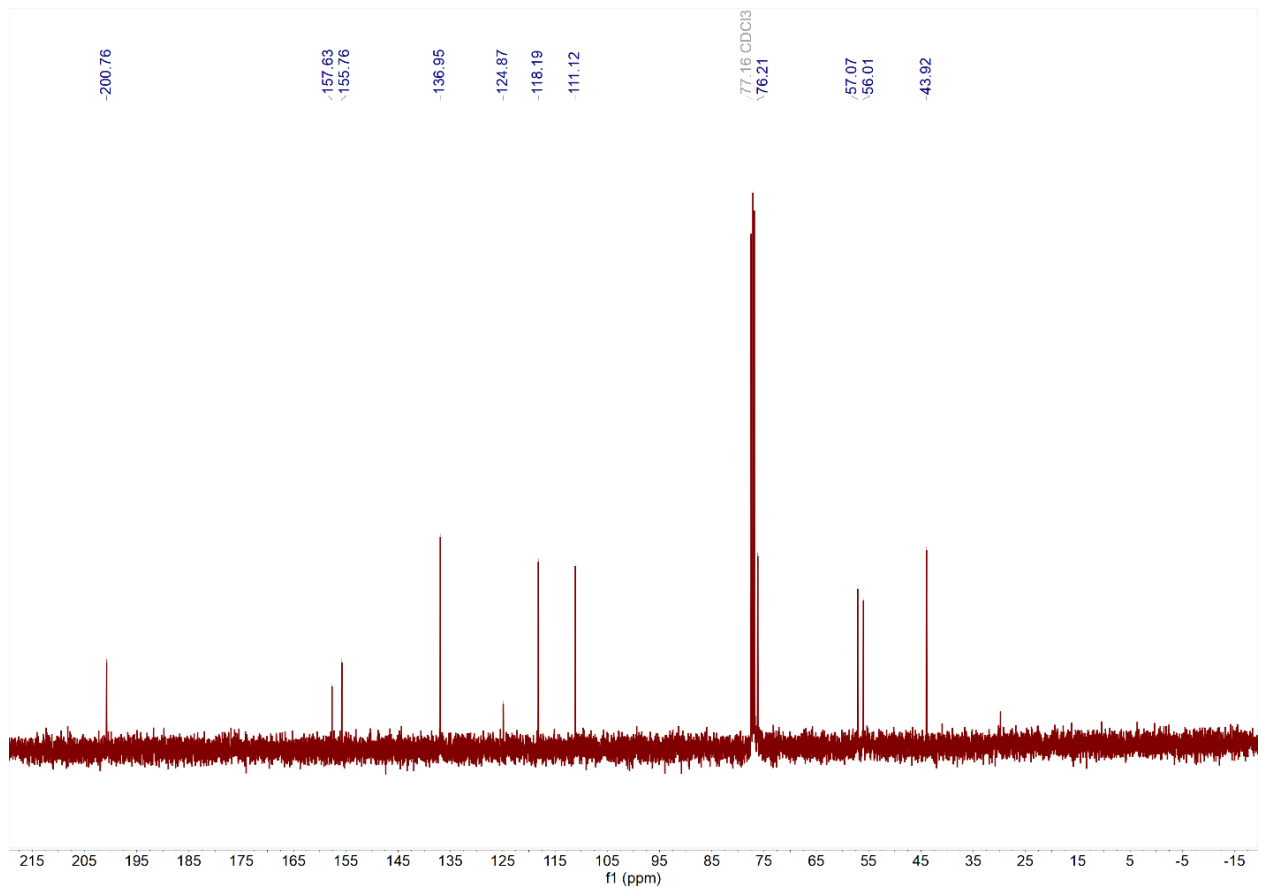

**<sup>1</sup>H NMR of 5f**

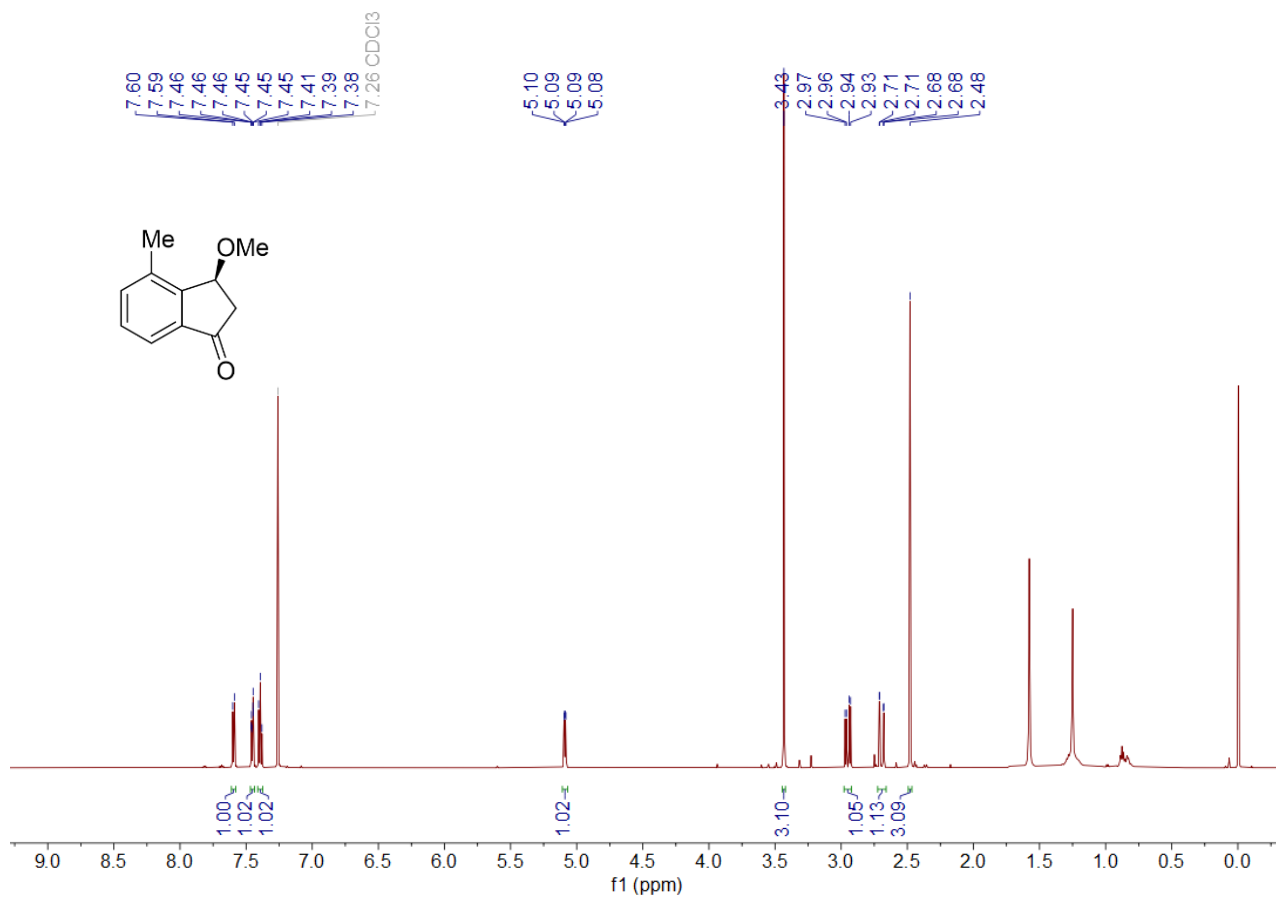

**<sup>13</sup>C NMR of 5f**

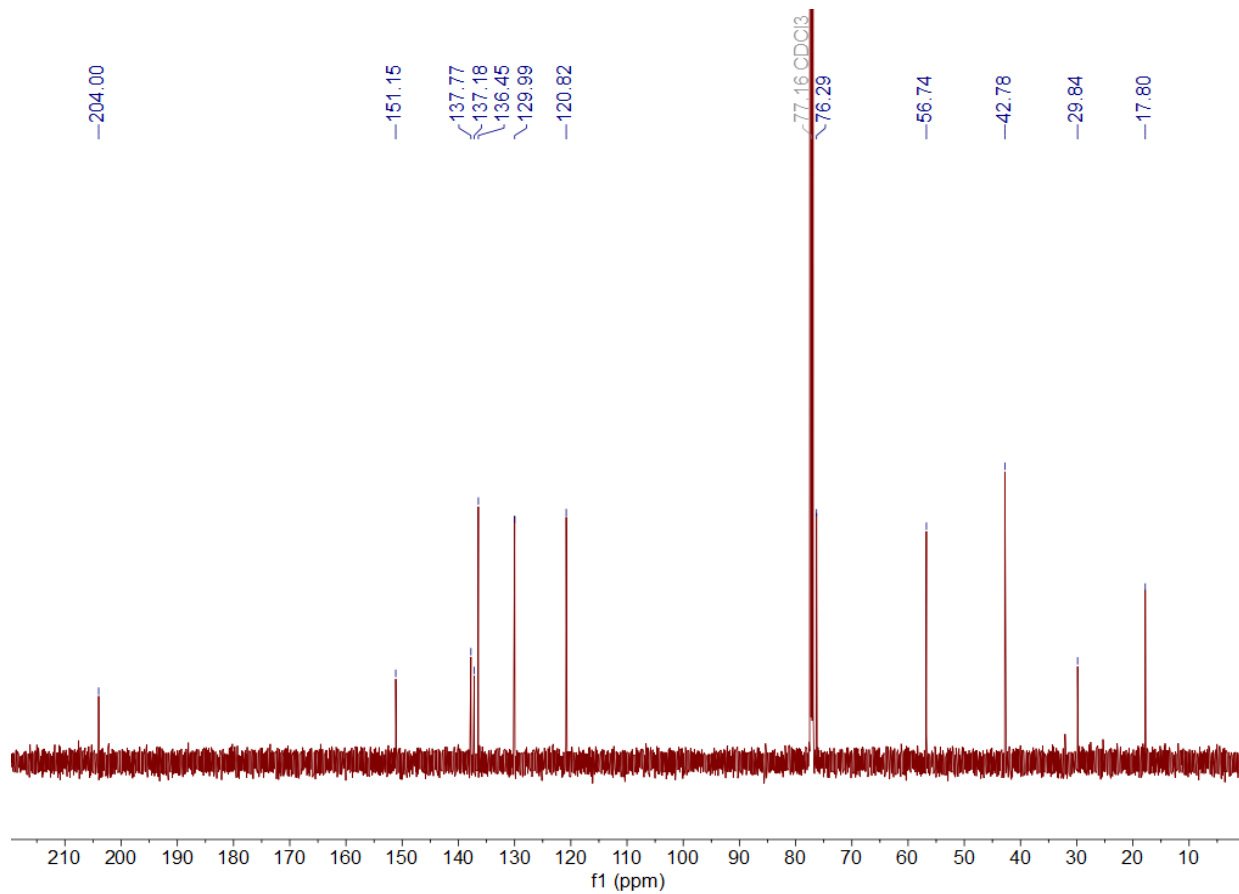

### <sup>1</sup>H NMR of 5g

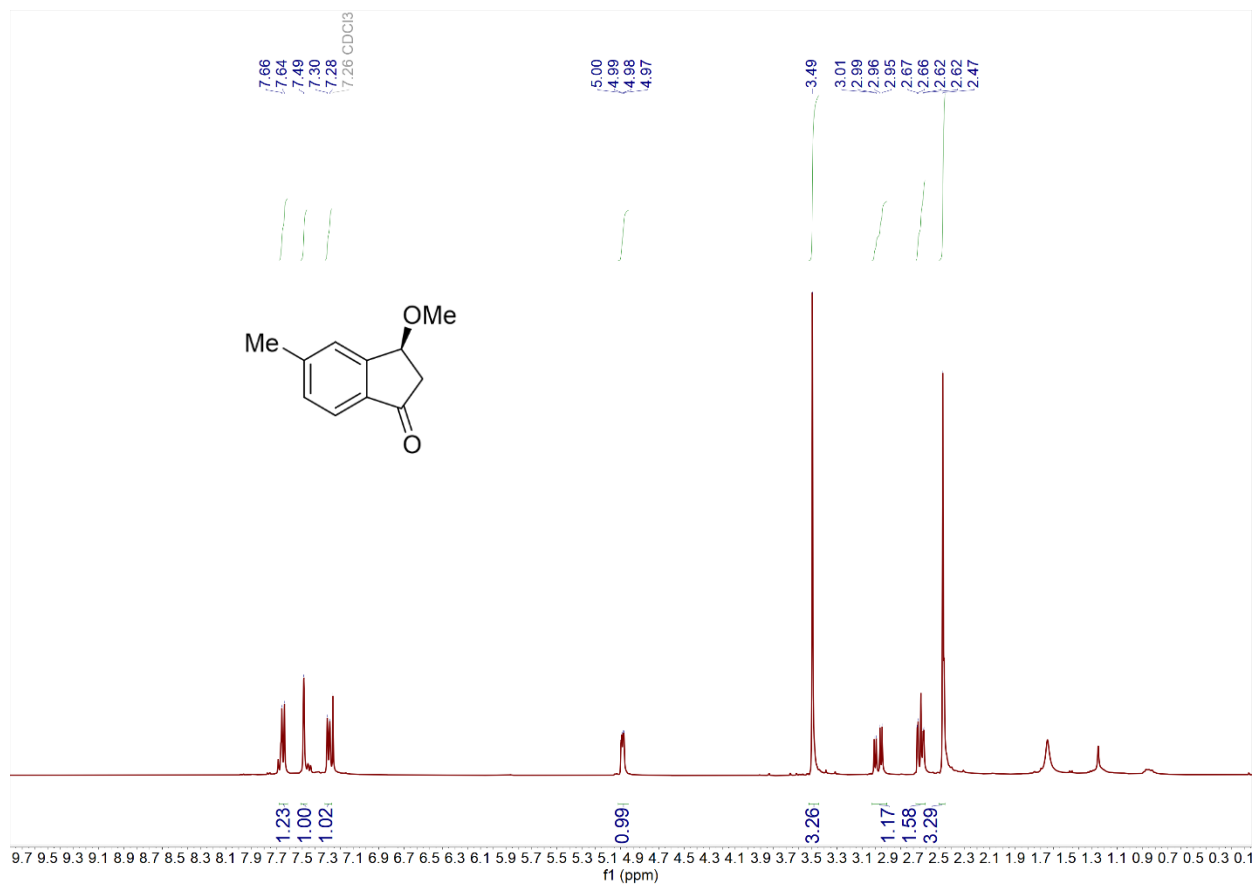

### <sup>1</sup>H NMR of 5h

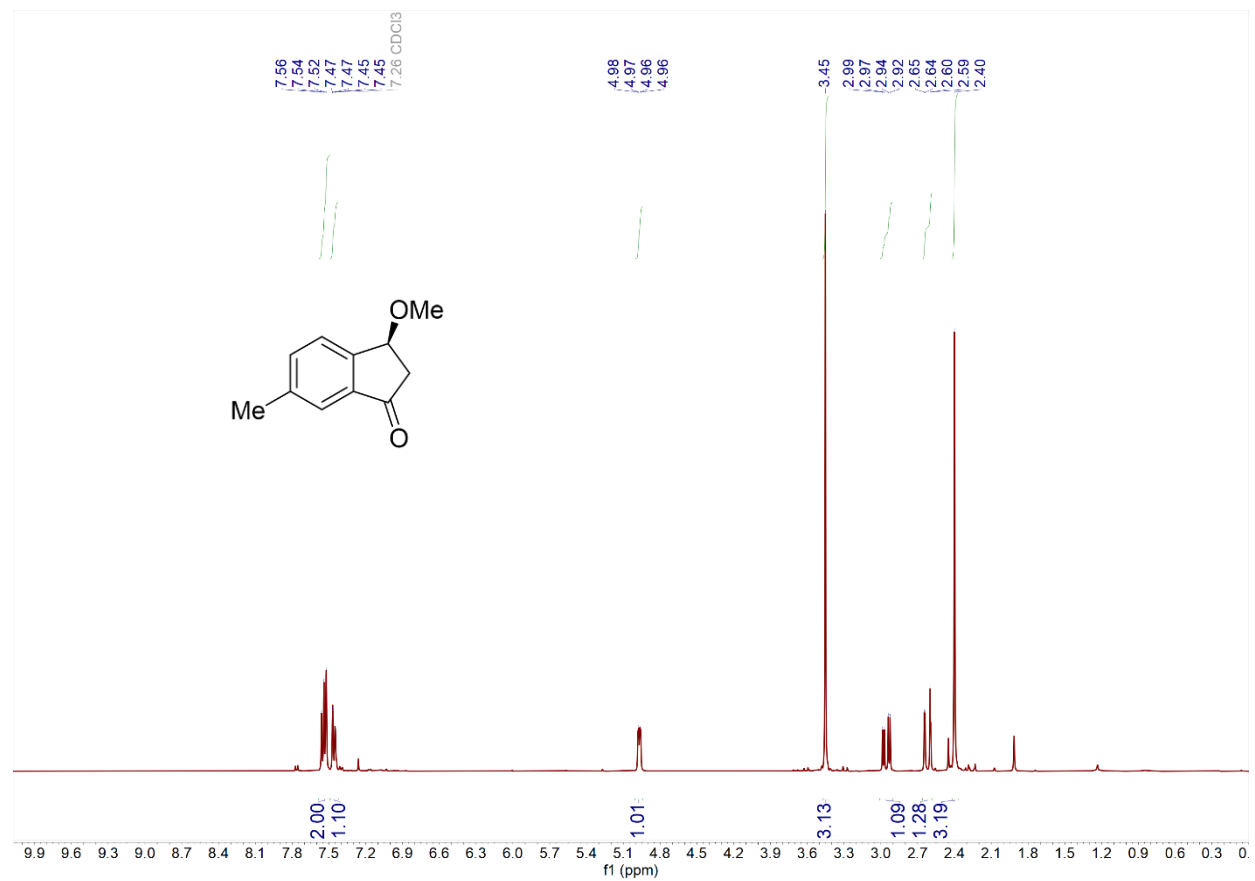

### <sup>1</sup>H NMR of 5i

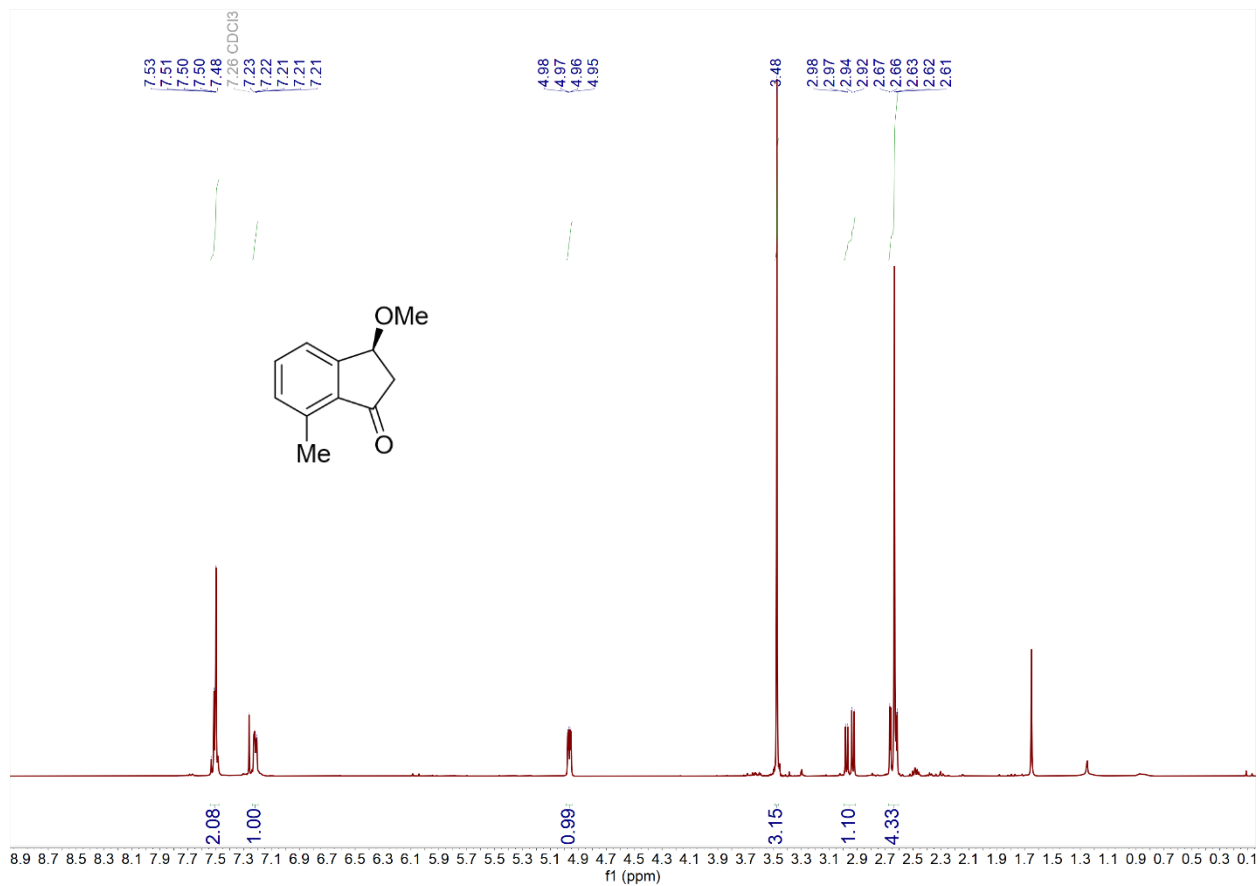

### <sup>13</sup>C NMR of 5i

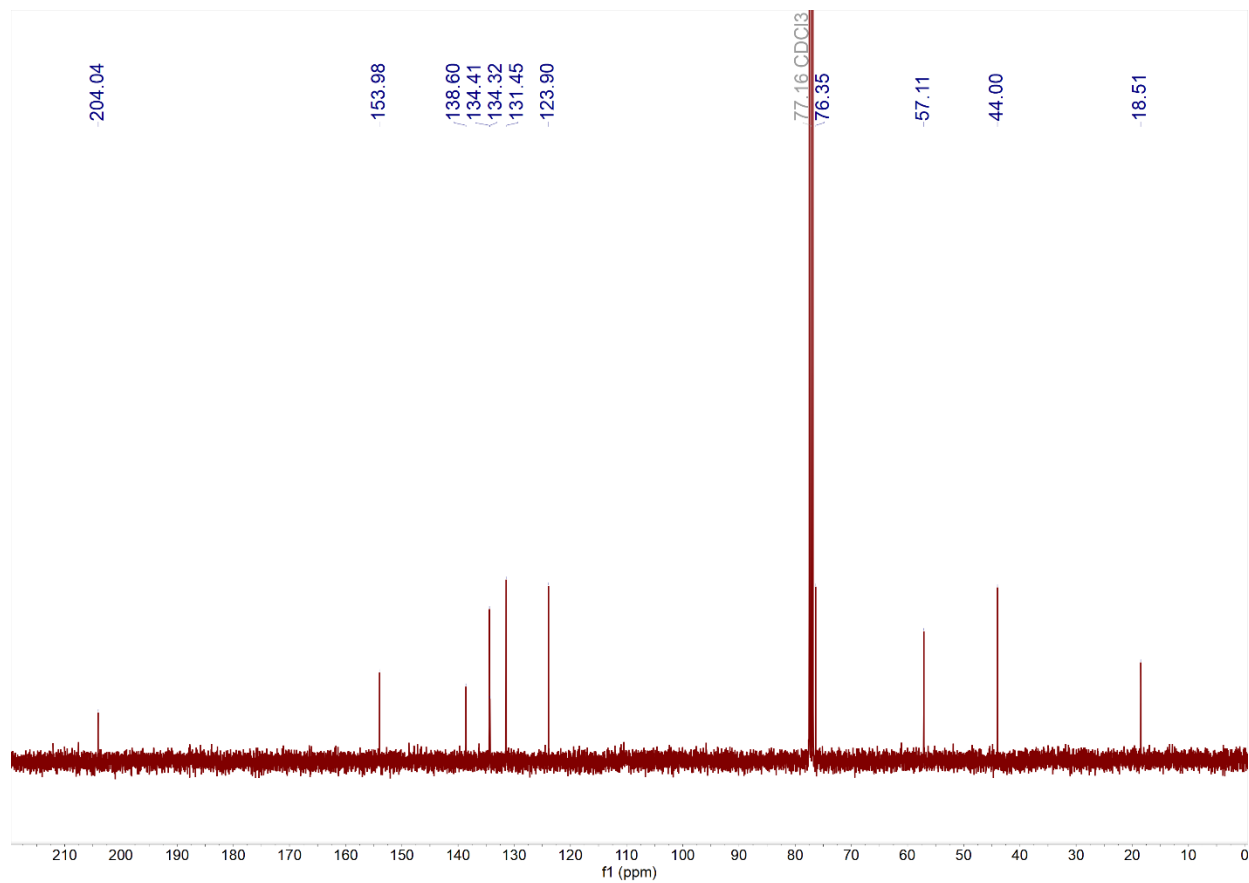



### <sup>1</sup>H NMR of 5j

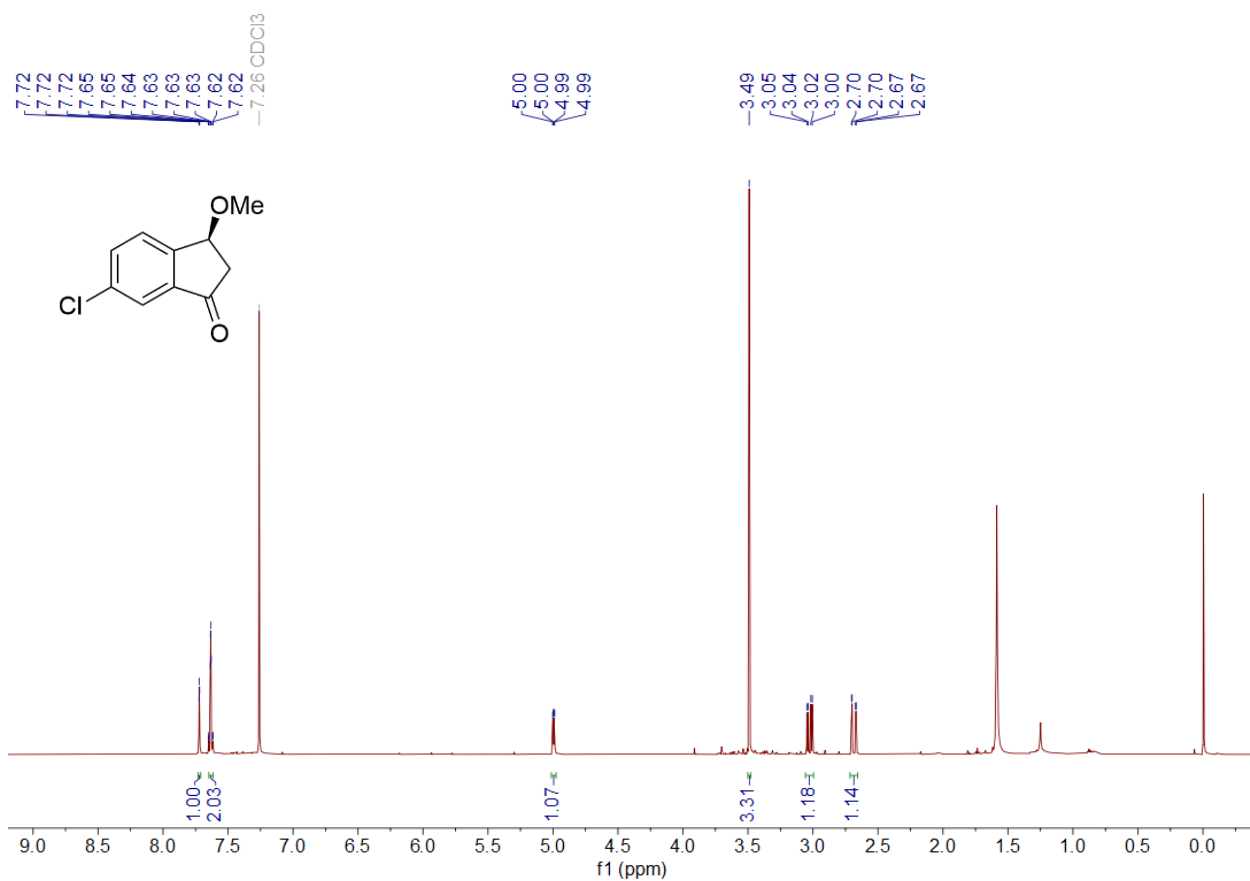

### <sup>13</sup>C NMR of 5j

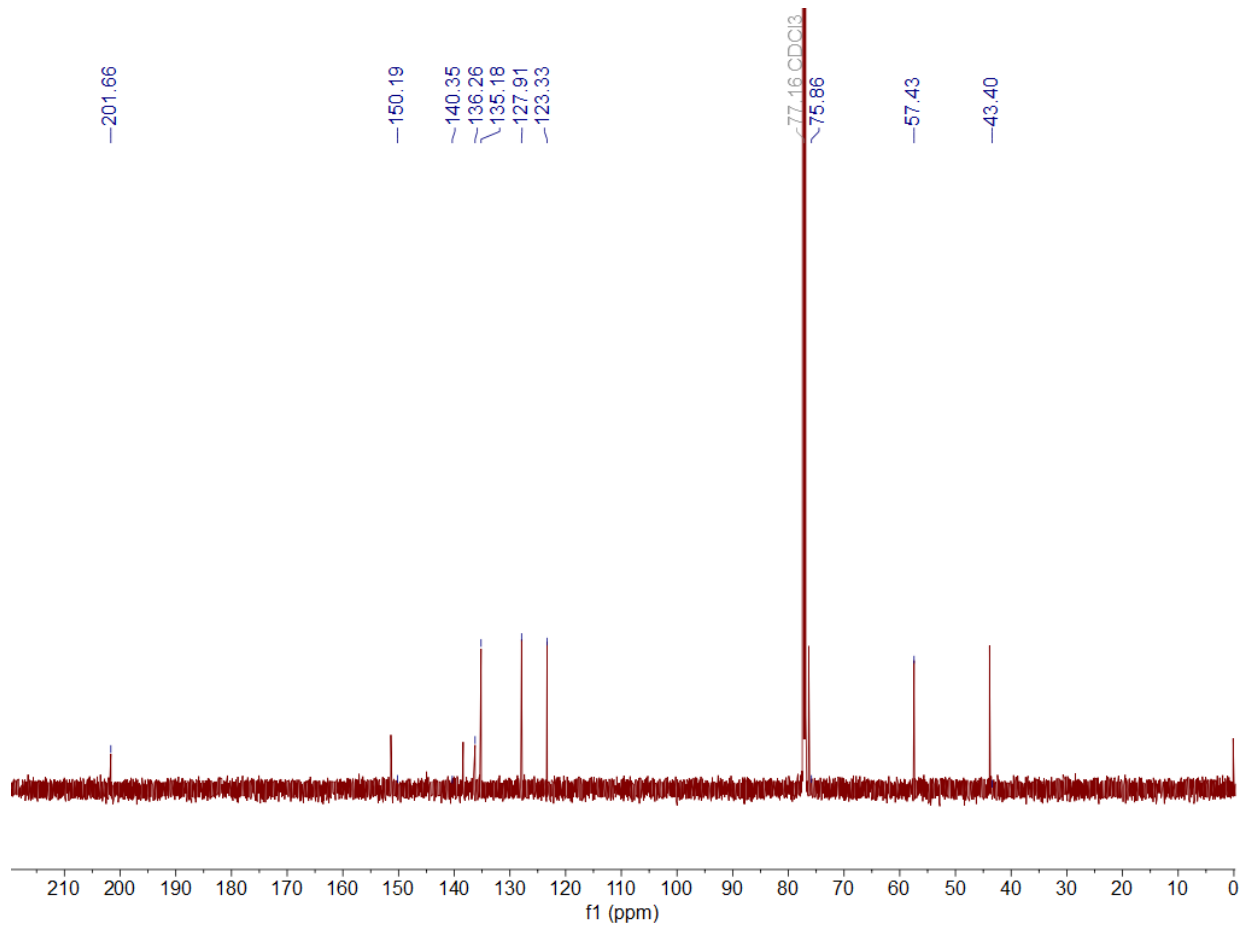

### <sup>1</sup>H NMR of 5l

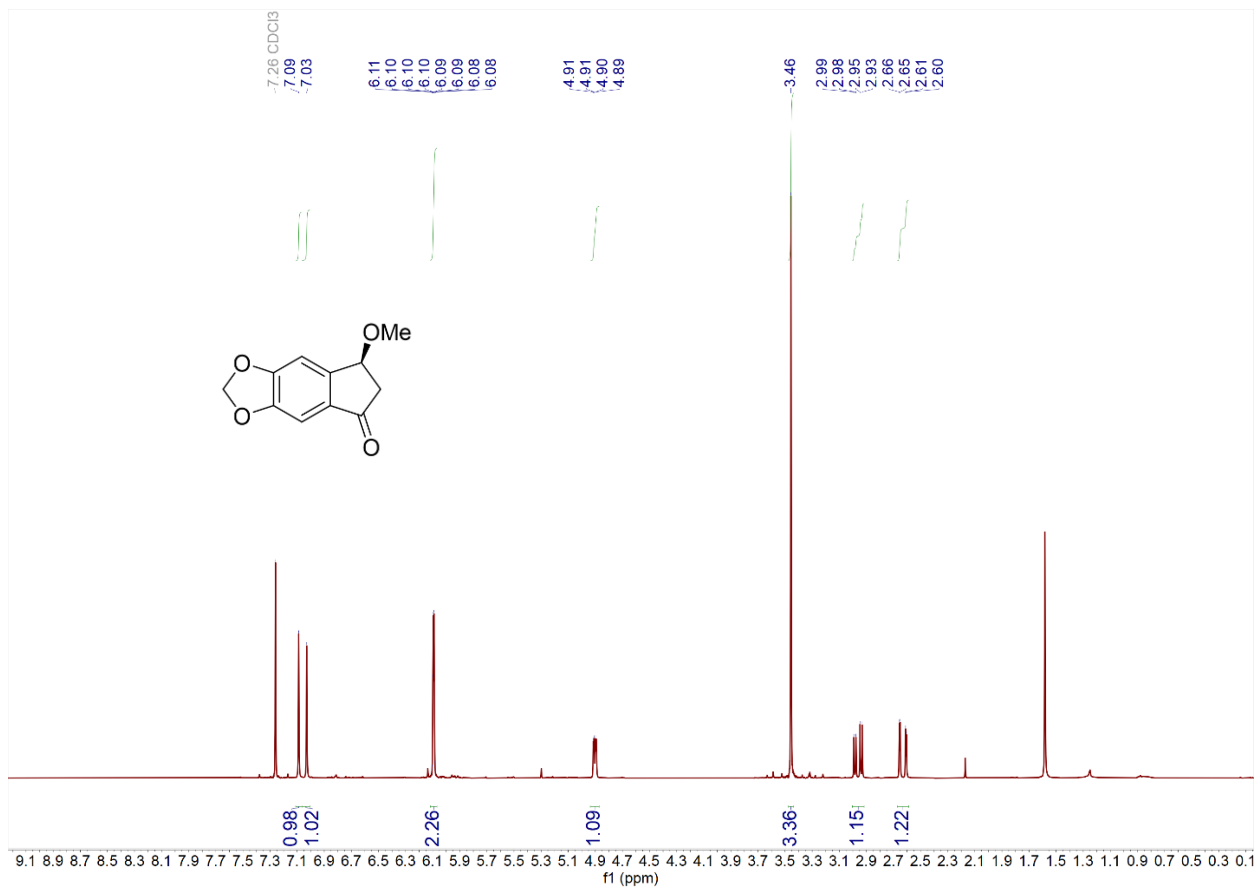

### <sup>1</sup>H NMR of 5m

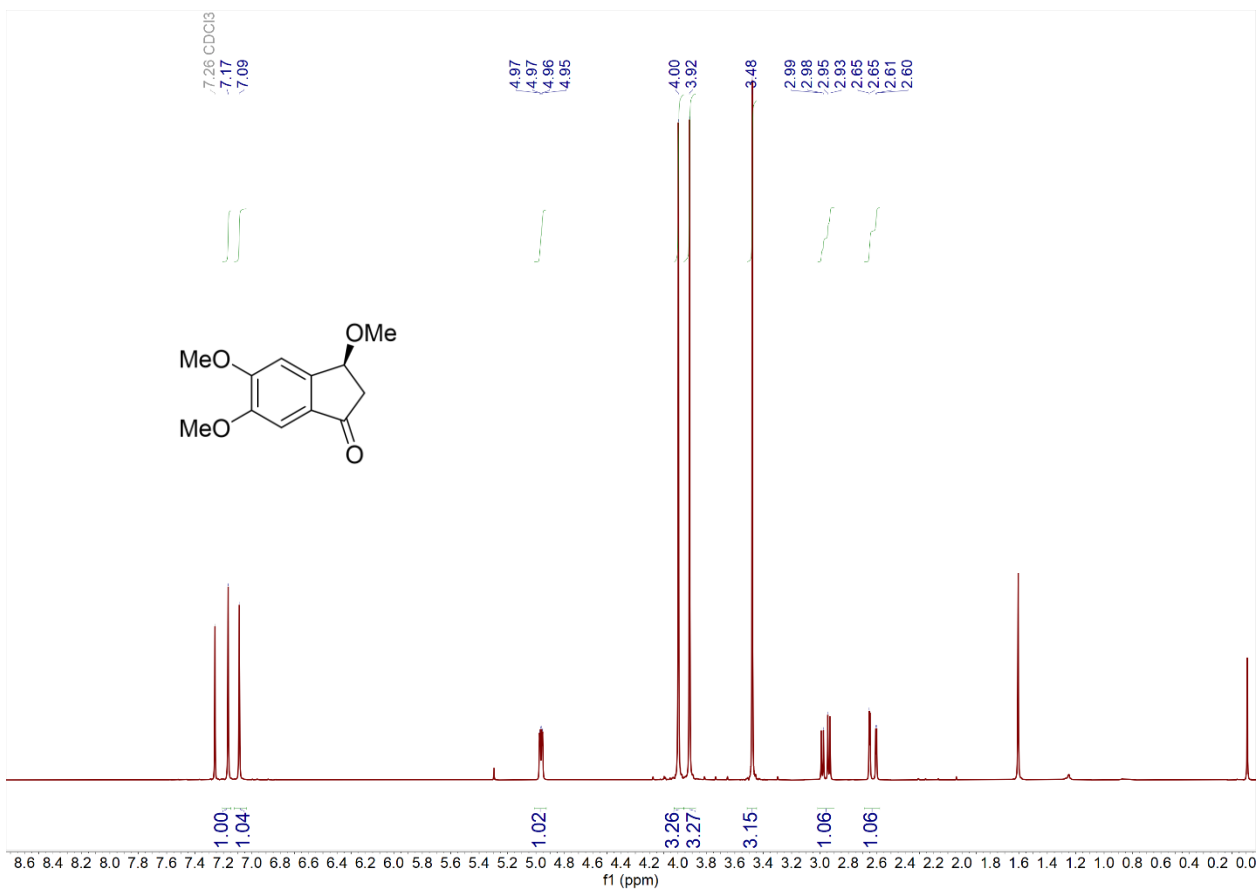

**<sup>1</sup>H NMR of 5n**

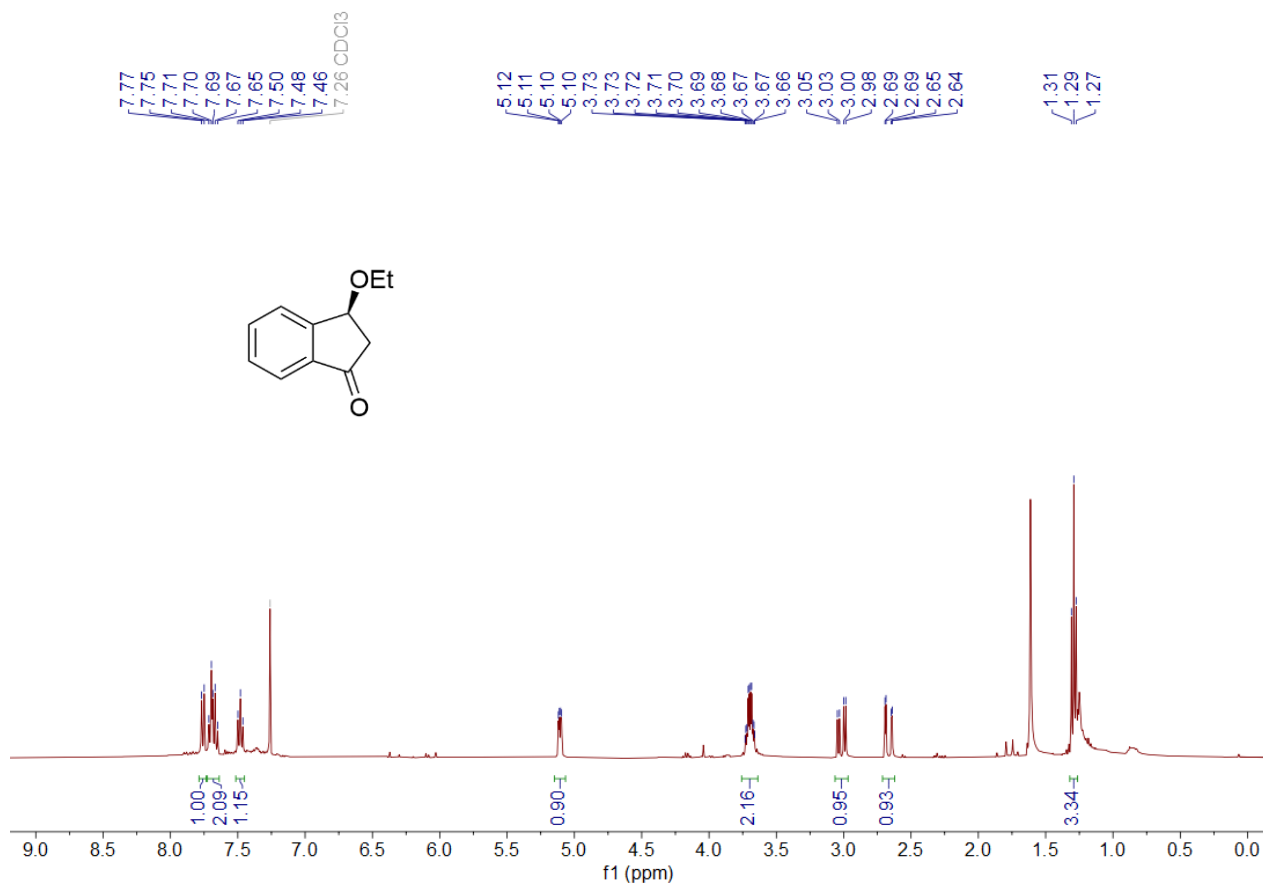

**<sup>1</sup>H NMR of 5o**

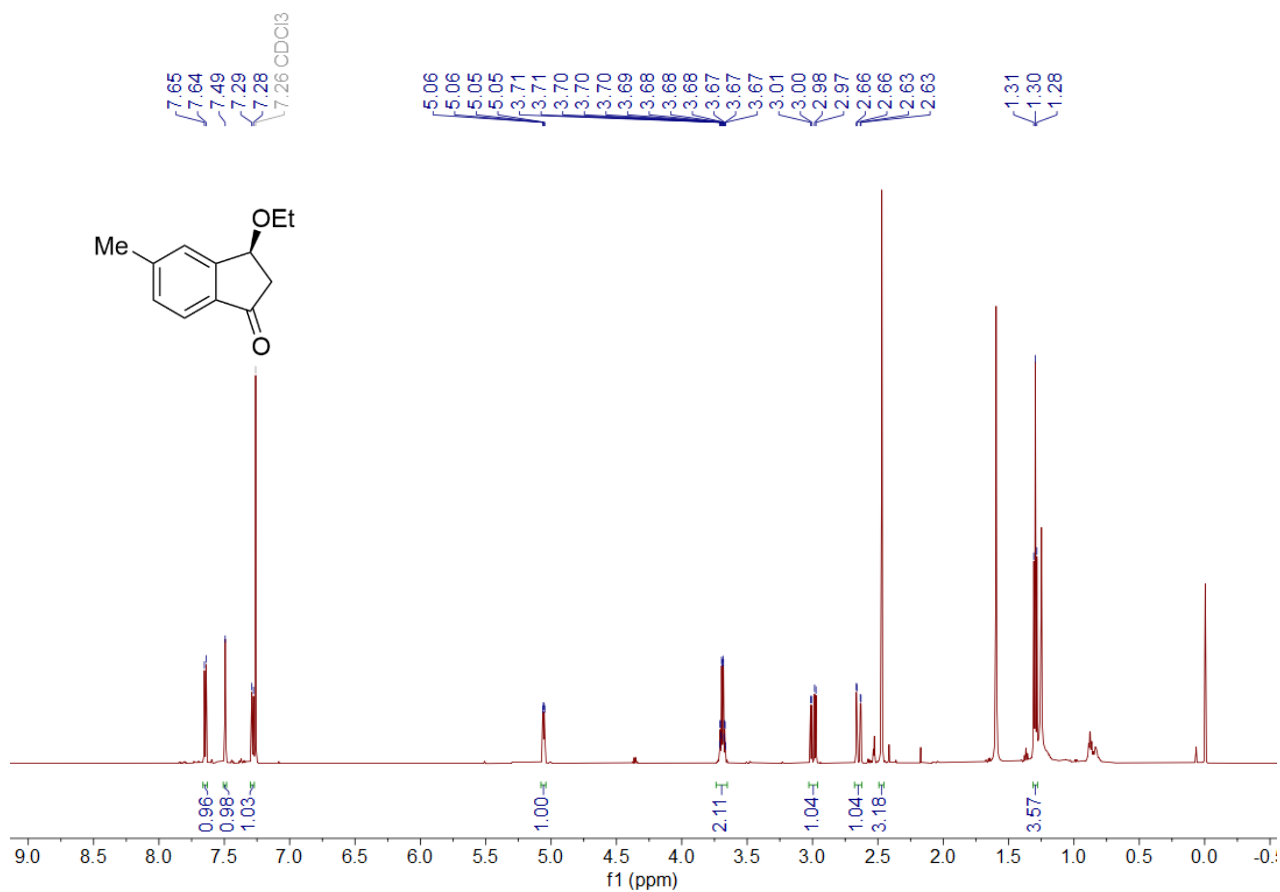

<sup>13</sup>C NMR of 5o

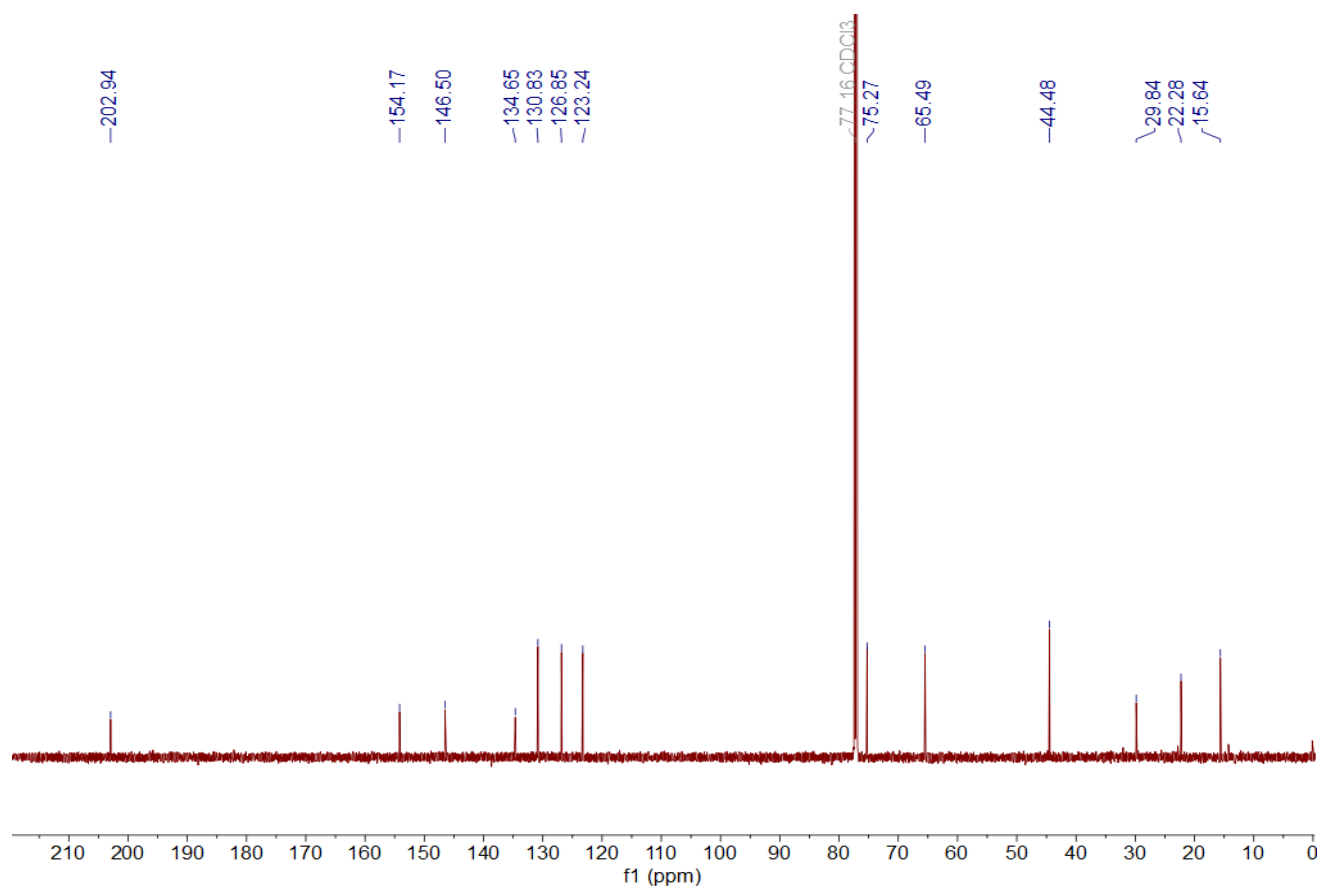

## Circular Dichroism Spectra

CD spectra of (*R*)-1a & (*S*)-1a in CH<sub>3</sub>CN (25 μM)

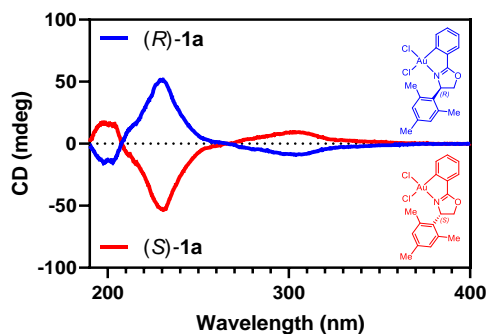

CD spectrum of (*R*)-1b in CH<sub>3</sub>CN (25 μM)

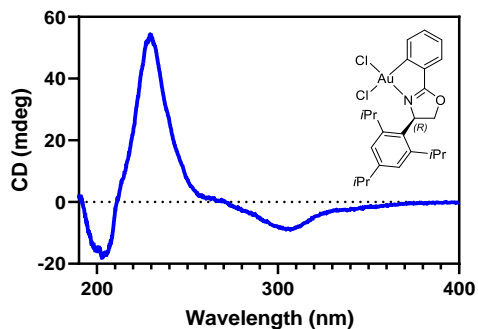

CD spectrum of (*S*)-1c in CH<sub>3</sub>CN (25 μM)

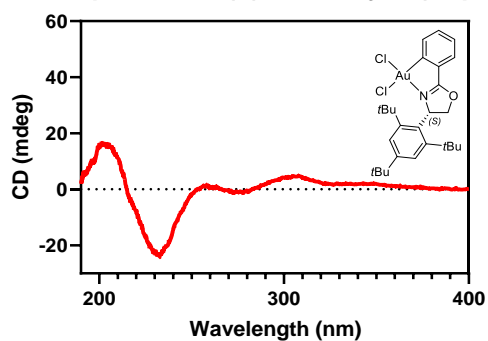

CD spectrum of (*R*)-1d in CH<sub>3</sub>CN (25 μM)

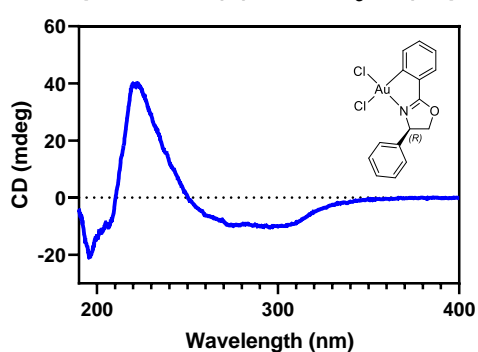

CD spectrum of (*R*)-1e in CH<sub>3</sub>CN (25 μM)

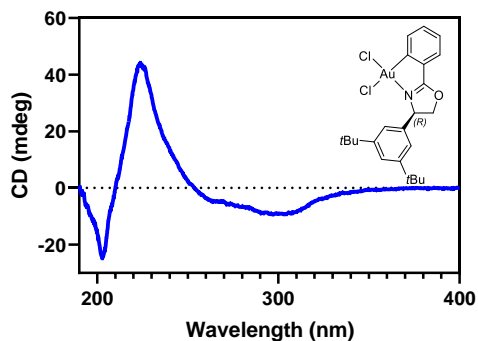

CD spectra of (*R*)-2b & (*S*)-2b in CH<sub>3</sub>CN (10 μM)

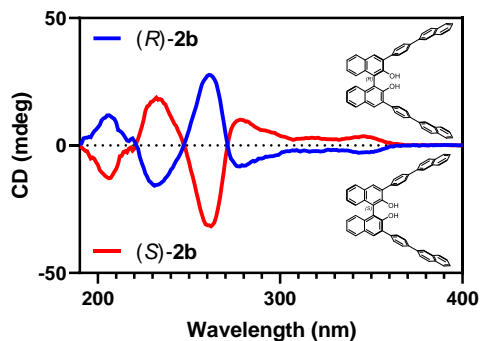

CD spectra of (*R*)-2c & (*S*)-2c in CH<sub>3</sub>CN (10 μM)

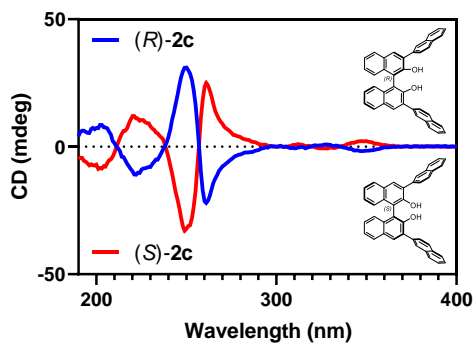

CD spectra of (*R*)-2d & (*S*)-2d in CH<sub>3</sub>CN (10 μM)

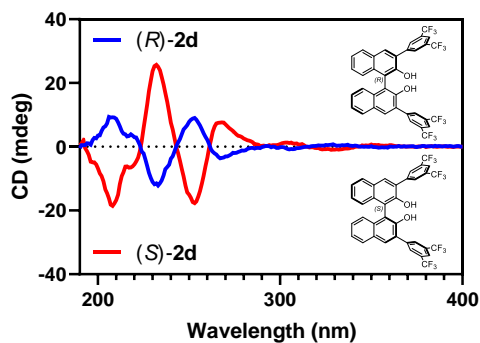

CD spectra of (*R*)-2e & (*S*)-2e in CH<sub>3</sub>CN (10 μM)

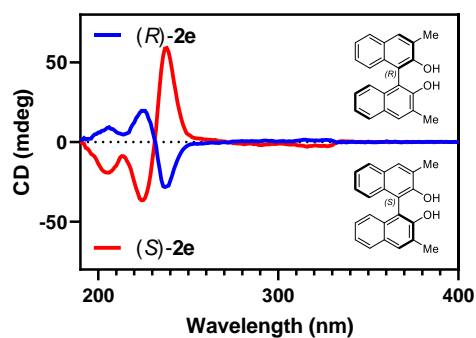

CD spectra of (*R*)-2f & (*S*)-2f in CH<sub>3</sub>CN (10 μM)

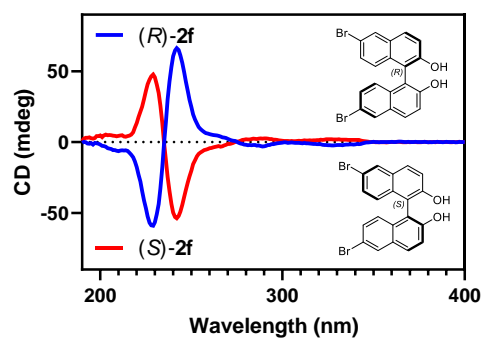

CD spectra of (*R,R*)-3a & (*S,S*)-3a in CH<sub>3</sub>CN (25 μM)

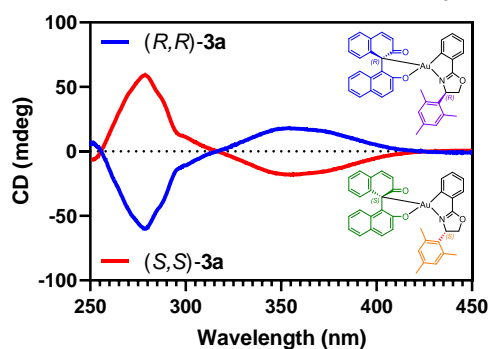

CD spectra of (*R,S*)-3a & (*S,R*)-3a in CH<sub>3</sub>CN (25 μM)

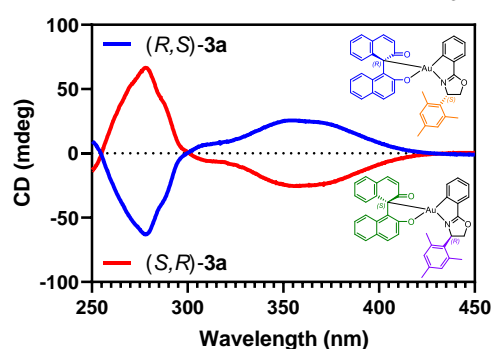

CD spectrum of (*R,S*)-3b in CH<sub>3</sub>CN (25 μM)

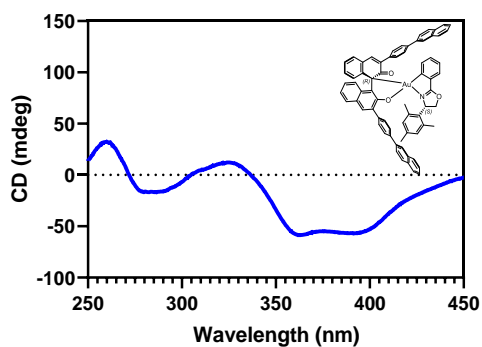

CD spectrum of (*S,S*)-3b in CH<sub>3</sub>CN (25 μM)

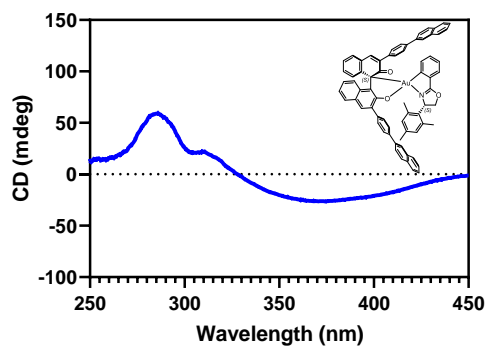

CD spectra of (*R,S*)-3c in CH<sub>3</sub>CN (25 μM)

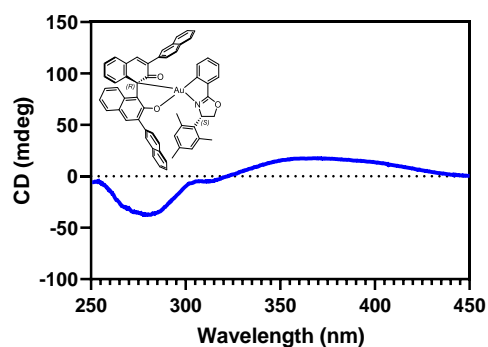

CD spectrum of (*S,S*)-3c in CH<sub>3</sub>CN (25 μM)

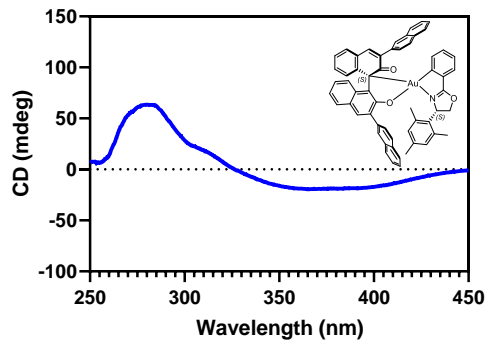

CD spectrum of (*R,S*)-3d in CH<sub>3</sub>CN (25 μM)

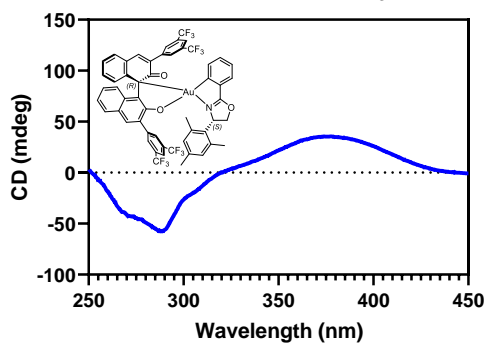

CD spectrum of (*R,S*)-3e in CH<sub>3</sub>CN (25 μM)

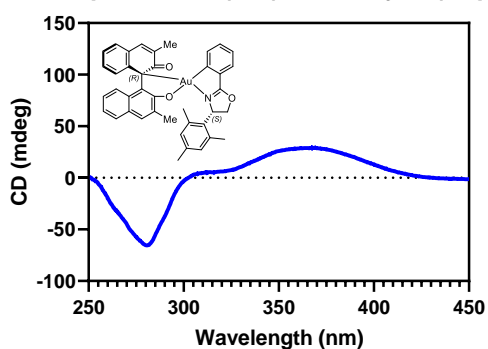

CD spectrum of (*R,S*)-3f in CH<sub>3</sub>CN (25 μM)

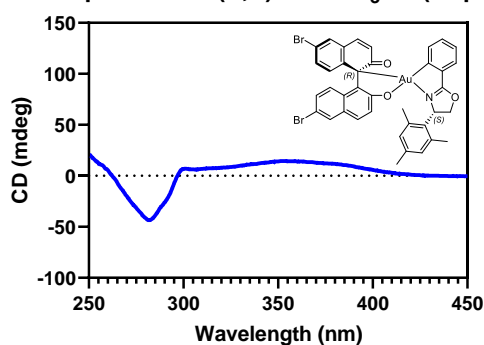

CD spectrum of (*S,S*)-3f in CH<sub>3</sub>CN (25 μM)

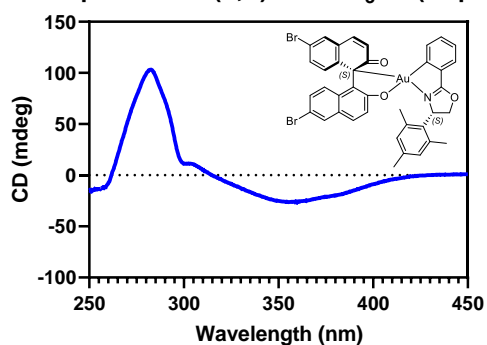

CD spectrum of (*R,R*)-3g in CH<sub>3</sub>CN (25 μM)

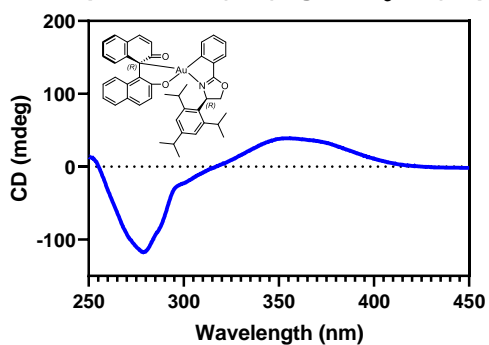

CD spectrum of (*R,S*)-3h in CH<sub>3</sub>CN (25 μM)

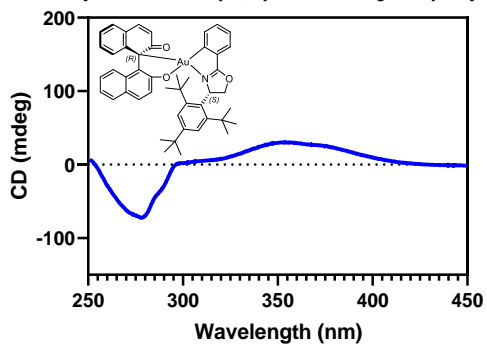

CD spectrum of (*R,R*)-3i in CH<sub>3</sub>CN (25 μM)

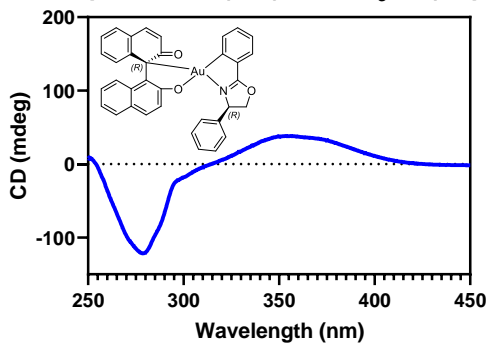

CD spectrum of (*R,R*)-3j in CH<sub>3</sub>CN (25 μM)

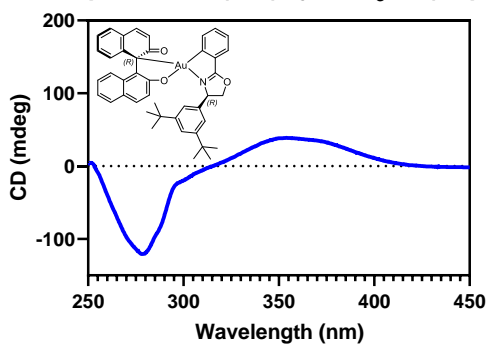

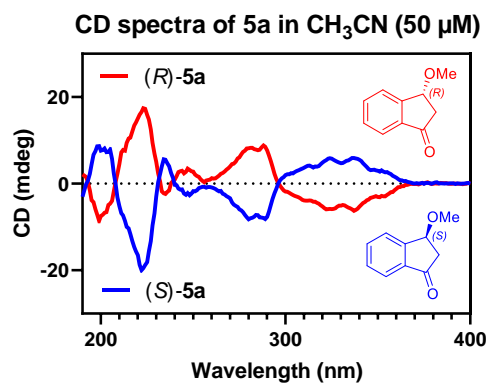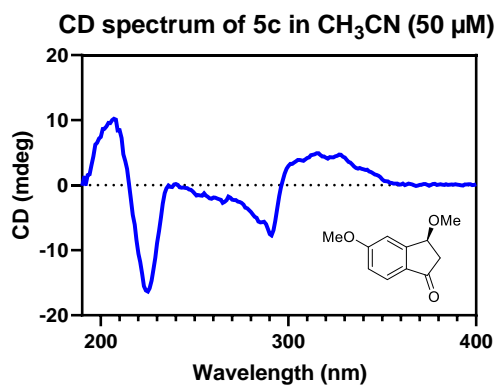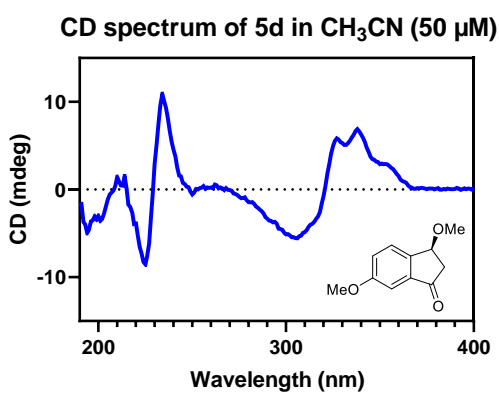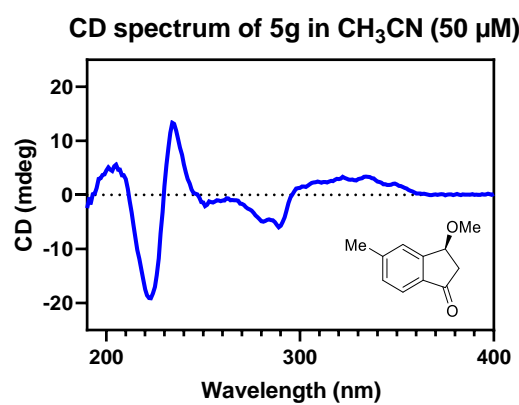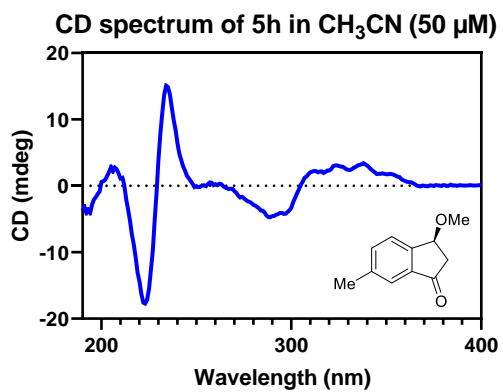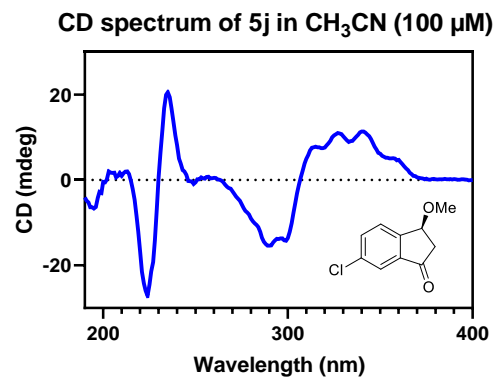



## Chiral HPLC Spectra

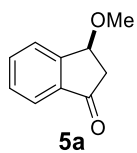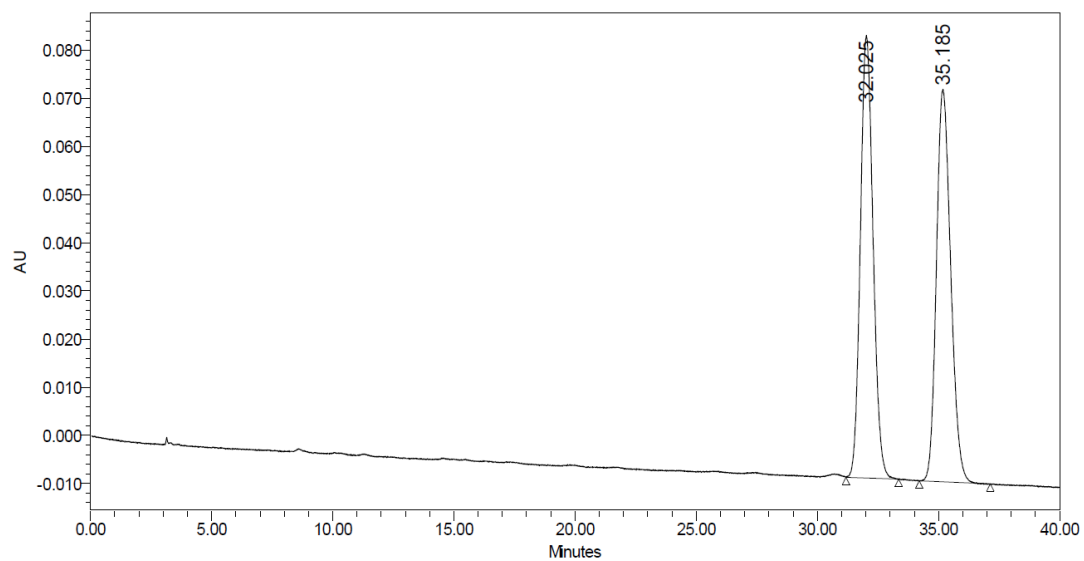

|   | RT     | Area    | % Area | Height |
|---|--------|---------|--------|--------|
| 1 | 32.025 | 3335751 | 49.97  | 91905  |
| 2 | 35.185 | 3339876 | 50.03  | 81532  |

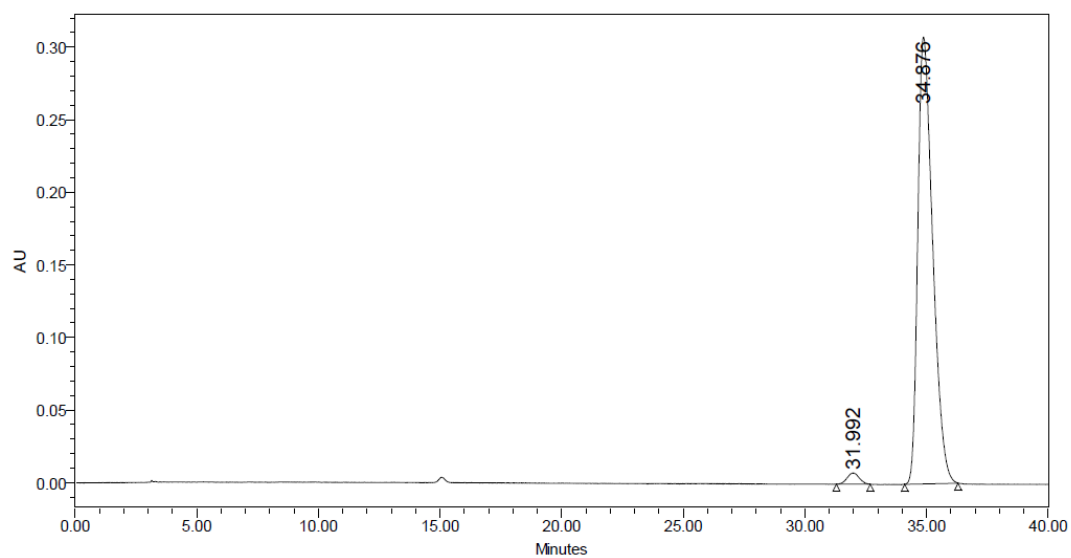

|   | RT     | Area     | % Area | Height |
|---|--------|----------|--------|--------|
| 1 | 31.992 | 266726   | 2.00   | 7820   |
| 2 | 34.876 | 13090260 | 98.00  | 307810 |

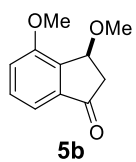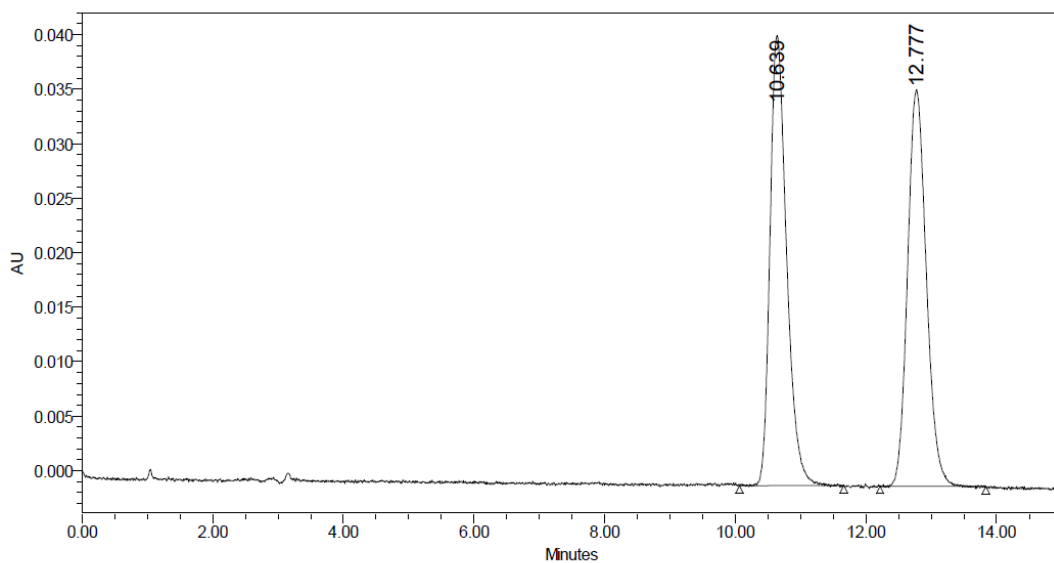

|   | RT     | Area   | % Area | Height |
|---|--------|--------|--------|--------|
| 1 | 10.639 | 728809 | 50.10  | 41286  |
| 2 | 12.777 | 725877 | 49.90  | 36392  |

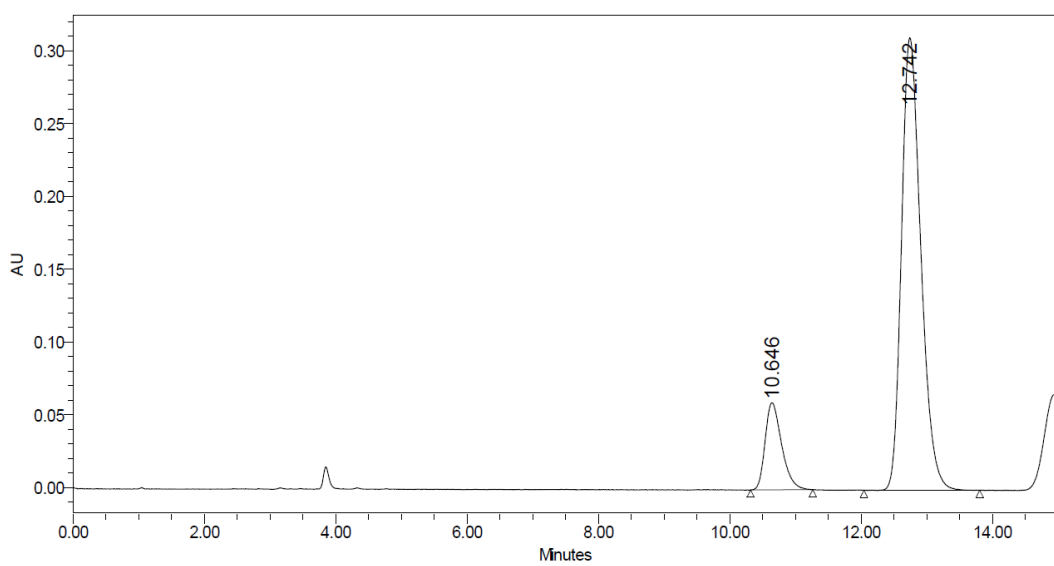

|   | RT     | Area    | % Area | Height |
|---|--------|---------|--------|--------|
| 1 | 10.646 | 1045041 | 14.12  | 59786  |
| 2 | 12.742 | 6353486 | 85.88  | 310405 |

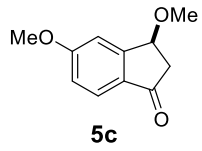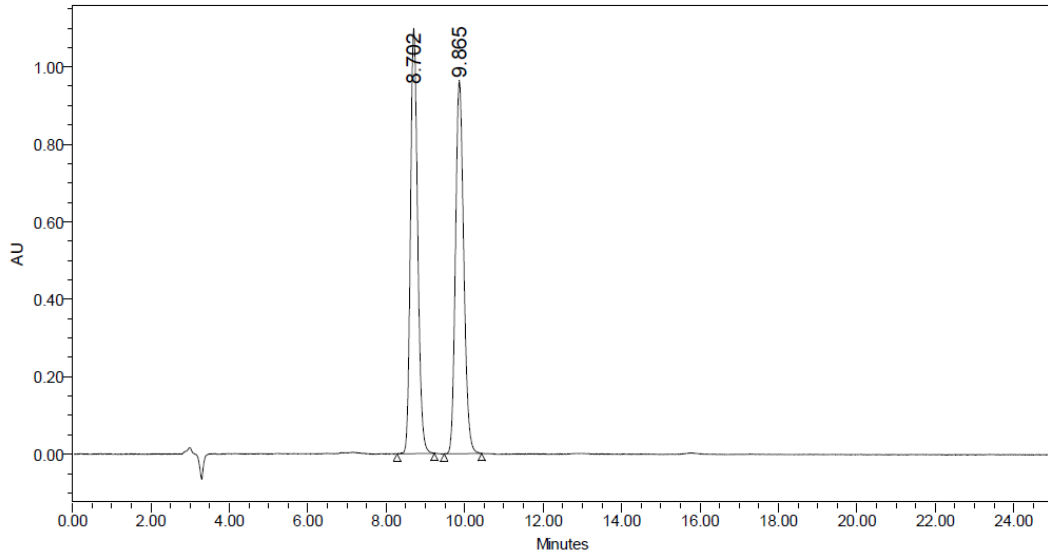

|   | RT    | Area     | % Area | Height  |
|---|-------|----------|--------|---------|
| 1 | 8.702 | 14067188 | 49.96  | 1097850 |
| 2 | 9.865 | 14090697 | 50.04  | 962786  |

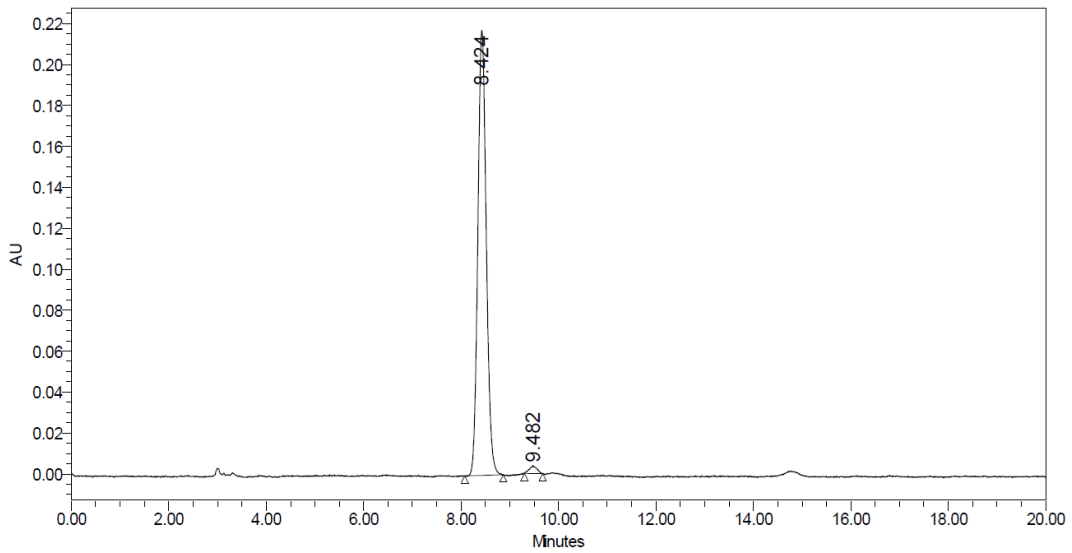

|   | RT    | Area    | % Area | Height |
|---|-------|---------|--------|--------|
| 1 | 8.424 | 2606862 | 98.45  | 217243 |
| 2 | 9.482 | 41037   | 1.55   | 3822   |

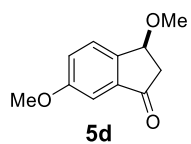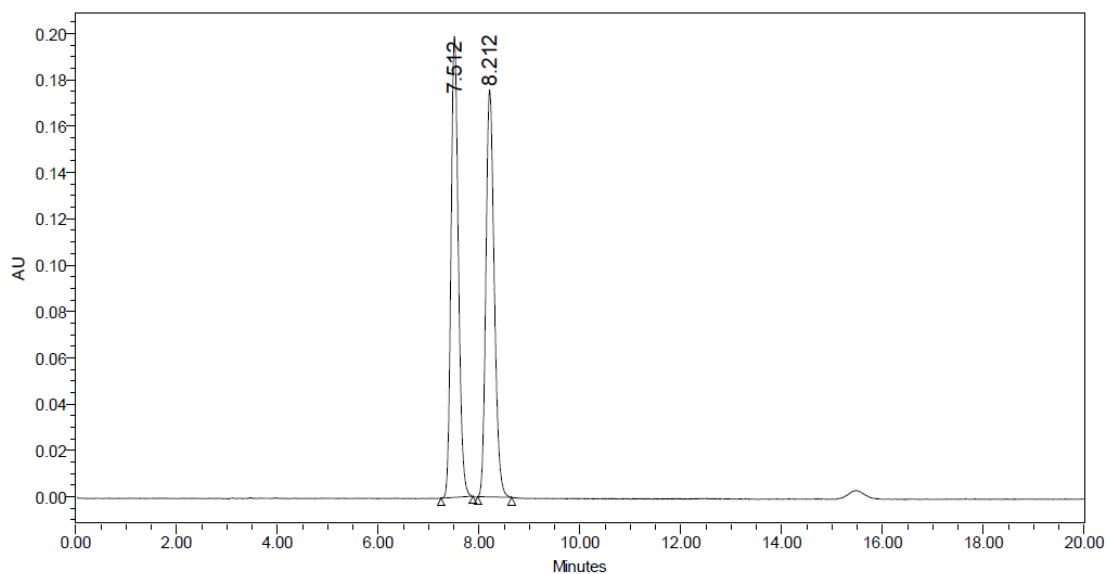

|   | RT    | Area    | % Area | Height |
|---|-------|---------|--------|--------|
| 1 | 7.512 | 2017376 | 49.97  | 199046 |
| 2 | 8.212 | 2020108 | 50.03  | 175643 |

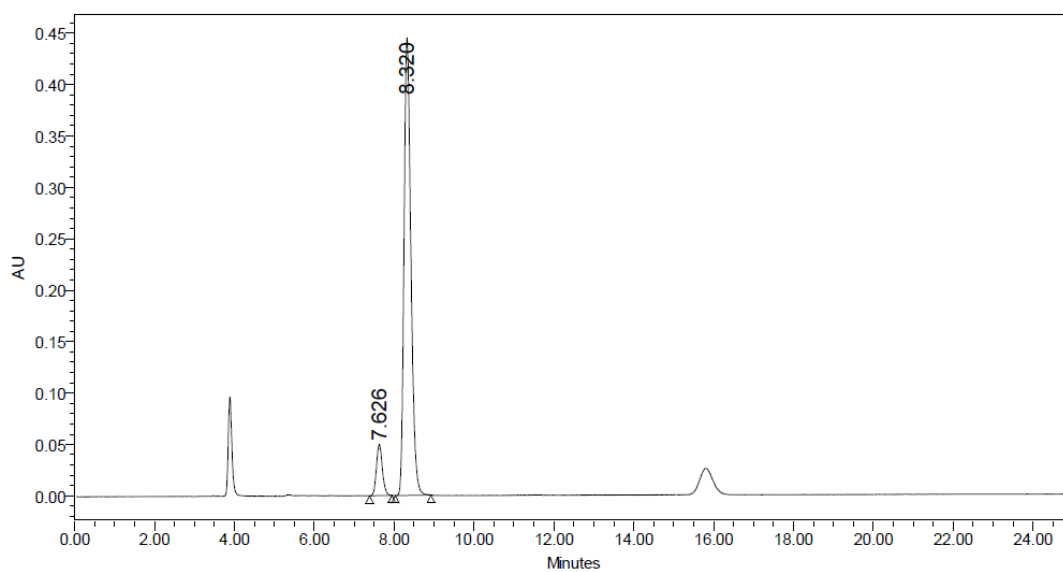

|   | RT    | Area    | % Area | Height |
|---|-------|---------|--------|--------|
| 1 | 7.626 | 513803  | 8.80   | 49879  |
| 2 | 8.320 | 5322388 | 91.20  | 444969 |

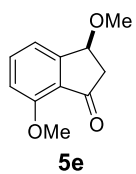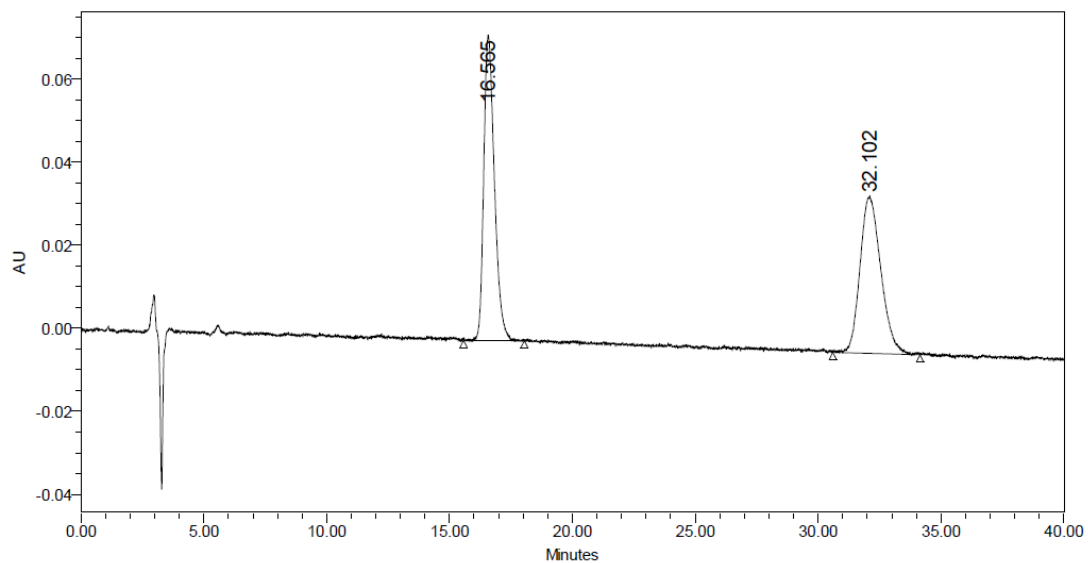

|   | RT     | Area    | % Area | Height |
|---|--------|---------|--------|--------|
| 1 | 16.565 | 2215504 | 49.82  | 73561  |
| 2 | 32.102 | 2231404 | 50.18  | 37849  |

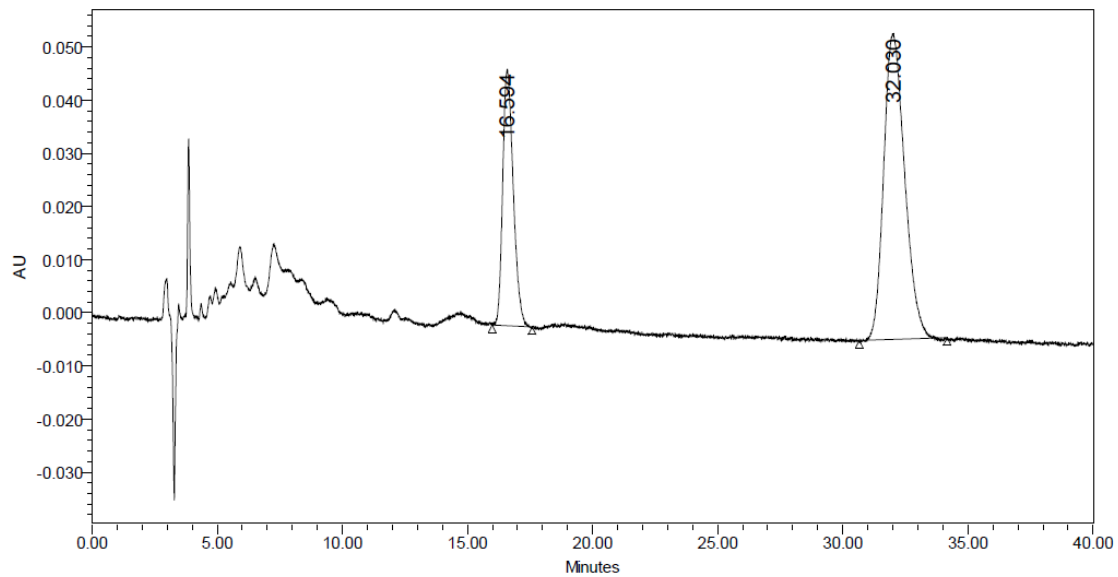

|   | RT     | Area    | % Area | Height |
|---|--------|---------|--------|--------|
| 1 | 16.594 | 1413867 | 29.67  | 48268  |
| 2 | 32.030 | 3351940 | 70.33  | 57559  |

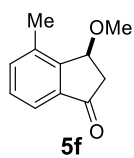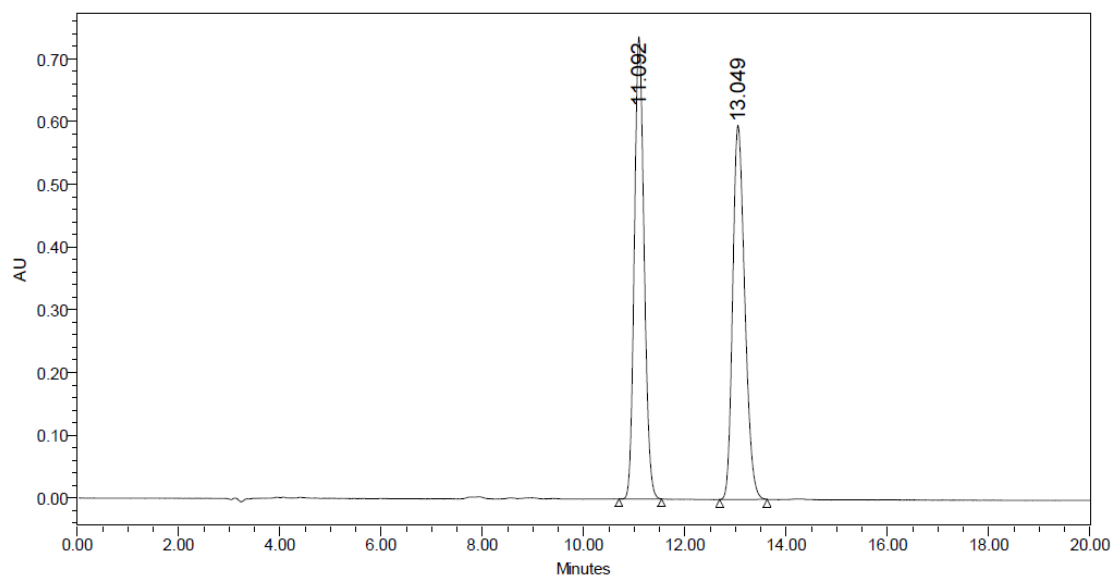

|   | RT     | Area    | % Area | Height |
|---|--------|---------|--------|--------|
| 1 | 11.092 | 9868393 | 49.92  | 736806 |
| 2 | 13.049 | 9899020 | 50.08  | 595959 |

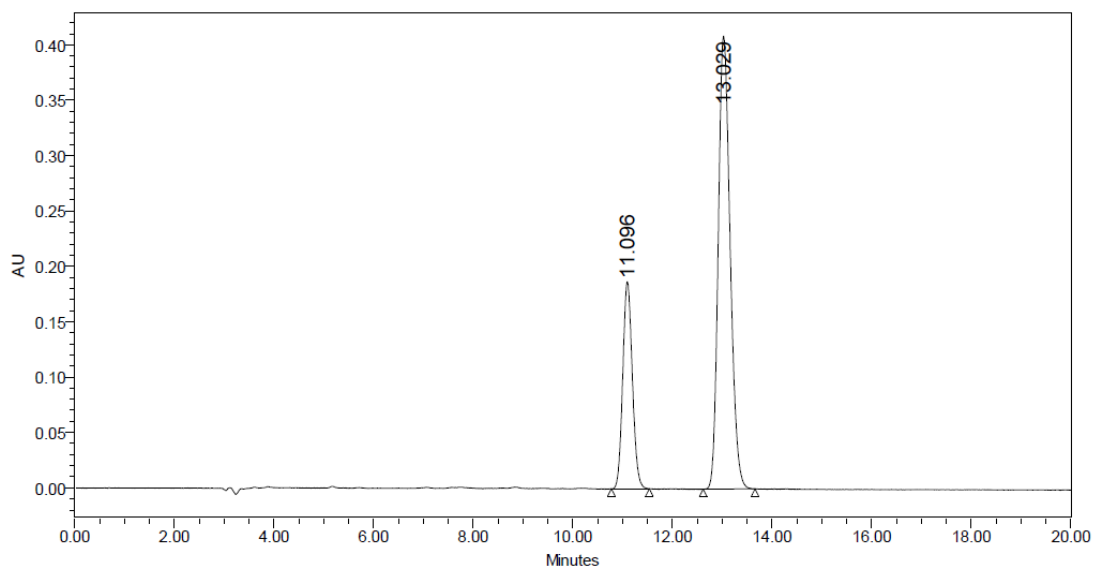

|   | RT     | Area    | % Area | Height |
|---|--------|---------|--------|--------|
| 1 | 11.096 | 2497917 | 26.95  | 186921 |
| 2 | 13.029 | 6771027 | 73.05  | 409026 |

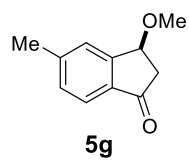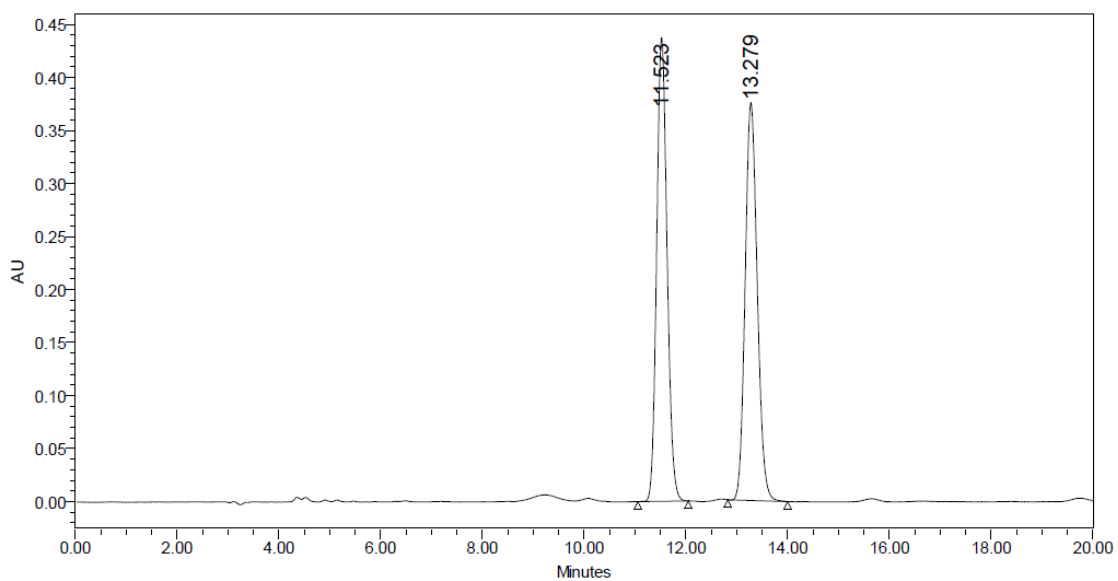

|   | RT     | Area    | % Area | Height |
|---|--------|---------|--------|--------|
| 1 | 11.523 | 6209010 | 50.02  | 437394 |
| 2 | 13.279 | 6204488 | 49.98  | 375066 |

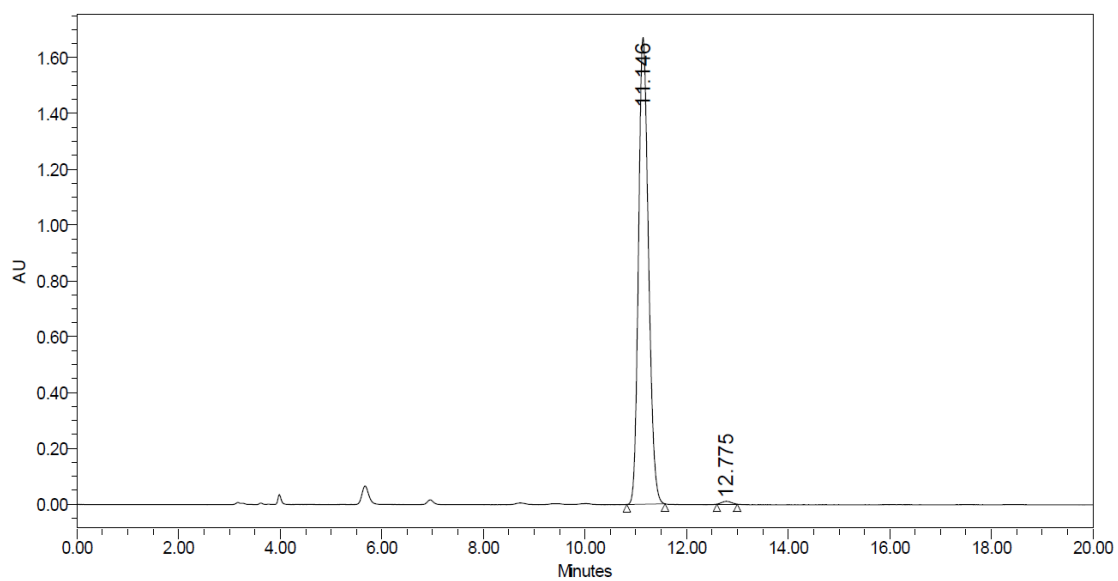

|   | RT     | Area     | % Area | Height  |
|---|--------|----------|--------|---------|
| 1 | 11.146 | 22756481 | 99.44  | 1670885 |
| 2 | 12.775 | 129130   | 0.56   | 10125   |

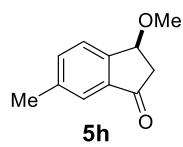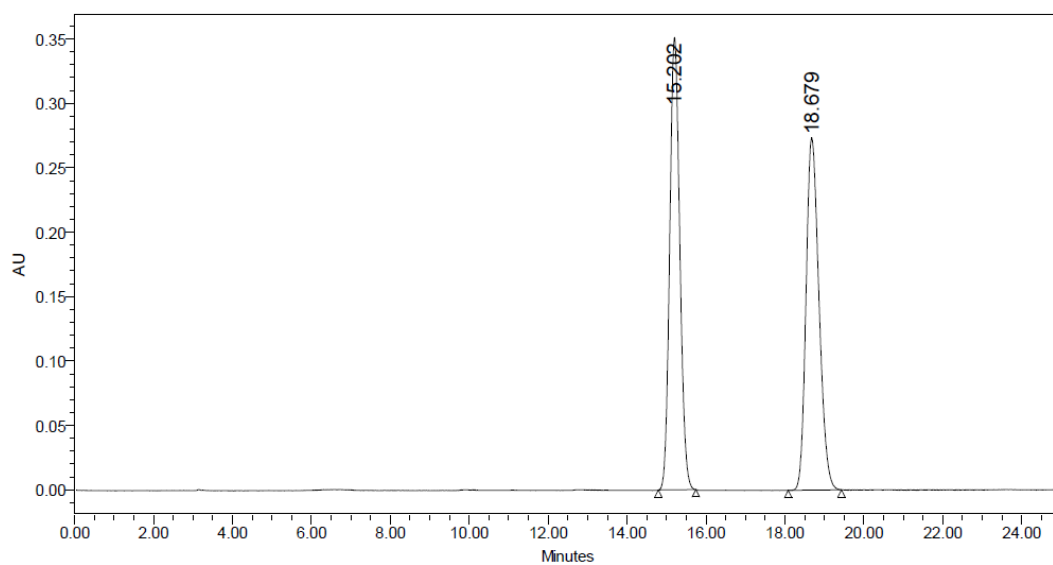

|   | RT     | Area    | % Area | Height |
|---|--------|---------|--------|--------|
| 1 | 15.202 | 6216918 | 49.95  | 351253 |
| 2 | 18.679 | 6229821 | 50.05  | 273614 |

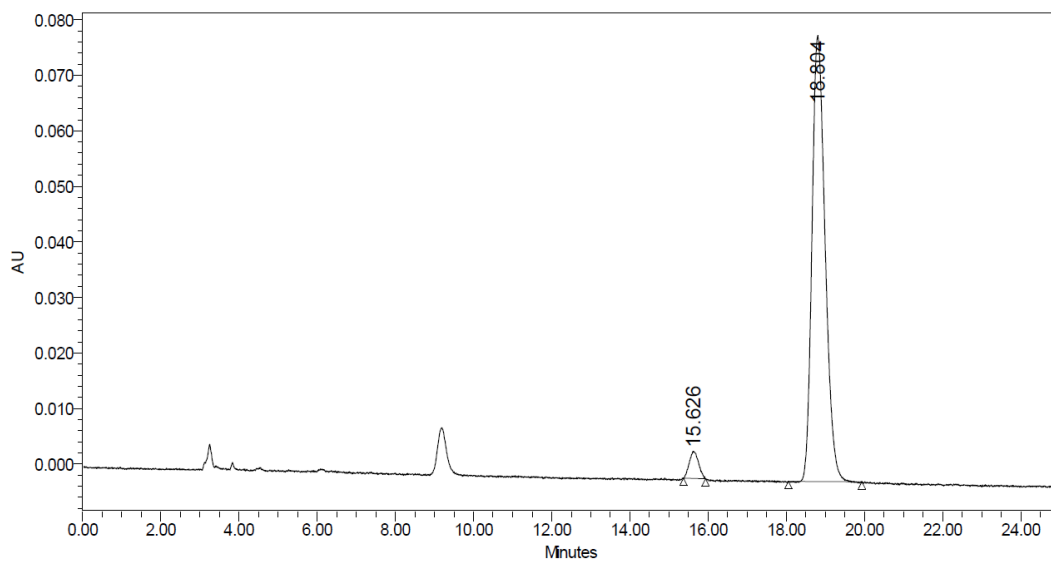

|   | RT     | Area    | % Area | Height |
|---|--------|---------|--------|--------|
| 1 | 15.626 | 80493   | 4.12   | 4869   |
| 2 | 18.804 | 1870862 | 95.88  | 80325  |



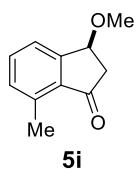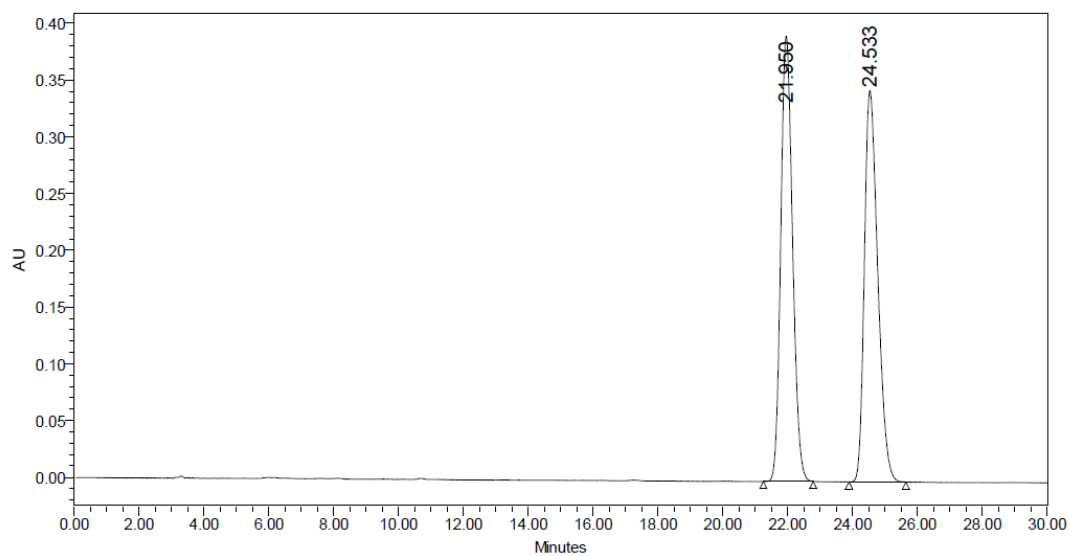

|   | RT     | Area    | % Area | Height |
|---|--------|---------|--------|--------|
| 1 | 21.950 | 9882286 | 49.98  | 392346 |
| 2 | 24.533 | 9890811 | 50.02  | 344861 |

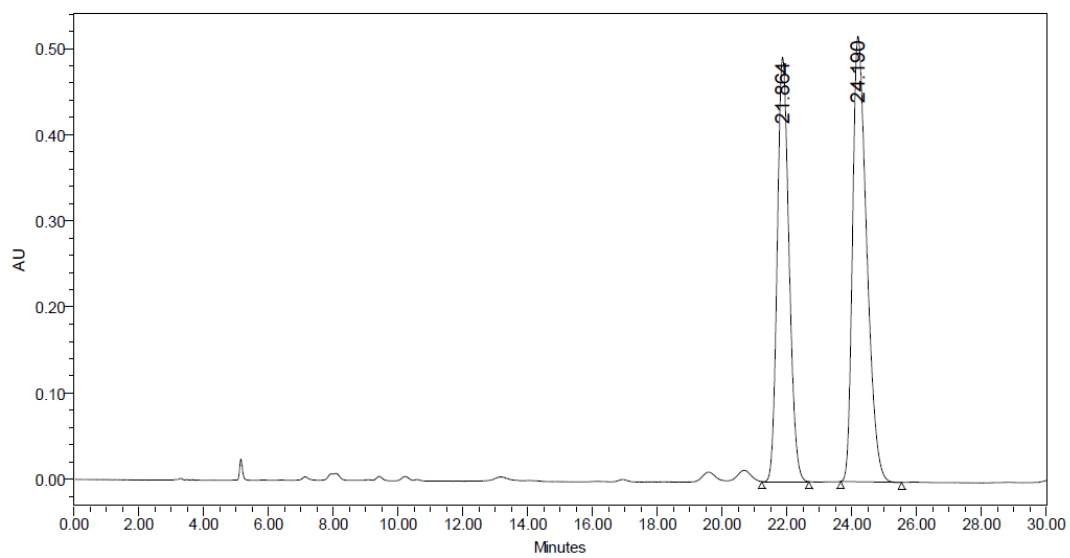

|   | RT     | Area     | % Area | Height |
|---|--------|----------|--------|--------|
| 1 | 21.864 | 12420463 | 44.23  | 492907 |
| 2 | 24.190 | 15657952 | 55.77  | 517294 |

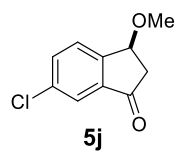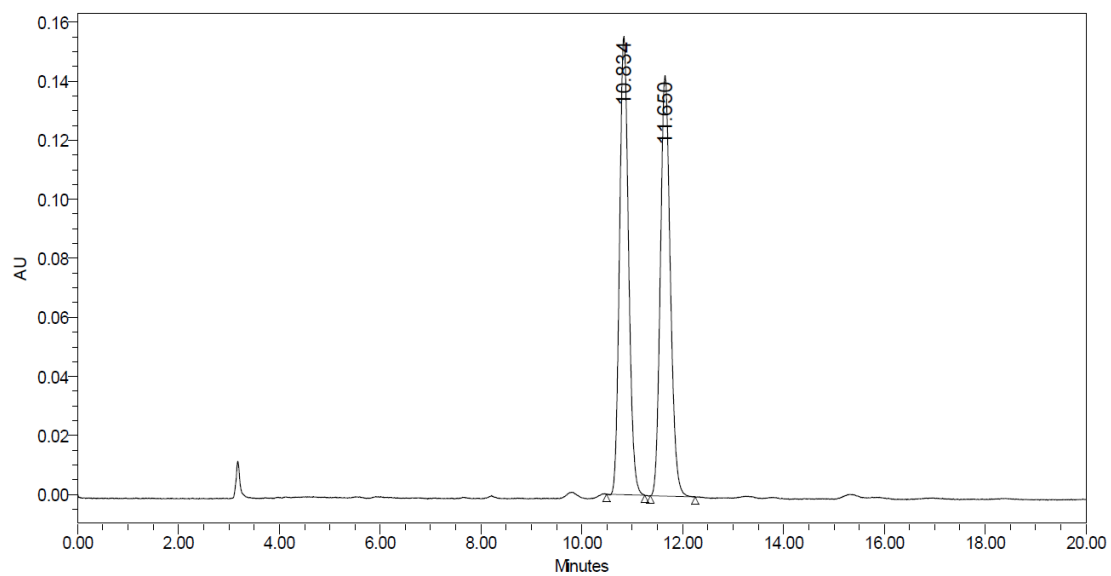

|   | RT     | Area    | % Area | Height |
|---|--------|---------|--------|--------|
| 1 | 10.834 | 1926271 | 49.80  | 155179 |
| 2 | 11.650 | 1941972 | 50.20  | 142341 |

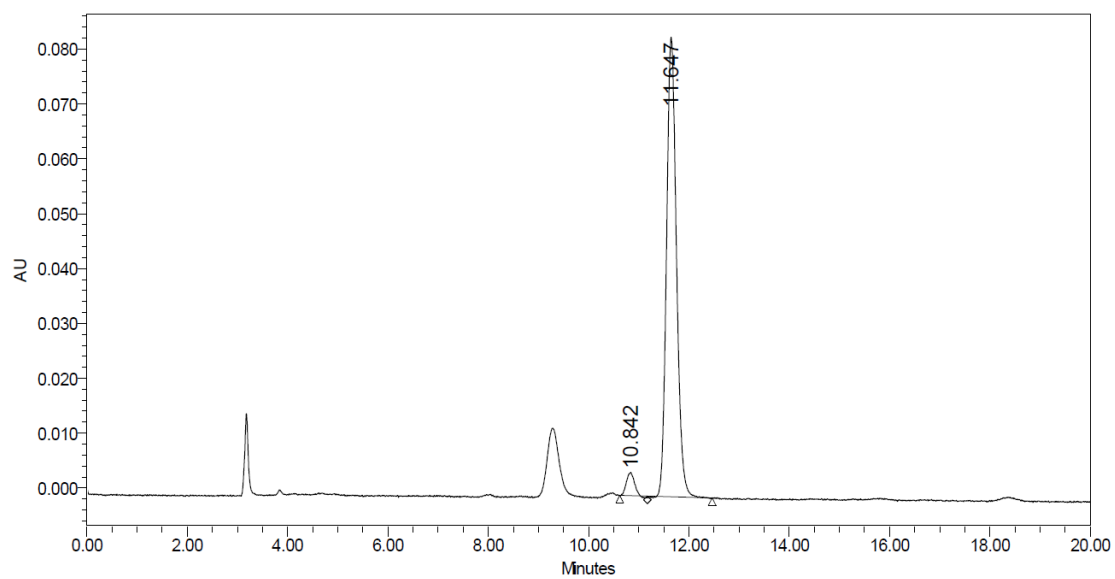

|   | RT     | Area    | % Area | Height |
|---|--------|---------|--------|--------|
| 1 | 10.842 | 48848   | 4.08   | 4222   |
| 2 | 11.647 | 1148199 | 95.92  | 83746  |

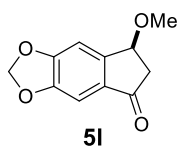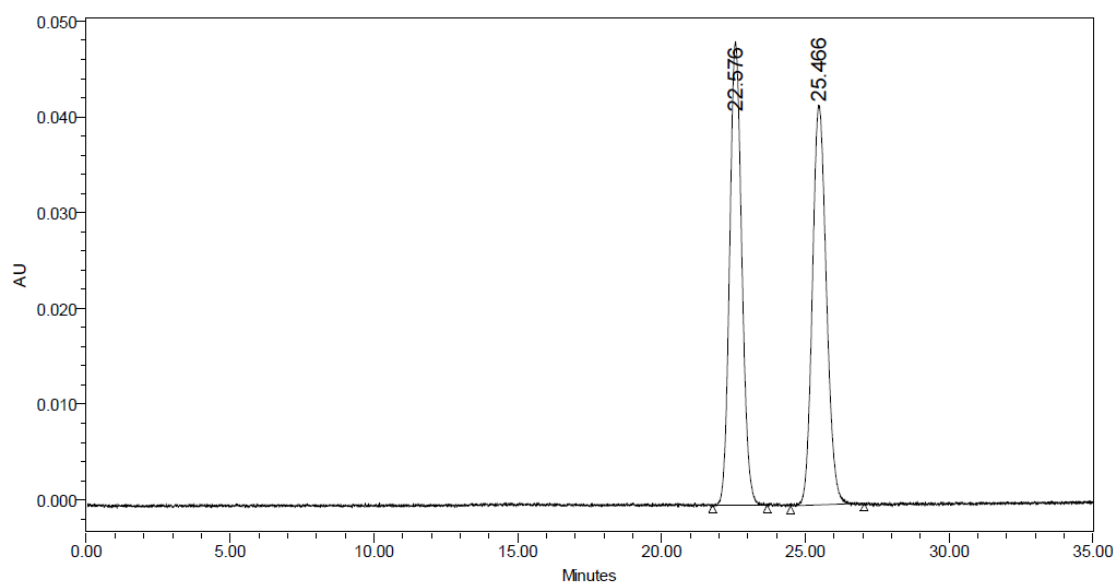

|   | RT     | Area    | % Area | Height |
|---|--------|---------|--------|--------|
| 1 | 22.576 | 1414220 | 49.92  | 48379  |
| 2 | 25.466 | 1418849 | 50.08  | 41742  |

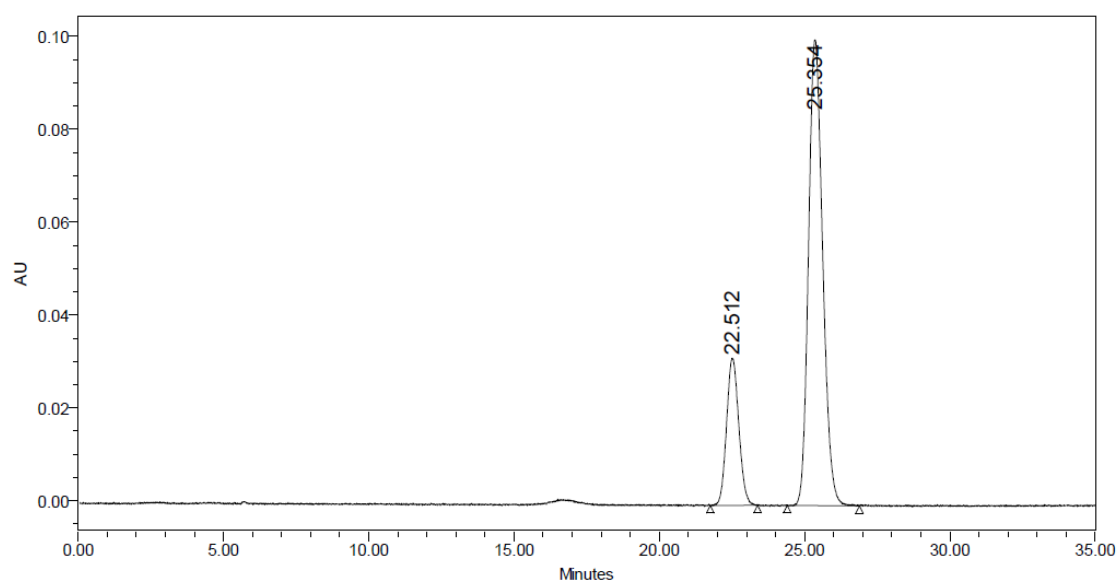

|   | RT     | Area    | % Area | Height |
|---|--------|---------|--------|--------|
| 1 | 22.512 | 926649  | 21.42  | 31678  |
| 2 | 25.354 | 3398684 | 78.58  | 100307 |

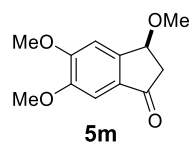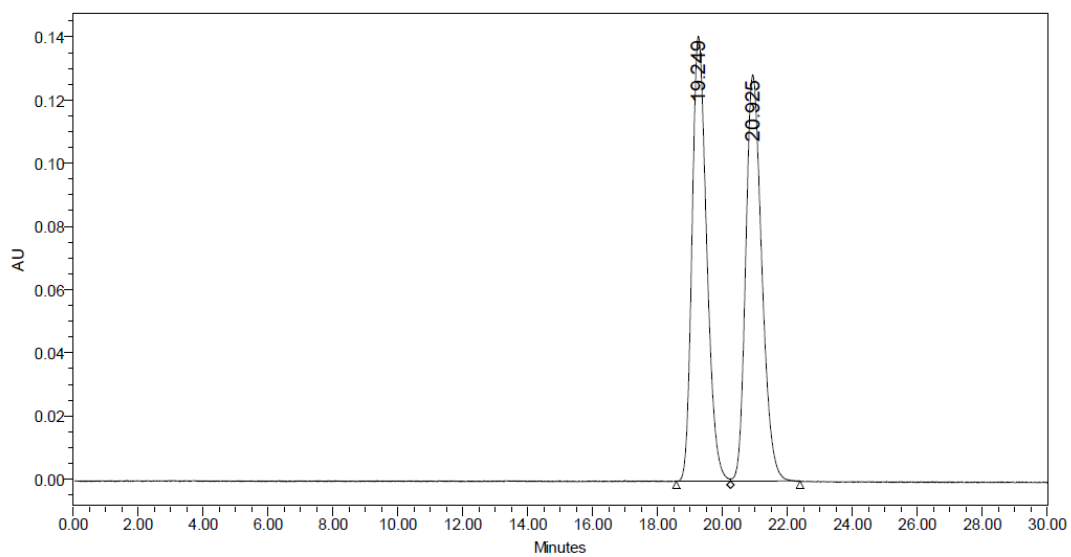

|   | RT     | Area    | % Area | Height |
|---|--------|---------|--------|--------|
| 1 | 19.249 | 4413641 | 49.98  | 140948 |
| 2 | 20.925 | 4416559 | 50.02  | 128657 |

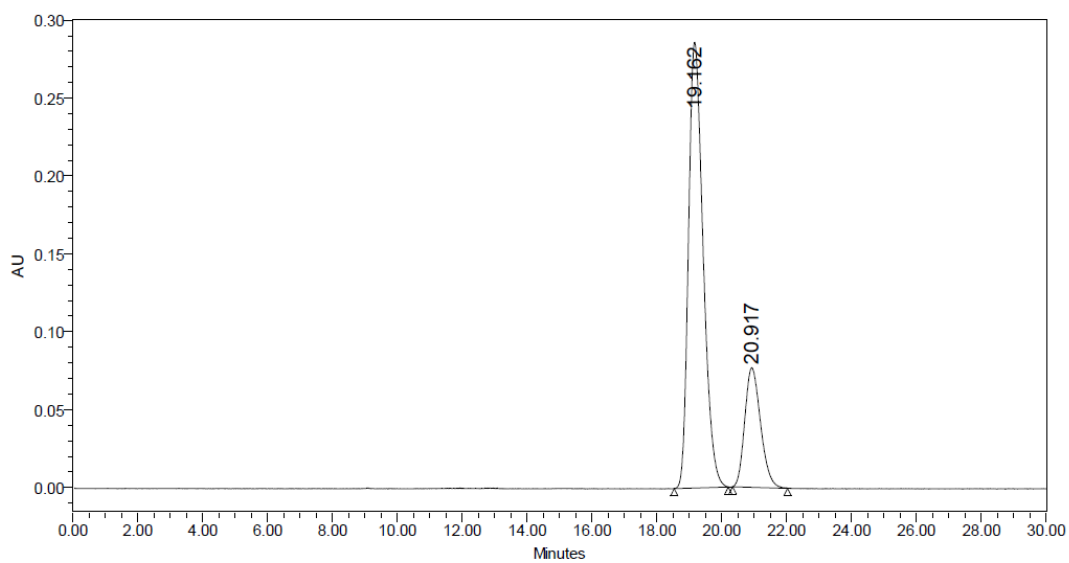

|   | RT     | Area    | % Area | Height |
|---|--------|---------|--------|--------|
| 1 | 19.162 | 8949849 | 77.51  | 286188 |
| 2 | 20.917 | 2596948 | 22.49  | 76762  |

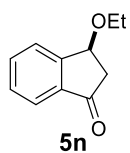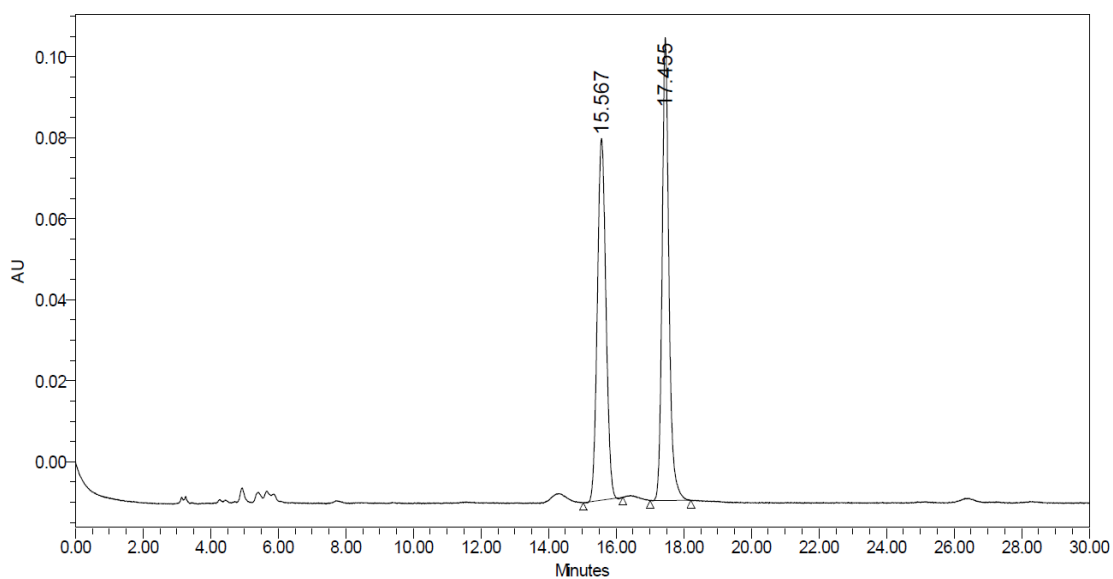

|   | RT     | Area    | % Area | Height |
|---|--------|---------|--------|--------|
| 1 | 15.567 | 1575045 | 49.68  | 89313  |
| 2 | 17.455 | 1595096 | 50.32  | 114268 |

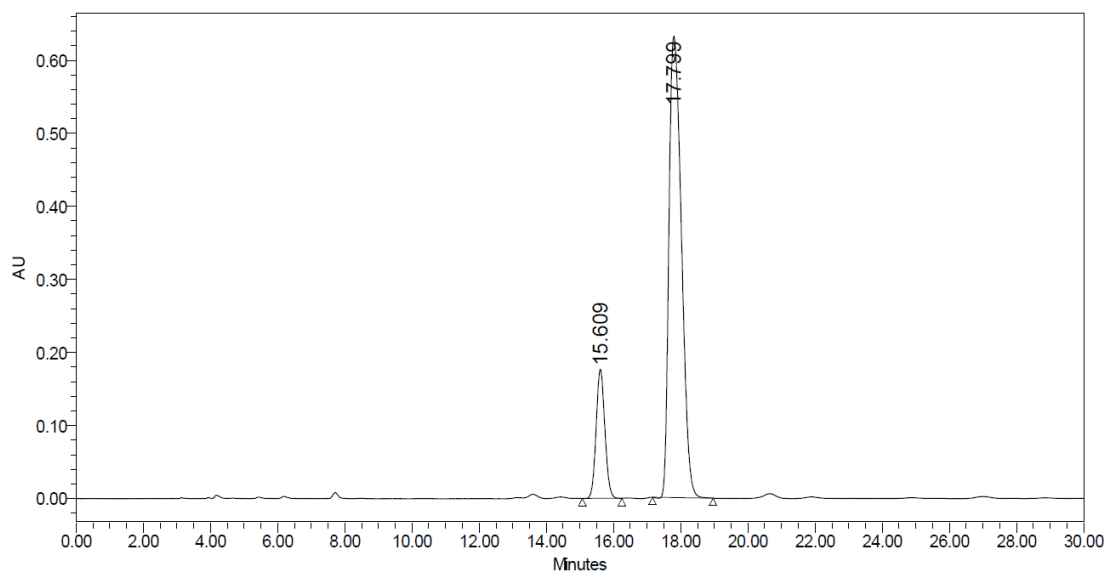

|   | RT     | Area     | % Area | Height |
|---|--------|----------|--------|--------|
| 1 | 15.609 | 3183785  | 16.37  | 176664 |
| 2 | 17.799 | 16259591 | 83.63  | 631625 |

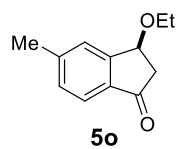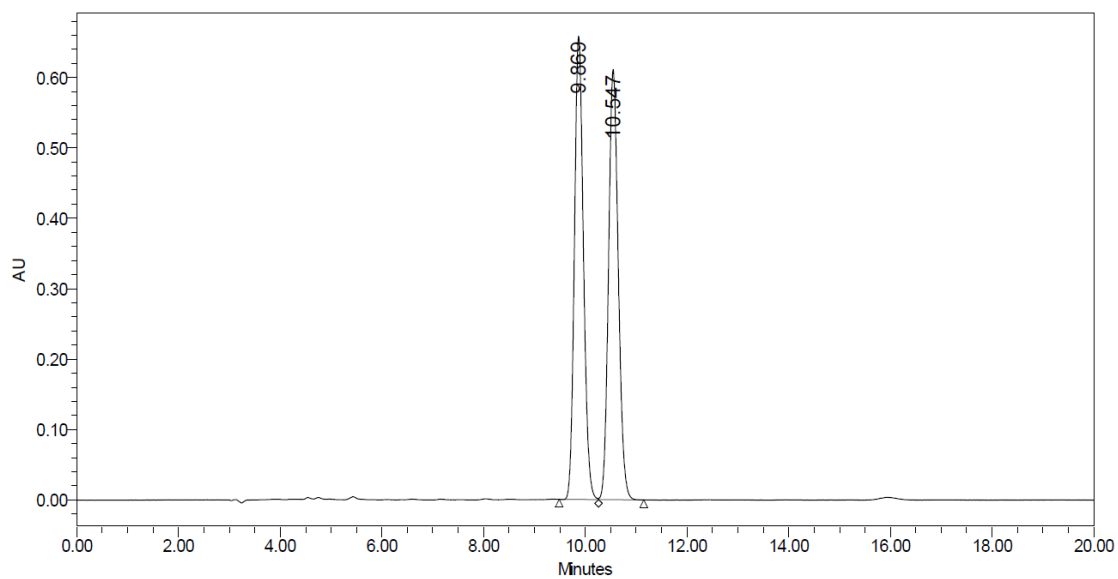

|   | RT     | Area    | % Area | Height |
|---|--------|---------|--------|--------|
| 1 | 9.869  | 8106296 | 49.97  | 657677 |
| 2 | 10.547 | 8114833 | 50.03  | 610820 |

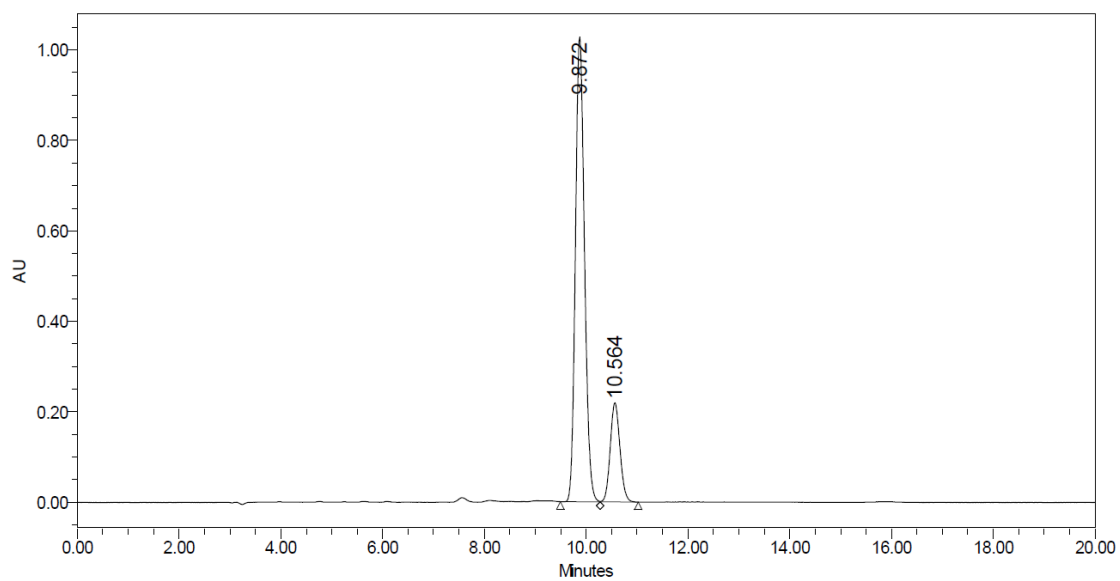

|   | RT     | Area     | % Area | Height  |
|---|--------|----------|--------|---------|
| 1 | 9.872  | 12719001 | 81.38  | 1027080 |
| 2 | 10.564 | 2909641  | 18.62  | 219077  |

## References

1. J. C. Barrow, P. L. Ngo, J. M. Pellicore, H. G Selnick, P. G. Nantermet, *Tetrahedron Lett.*, 2001, **42**, 2051 – 2054.
2. J.-J. Jiang, J.-F. Cui, B. Yang, Y. Ning, N. C.-H. Lai, M.-K. Wong, *Org. Lett.*, 2019, **21**, 6289 – 6294.
3. W. Zi; F. D. Toste, *J. Am. Chem. Soc.*, 2013, **135**, 12600 – 12603.
4. Y. Mi, T. Zhou, K.-P. Wang, D. Lee, Y. Xia, *Chem. Eur. J.*, 2015, **21**, 17256 – 17268.
5. M. D. Acqua, D. Facoetti, G. Abbiati, E. Rossi, *Synthesis*, 2010, **14**, 2367 – 2378.
6. H. Luo, C. He, H. Jiang, S. Zhu, *Chin. J. Chem.*, 2020, **38**, 1052 – 1056.
7. Y. Ohta, Y. Kubota, T. Watabe, H. Chiba, S. Oishi, N. Fujii, H. Ohno, *J. Org. Chem.*, 2009, **16**, 6299 – 6302.
8. J. Kong, F. Zhang, C. Zhang, W. Chang, L. Liu, J. Li, *Molecular Catalysis*, 2022, **530**, 112633.
9. W. Debrouwer, R. A. J. Seigneur, T. S. A. Heugebaerta, C. V. Stevens, *Chem. Commun.*, 2015, **51**, 729 – 732.
10. G. He, C. Wu, J. Zhou, Q. Yang, C. Zhang, Y. Zhou, H. Zhang, H. Liu, *J. Org. Chem.*, 2018, **83**, 13356 – 13362.
11. J. Nejedlý, M. Šámal, J. Rybáček, I. G. Sánchez, V. Houska, T. Warzecha, J. Vacek, L. Sieger, M. Buděšínský, L. Bednárová, P. Fiedler, I. Císařová, I. Starý, I. G. Stará, *J. Org. Chem.*, 2020, **85**, 248 – 276.
12. J.-R. Deng, N. C.-H. Lai, K. K.-Y. Kung, B. Yang, S.-F. Chung, A. S.-L. Leung, M.-C. Choi, Y.-C. Leung, M.-K Wong, *Commun. Chem.*, 2020, **3**, 67.
13. Z. Cao, H. Zhang, X. Zhang, L. Zhang, X. Meng, G. Chen, X.-E. Zhao, X. Suna, J. You, *RSC Adv.*, 2015, **5**, 103155 – 103158.
